# Supplementary material
Source: PubMed Central journal article supplement (PMC7164811)
Supplement: mmc1.pdf [file mmc1.pdf]

# THE LANCET

## Global Health

### Supplementary appendix

This appendix formed part of the original submission and has been peer reviewed. We post it as supplied by the authors.

Supplement to: Gouglas D, Thanh Le T, Henderson K, et al. Estimating the cost of vaccine development against epidemic infectious diseases: a cost minimisation study. *Lancet Glob Health* 2018; published online Oct 17. [http://dx.doi.org/10.1016/S2214-109X\(18\)30346-2](http://dx.doi.org/10.1016/S2214-109X(18)30346-2).

## **Supplementary Materials**

This document provides supplementary information on data, methods and results for our study on estimating the cost of vaccine development against epidemic infectious diseases. The supplement is comprised of five appendices, which are critical companions of the main article shedding light on methods, assumptions and data sources across all stages of analysis. The appendices include:

- Appendix 1: Acknowledgements
- Appendix 2: EID vaccine R&D pipeline and cost research methods
- Appendix 3: Statistical analysis methods and results for estimating vaccine development project costs and their explanatory factors
- Appendix 4: Monte Carlo Simulations for determining R&D costs associated with current vaccine pipeline structures for 11 EIDs
- Appendix 5: Stochastic optimization methods and sensitivity analysis

## Appendix 1: Acknowledgements

In this appendix we offer acknowledgement to all these organizations that dedicated the time and effort to respond to our pipeline and cost data requests, to all of whom we are very grateful.

- Artemis One Health
- Baylor College Medicine
- Bharat Biotech International
- Biofabri, S.L
- BunyaVax B.V.
- CanSino Biologics Inc.
- Cell Guidance Systems
- Centro de Investigación en Sanidad Animal, INIA, Valdeolmos, Madrid, Spain
- Colorado State University
- Commonwealth Scientific and Industrial Research Organisation (CSIRO)
- Department of Health-UK
- Emergent BioSolutions
- Excivion Ltd.
- GeneOne Life Science
- GeoVax
- GlaxoSmithKline plc (GSK)
- Indian Immunologicals Ltd.
- Inovio Pharmaceuticals
- Institut Pasteur
- Integrated Biotherapeutics
- Johnson & Johnson
- Karolinska Institutet
- Leaf expression systems
- LiteVax B.V.
- Medigen, Inc.
- Moderna Therapeutics
- MonitorCRO
- Najit Technologies, Inc
- Novavax
- New York Blood Center
- Paul Ehrlich Institute (PEI)
- Paxvax
- Pirbright Institute
- Profectus Biosciences
- Public Health Agency of Canada
- Research Councils UK
- Sanofi Pasteur
- SEEK
- Sementis Ltd
- Singapore Immunology Network
- Takeda Pharmaceuticals, Vaccines Business Unit
- The University of Queensland
- Themis Bioscience GmbH
- Thomas Jefferson University
- The Scripps Research Institute (TSRI)
- University of Iowa
- University of Liverpool
- University of Oxford
- University of Plymouth
- University of Rochester
- University of Wisconsin-Madison
- Uniformed Services University of the Health Sciences, USA
- United States Army Medical Research Institute of Infectious Diseases (USAMRIID); US Army Medical Research and Materiel Command (USAMRMC); United States Department of Defense (US DoD)
- US Biologic
- Vaccine and Infectious Disease Organization-International Vaccine Centre (VIDO-InterVac)

- Valneva SE
- Vaxine Pty Ltd, Australia
- Viroclinics Biosciences
- Wageningen Bioveterinary Research
- Undisclosed survey respondent

## Appendix 2: EID vaccine R&D pipeline and cost data collection methods and additional results

In this appendix we present the details of our EID vaccine R&D pipeline and cost data collection methodology, including the presentation of some additional findings underpinning assumptions behind our simulation and stochastic optimization methods explained in other appendices of this supplement.

We begin with a discussion of the search methods and assumptions underlying the pipeline research process, including sources and strategies used to clean and validate the collected data. We then turn to the steps undertaken to collect cost information associated with EID vaccine R&D pipelines, providing details of the raw data findings and the assumptions behind these.

### Step 1: Pipeline research

Our pipeline research comprised of a two stepped process:

- Step 1: a literature search
- Step 2: a survey-based validation process of the literature findings (and in some cases the identification of new candidates not available through public sources).

The final EID vaccine R&D pipeline included in this study is the outcome of these two sequential steps and is constrained by the following key assumptions that served as screening criteria in the pipeline compilation process:

- A vaccine candidate would need to be directed towards human use
- A vaccine candidate would need to classify as such if it followed the typology on vaccine technologies provided in the literature<sup>1</sup>
- Candidates demonstrating purely a passive immunization (e.g monoclonal antibodies) would not be considered as vaccines
- Vaccine candidates would only be considered if:
  - o They had shown, as a minimum, some immunogenicity data in an animal model. If only in vitro studies and/or computational studies were available, candidates would be disregarded.
  - o They had generated efficacy data, and showed complete protection. If candidates demonstrated efficacy data but did not show complete protection they would be disregarded.
  - o They had not been terminated for safety reasons.
  - o They were not duplicate entries with other candidates identified through different literature sources or survey respondents, on the basis of whether: (1) the candidates targeted the same antigen (and hence the same disease); (2) the candidates used the same platform technology; (3) developers of these vaccine candidates were the same. If vaccine candidates differed on one or more of these three criteria, and were reported as such by survey respondents also, they were considered as different vaccine candidates.
  - o They had demonstrated some R&D activity, through published or other sources, during the past 10 years and no earlier than 2006.

#### Step 1.1: literature search

From April to July 2016 we collected data on vaccine R&D pipelines from preclinical through Phase III for 11 pathogens deemed by the WHO as likely to cause severe outbreaks in the near future. The original dataset was largely based on: a report by the Norwegian Institute of Public Health;<sup>2</sup> additional expert inputs from CEPI task teams (listed in the CEPI preliminary business plan 2017–2021);<sup>3</sup> mining of key academic literature,<sup>3–11</sup> clinicaltrials.gov; the NIH project reporter database; and other publicly available sources (e.g. numerous other funder websites and individual researcher and developer websites) for vaccine pipeline information on vaccines within the WHO scope. Depending on source searching, search terms were based on [pathogen name], [vaccine candidate name], [developer name], ‘vaccine’ and combinations of these. Searches were limited to the last 11 years (2006 onwards).

From January 2017 to September 2017 the original pipeline database was updated. Specifically, we applied different search strategies on the following sources:

- **Pubmed:** First, we searched using a combination of two search options: “All field” for term “vaccine” and “Meshterm” for name of the disease. Second, we searched by name of each EID under “Abstract”.
- **Google & Google Scholar:** We searched by EID name and keyword “vaccine”.
- **Clinicaltrial.gov:** We searched by EID name under search field ‘condition’ and by keyword “vaccine” under search field ‘intervention’.
- **ICTRP and country level trial registries:** We searched by EID name under search field ‘condition’ and by keyword “vaccine” under search field ‘intervention’.
- **NIH reporter:** We searched by EID name and keyword “vaccine” using text Search (Logic) under search fields ‘Search in: Project and FY: Active Projects’
- **WHO pipeline tracker:** We searched for EID vaccines without specific search terms using this publically available dataset.

In order to ensure completeness of our search efforts, we also searched for pipeline information more freely in websites and press releases of organizations identified as vaccine development partners in our previous literature searches. We scanned the reference lists of identified articles in the literature for any missed vaccine candidates from previous searches. And we circulated lists of vaccine candidates including literature references to members of CEPI’s Scientific Advisory Committee and other experts, for confirmation, addition to, or modification of our previous literature findings where more up to date information was made available on any particular candidate.

From an original volume of ~2,500 articles identified through the various sources and search strategies described above, we identified ~600 articles, press releases and online material as in scope and associated with a potential total number of 262 vaccine candidates from preclinical through phase III against the 11 EIDs. (See references for these at the end of the appendix)

**Appendix figure 2.1: PRISMA flow diagram**

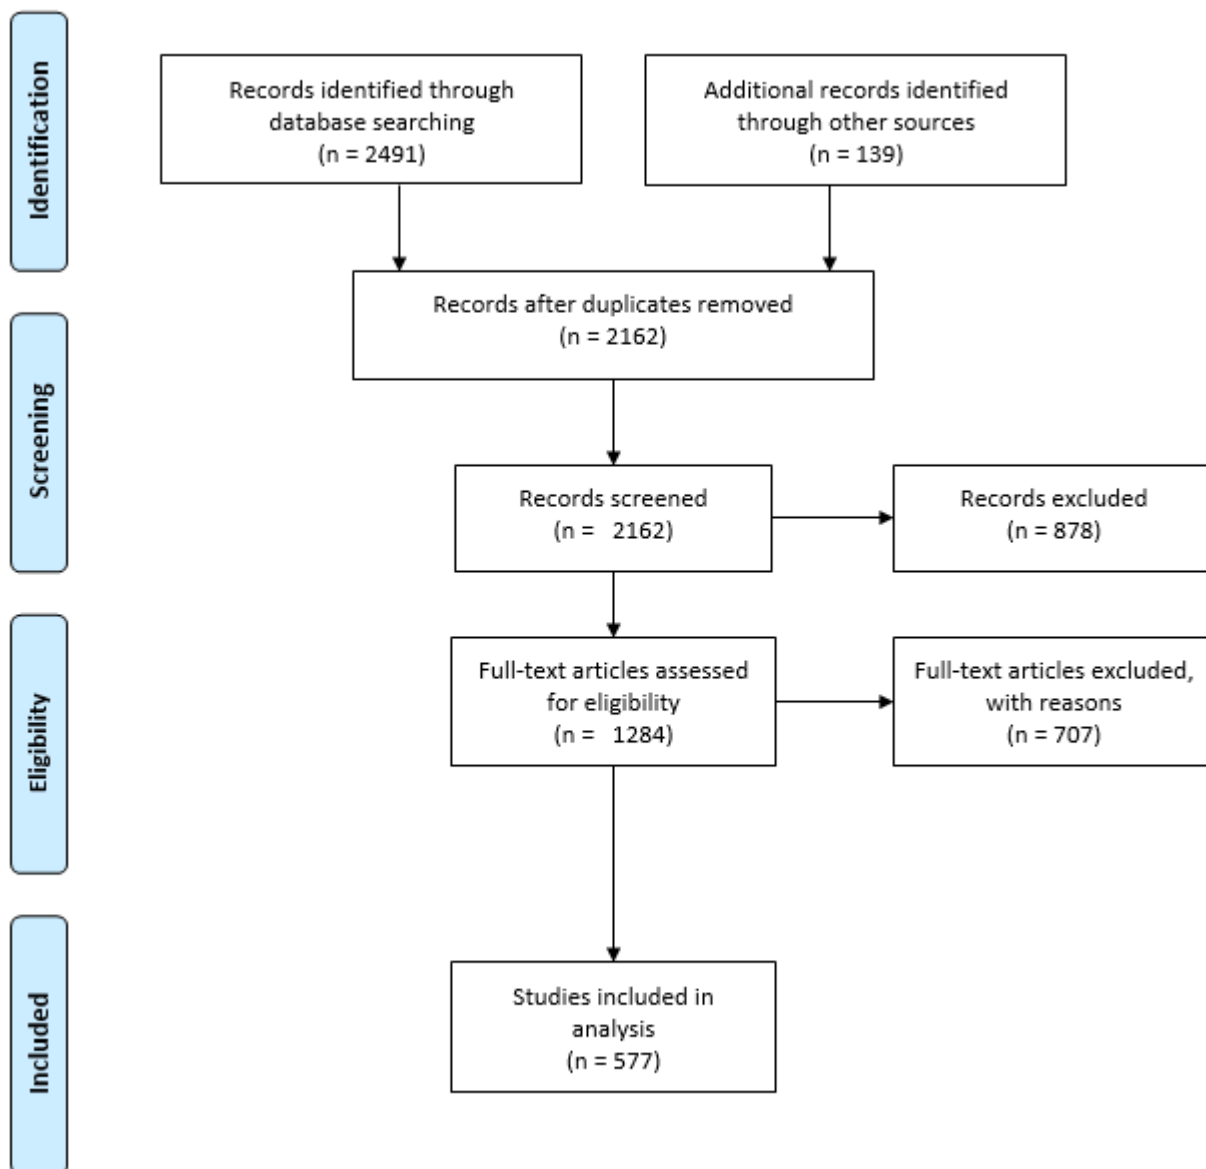

Step 1.2: survey validation

We acknowledge that the definition of current product pipelines is challenging as there are a number of limitations to information gathering, including: not all information is publically available as developers may wish to keep information confidential, not all information is updated regularly on the publically available sources, the status of product development is dynamic, including partners involved and development status. In order to address these limitations we conducted a survey validation step.

Specifically, from September 2017 to January 2018 we validated the previously collated EID vaccine R&D pipeline data, through a survey sent to 414 organizations identified as directly or indirectly (e.g. as funders or collaborating partners of vaccine project owners) relevant to EID vaccine R&D in previous literature searches (covering the 262 vaccine candidates identified in Step 1). The survey aimed to:

- capture the current status of development of the various vaccine candidates identified in the literature

- identify potentially new vaccine candidates for which information had not been previously made publicly available in the literature
- clarify information on vaccine candidates related to: disease focus; platform technology used; product development partners; sources of funding; time spent and timelines projected for bringing candidates from preclinical through phase II stages of development; costs realized and costs projected for bringing candidates from preclinical through phase II stages of development; drivers of costs, timelines and risks associated with vaccine candidate development programmes.

We received survey responses from 64 organizations, covering 314 vaccine candidates for EIDs in total. Out of these, 121 were confirmations of active, not yet started or on hold vaccine candidates due to lack of funding previously identified through the literature review. 193 were newly reported vaccine candidates, out of which 97 vaccine candidates concerned infectious diseases of epidemic potential outside the scope of the WHO priority list.<sup>1</sup>

From the original set of 262 vaccine candidates identified in the literature for the 11 WHO priority EIDs, 104 remained unspecified due to lack of responses at the end of the survey, 44 were confirmed as terminated, on hold due to technical reason or were not confirmed at all as active projects by survey respondents, and 114 were confirmed as active, not yet started, or on hold due to lack of funding or other reasons not related to technical failures.

Appendix tables 2.1 to 2.11 below presents the validated list of vaccine candidates currently active, not yet started, or on hold due to lack of funding or other reasons not associated with technical failures, for 11 WHO priority EIDs. The table provides information on a total number of 210 candidates (including: survey validated candidates identified initially through the literature; new candidates reported by survey respondents not available in the literature; and excluding candidates from CEPI's own database of projects for which no evidence had been generated either through literature or survey). This table is based on the data collection and validation process outlined above and is limited, to our best of effort, and reflection of the current status of the vaccine development pipelines as at 30<sup>th</sup> January 2018.

Vaccine R&D pipelines for 11 priority EIDs (as of 30<sup>th</sup> January 2018), including two phase IIb/III ready vaccine candidates for Ebola, are presented in appendix tables 2.1 to 2.11 below.

---

<sup>1</sup> Anaplasmosis; Argentinian Haemorrhagic Fever; Avian Influenza Type H7; Babesia, atypical; Bolivian Haemorrhagic Fever; Bordetella pertussis; Borrelia miyamotoi; Campylobacter jejuni; Coxiella Burnetti (Q Fever); Cytomegalovirus; Dengue; Dobrava virus; East Equine Encephalitis; Ehrlichiosis; Enterotoxigenic Escherichia Coli (ETEC) diarrhoeal disease; Guanarito; Hantavirus Cardiopulmonar; Hepatitis E; Herpes Zoster; HPV; Human metapneumovirus and parainfluenza combinations; Human monkeypox; Influenza universal; Japanese Encephalitis; Junin; Lyme borreliosis; Machupo; Measles; Neisseria meningitidis; Norovirus; O'nyong'nyong virus; Pandemic H1N1; Pandemic H10N8; Pandemic H7N9; Paratyphoid; Plague; Puumala virus; Respiratory syncytial virus; Sabia; Schmallenberg disease; Seoul virus; Shigella; Smallpox, Variola major and other related pox viruses; Tickborne Encephalitis Complex Flaviviruses; Tuberculosis; Typhoid fever; Venezuelan Equine Encephalitis; Venezuelan Haemorrhagic fever; West Equine Encephalitis; West Nile Virus; Yellow Fever.

**Appendix Table 2.1: Chikungunya vaccine R&D pipeline, preclinical through phase II**

| <b>Disease</b> | <b>Vaccine candidate</b>                                                                                                      | <b>R&amp;D phase</b> | <b>Development Partners</b>                                                                                                                                                                                                    |
|----------------|-------------------------------------------------------------------------------------------------------------------------------|----------------------|--------------------------------------------------------------------------------------------------------------------------------------------------------------------------------------------------------------------------------|
| Chikungunya    | VRC-CHKVLP059-00-VP (37997)                                                                                                   | Phase II             | National Institute of Allergy and Infectious Diseases (NIAID); The EMMES Corporation; Leidos; FHI 360; PaxVax                                                                                                                  |
| Chikungunya    | MV-CHIK recombinant measles virus vaccine expressing Chikungunya virus antigens                                               | Phase II             | Themis Bioscience GmbH; Institut Pasteur;<br>In cooperation: National Institute of Allergy and Infectious Diseases (NIAID); Walter Reed Army Institute of Research (WRAIR)                                                     |
| Chikungunya    | CHIKV- 5nsP3                                                                                                                  | Phase I              | Karolinska Institute; EU research Council; Swedish research Council; Valneva SE                                                                                                                                                |
| Chikungunya    | mRNA-1388                                                                                                                     | Phase I              | Moderna Therapeutics                                                                                                                                                                                                           |
| Chikungunya    | BBV87 (Inactivated whole virion CHIKV vaccine)                                                                                | Phase I              | Bharat Biotech International                                                                                                                                                                                                   |
| Chikungunya    | Formalin inactivated CHIKV181/25                                                                                              | Phase I              | Indian Immunologicals Ltd., US Army Medical Research and Material Command (USAMRMC)                                                                                                                                            |
| Chikungunya    | AGS-v, a Universal Mosquito-Borne Disease Vaccine                                                                             | Phase I              | SEEK; National Institute of Allergy and Infectious Diseases (NIAID); Imutex; Innovate UK and the UK Department of Health and Social Care                                                                                       |
| Chikungunya    | Vaccinia [Ankara]-Vectored (MVA-CHIKV E1E26KE3)                                                                               | Preclinical          | CSIC Madrid; Karolinska Institutet                                                                                                                                                                                             |
| Chikungunya    | Vaccinia vectored (MVA-CHIKV E2E3)                                                                                            | Preclinical          | University of Wisconsin- Madison                                                                                                                                                                                               |
| Chikungunya    | p181/25-7CHIKV iDNA                                                                                                           | Preclinical          | Medigen, Inc.; University of Texas Medical Branch (UTMB); National Institute of Allergy and Infectious Diseases (NIAID)                                                                                                        |
| Chikungunya    | SCV-CHIKV (SCV305), SCV viral vectored vaccine                                                                                | Preclinical          | Sementis Ltd                                                                                                                                                                                                                   |
| Chikungunya    | Plasmid DNA ‘DREP-env’ encoding the CHIKV replicase and envelope proteins (but lacking the capsid encoding gene)              | Preclinical          | Karolinska Institutet; University of Tartu; Institute of Emerging Diseases and Innovative Therapies - IMETI; University Paris-Sud XI                                                                                           |
| Chikungunya    | EILV/CHIKV                                                                                                                    | Preclinical          | University of Texas Medical Branch (UTMB); University of Alabama at Birmingham; United States Army Medical Research Institute of Infectious Diseases (USAMRIID)                                                                |
| Chikungunya    | Recombinant Modified Vaccinia Ankara (MVA) expressing E3E2, 6KE1, or the entire CHIKV envelope polyprotein E3E26KE1 cassette. | Preclinical          | Erasmus Medical Center; University of Munich LMU; Erasmus Medical Center Laboratory Animal Science Center (EDC); Artemis One Health                                                                                            |
| Chikungunya    | Inactivated CHIKV                                                                                                             | Preclinical          | Najit Technologies, Inc; National Institute of Allergy and Infectious Diseases (NIAID)                                                                                                                                         |
| Chikungunya    | PODS Chik 1                                                                                                                   | Preclinical          | Cell Guidance Systems; Imperial College London; Department of Health - UK; University of Cambridge                                                                                                                             |
| Chikungunya    | Name yet to be assigned as early stage research                                                                               | Preclinical          | Leaf Expression Systems; Department of Health-UK                                                                                                                                                                               |
| Chikungunya    | Undisclosed                                                                                                                   | Preclinical          | Undisclosed                                                                                                                                                                                                                    |
| Chikungunya    | Infectious DNA (iDNA); Plasmid DNA-launched full-length attenuated RNA of CHIKV                                               | Preclinical          | Karolinska Institutet, Swedish Research Council                                                                                                                                                                                |
| Chikungunya    | Infectious RNA (iRNA); In vitro produced full-length attenuated genomic RNA of CHIKV                                          | Preclinical          | Karolinska Institutet, Swedish Research Council                                                                                                                                                                                |
| Chikungunya    | E2EP3 (long peptide)                                                                                                          | Preclinical          | Singapore Immunology Network                                                                                                                                                                                                   |
| Chikungunya    | SCV-CHIKV+ZIKV+YF, SCV viral vectored vaccine                                                                                 | Preclinical          | Sementis Ltd                                                                                                                                                                                                                   |
| Chikungunya    | SCV-CHIKV+ZIKV (SCV1002), SCV viral vectored vaccine                                                                          | Preclinical          | Sementis Ltd                                                                                                                                                                                                                   |
| Chikungunya    | CHIKV live attenuated virus, a genetically stabilized virus vaccine                                                           | Preclinical          | Medigen, Inc.                                                                                                                                                                                                                  |
| Chikungunya    | CHIKV pMCE321 is a DNA plasmid that encodes CHIKV capsid, envelope E1 and E2 proteins                                         | Preclinical          | Inovio Pharmaceuticals; VGXTM Animal Health; University of Pennsylvania; University of South Florida Morsani College of Medicine                                                                                               |
| Chikungunya    | ChAdOx1 CHIK                                                                                                                  | Preclinical          | University of Oxford                                                                                                                                                                                                           |
| Chikungunya    | CHIKV-IRES (v1/v2)                                                                                                            | Preclinical          | Takeda Pharmaceuticals, Vaccines Business Unit; University of Texas Medical Branch (UTMB); Center for Disease Control and Prevention (CDC); Tulane National Primate Research Center; University of Alabama at Birmingham (UAB) |



## References related to Chikungunya vaccine R&D pipelines:

1. Roques P, Ljungberg K, Kummerer BM, et al. Attenuated and vectored vaccines protect nonhuman primates against Chikungunya virus. *JCI Insight*. 2017;2(6):e83527.
2. Akahata W, Yang ZY, Andersen H, et al. A VLP vaccine for epidemic Chikungunya virus protects non-human primates against infection. *Nature medicine*. 2010;16(3):334–8.
3. Leidos. Leidos Biomed Supports Phase II Clinical Trial for Chikungunya Vaccine [press release]. 2017. Available from: <https://www.leidos.com/features/chikungunya-vaccine-clinical-trial>. [Accessed 26th January 2018]
4. Chang LJ, Dowd KA, Mendoza FH, Saunders JG, Sitar S, Plummer SH, et al. Safety and tolerability of chikungunya virus-like particle vaccine in healthy adults: a phase 1 dose-escalation trial. *The Lancet*. 2014. p. 2046–52.
5. Clinicaltrials.gov. Chikungunya Virus Vaccine Trial in Healthy Adults [Internet]. 2011. Available from: <https://clinicaltrials.gov/beta/show/NCT01489358?id=NCT03101111+OR+NCT02861586+OR+NCT03028441+OR+NCT02562482+OR+NCT01489358&rank=5&load=cart>. [Accessed 26th January 2018]
6. Clinicaltrials.gov. Trial for Safety and Immunogenicity of a Chikungunya Vaccine, VRC-CHKVLP059-00-VP, in Healthy Adults [Internet]. 2015. Available from: <https://clinicaltrials.gov/ct2/show/NCT02562482?term=VRC-CHKVLP059-00-VP&rank=1>. [Accessed 26th January 2018]
7. Kramer RM, Zeng Y, Sahni N, et al. Development of a Stable Virus-Like Particle Vaccine Formulation against Chikungunya Virus and Investigation of the Effects of Polyanions. *Journal of Pharmaceutical Sciences*. 2013;102(12):4305–14.
8. Westerman M. Advance Chikungunya vaccine candidates into later-phase clinical trials. Leidos biomedical research, Inc; NIAID; 2015. Available from: [https://projectreporter.nih.gov/project\\_info\\_description.cfm?aid=9161853&icde=34512187&ddparam=&ddvalue=&ddsub=&cr=50&csb=default&cs=ASC&pball=](https://projectreporter.nih.gov/project_info_description.cfm?aid=9161853&icde=34512187&ddparam=&ddvalue=&ddsub=&cr=50&csb=default&cs=ASC&pball=). [Accessed 26th January 2018]
9. Ledgerwood J. Biodefense/emerging infection vaccine studies. NIAID; 2016. Available from: [https://projectreporter.nih.gov/project\\_info\\_history.cfm?aid=9353051&icde=34536725](https://projectreporter.nih.gov/project_info_history.cfm?aid=9353051&icde=34536725). [Accessed 26th January 2018]
10. Brandler S, Ruffie C, Combredet C, et al. A recombinant measles vaccine expressing chikungunya virus-like particles is strongly immunogenic and protects mice from lethal challenge with chikungunya virus. *Vaccine*. 2013. p. 3718–25.
11. Clinicaltrials.gov. Phase I Trial of Measles Vectored Chikungunya Vaccine [Internet]. 2016. Available from: <https://clinicaltrials.gov/beta/show/NCT03028441?id=NCT03101111+OR+NCT02861586+OR+NCT03028441+OR+NCT02562482+OR+NCT01489358&rank=2&load=cart>. [Accessed 26th January 2018]
12. Clinicaltrials.gov. Phase II Study to Evaluate Safety and Immunogenicity of a Chikungunya Vaccine (MV-CHIK-202) [Internet]. 2016. Available from: <https://clinicaltrials.gov/ct2/show/NCT02861586?term=Chikungunya&intr=vaccine&rank=2>. [Accessed 26th January 2018]
13. Clinicaltrials.gov. Study of a Live Attenuated Chikungunya Vaccine in a Previously Epidemic Area [Internet]. 2017 [cited 29052017]. Available from: <https://clinicaltrials.gov/beta/show/record/NCT03101111?id=NCT03101111+OR+NCT02861586+OR+NCT03028441+OR+NCT02562482+OR+NCT01489358&rank=1&load=cart>. [Accessed 26th January 2018]
14. ICTRP. Clinical trial to investigate the efficacy, safety and tolerability of MV-CHIK, a novel vaccine that prevents infection with Chikungunya Virus [Internet]. 2016. Available from: <http://apps.who.int/trialsearch/Trial2.aspx?TrialID=EUCTR2015-004037-26-AT>. [Accessed 26th January 2018]
15. Ramsauer K, Schwameis M, Firbas C, et al. Immunogenicity, safety, and tolerability of a recombinant measles-virus-based chikungunya vaccine: a randomised, double-blind, placebo-controlled, active-comparator, first-in-man trial. *The Lancet Infectious diseases*. 2015;15(5):519–27.
16. CTRI. Phase-I open label, dose-escalation clinical trial to evaluate the safety, tolerability and immunogenicity of Chikungunya vaccine in healthy adults of 18 to 50 years age [Internet]. 2017. Available from: <http://www.ctri.nic.in/Clinicaltrials/showallp.php?mid1=14549&EncHid=&userName=Chikungunya%20vaccine>. [Accessed 26th January 2018]
17. Smalley C, Erasmus JH, Chesson CB, Beasley DWC. Status of research and development of vaccines for chikungunya. *Vaccine*. 2016;34(26):2976–81.
18. Bao H, Ramanathan AA, Kawalakar O, et al. Nonstructural protein 2 (nsP2) of Chikungunya virus (CHIKV) enhances protective immunity mediated by a CHIKV envelope protein expressing DNA Vaccine. *Viral immunology*. 2013;26(1):75–83.
19. Inovio. Inovio’s DNA-based Monoclonal Antibody and DNA Vaccine Provide 100% Protection Against Lethal Chikungunya Virus Challenge in Preclinical Study [press release]. 2016. Available from: <http://ir.inovio.com/news/news-releases/news-releases-details/2016/Inovios-DNA-based-Monoclonal-Antibody->

- and-DNA-Vaccine-Provide-100-Protection-Against-Lethal-Chikungunya-Virus-Challenge-in-Preclinical-Study/default.aspx. [Accessed 30th March 2017]
20. Muthumani K, Block P, Flingai S, et al. Rapid and Long-Term Immunity Elicited by DNA-Encoded Antibody Prophylaxis and DNA Vaccination Against Chikungunya Virus. *The Journal of infectious diseases*. 2016;214(3):369–78.
  21. Reyes-Sandoval A. Outbreak Pathogens: New Chikungunya Virus Vaccine Programme. 2017 Available from: <http://www.jenner.ac.uk/new-chikungunya-virus-vaccine-programmes>. [Accessed 26th January 2018]
  22. Barker S. Phase Ib trial of a simple, multivalent vaccine to prevent Zika and Chikungunya. The Jenner Institute, University of Oxford, Oxford: Innovate UK; 2018. Available from: <http://gtr.rcuk.ac.uk/projects?ref=971557>. [Accessed 26th January 2018]
  23. Clinicaltrials.gov. Study in Healthy Volunteers to Evaluate the Safety and Immunogenicity of AGS-v, a Universal Mosquito-Borne Disease Vaccine [Internet]. 2017. Available from: <https://clinicaltrials.gov/ct2/show/study/NCT03055000?view=record>. [Accessed 26th January 2018]
  24. Ribeiro JM. Role of saliva in blood-feeding by arthropods. *Annu Rev Entomol*. 1987.
  25. Peng Z, Yang M, Simons FER. Immunologic Mechanisms in Mosquito Allergy: Correlation of Skin Reactions with Specific IgE and IgG Antibodies and Lymphocyte Proliferation Response to Mosquito Antigens. *Annals of Allergy, Asthma & Immunology*. 1996;77(3):238–44.
  26. Sidjanski S, JP. V. Delayed migration of Plasmodium sporozoites from the mosquito bite site to the blood. *The American journal of tropical medicine and hygiene*. 1997.
  27. Chu H, Das SC, Fuchs JF, et al. Deciphering the protective role of adaptive immunity to CHIKV/IRES a novel candidate vaccine against Chikungunya in the A129 mouse model. *Vaccine*. 2013;31(33):3353–60.
  28. Plante K, Wang E, Partidos CD, et al. Novel chikungunya vaccine candidate with an IRES-based attenuation and host range alteration mechanism. *PLoS Pathog*. 2011;7(7):e1002142.
  29. Plante KS, Rossi SL, Bergren NA, Seymour RL, Weaver SC. Extended Preclinical Safety, Efficacy and Stability Testing of a Live-attenuated Chikungunya Vaccine Candidate. *PLoS Negl Trop Dis*. 2015;9(9):e0004007.
  30. Roy CJ, Adams AP, Wang E, et al. Chikungunya vaccine candidate is highly attenuated and protects nonhuman primates against telemetrically monitored disease following a single dose. *The Journal of infectious diseases*. 2014;209(12):1891–9.
  31. Weaver SC. Novel vaccine technology for Chikungunya. UTMB; NIAID; 2014. Available from: [https://projectreporter.nih.gov/project\\_info\\_details.cfm?aid=8704359&icde=0](https://projectreporter.nih.gov/project_info_details.cfm?aid=8704359&icde=0). [Accessed 26th January 2018]
  32. Frolov IV. Single round infection Chikungunya virus as a new vaccine candidate. University of Alabama at Birmingham; NIAID; 2016. Available from: [https://projectreporter.nih.gov/project\\_info\\_description.cfm?aid=9110645&icde=0](https://projectreporter.nih.gov/project_info_description.cfm?aid=9110645&icde=0). [Accessed 26th January 2018]
  33. Wang E, Kim DY, Weaver SC, Frolov I. Chimeric Chikungunya viruses are nonpathogenic in highly sensitive mouse models but efficiently induce a protective immune response. *Journal of virology*. 2011;85(17):9249–52.
  34. Wang E, Volkova E, Adams AP, et al. Chimeric alphavirus vaccine candidates for Chikungunya. *Vaccine*. 2008;26(39):5030–9.
  35. Hallengard D, Kakoulidou M, Lulla A, Kummerer BM, Johansson DX, Mutso M, et al. Novel attenuated Chikungunya vaccine candidates elicit protective immunity in C57BL/6 mice. *Journal of virology*. 2014;88(5):2858–66.
  36. Piper A, Ribeiro M, Smith KM, Briggs CM, Huitt E, Nanda K, et al. Chikungunya virus host range E2 transmembrane deletion mutants induce protective immunity against challenge in C57BL/6J mice. *Journal of virology*. 2013;87(12):6748–57.
  37. Chattopadhyay A, Wang E, Seymour R, Weaver SC, Rose JK. A chimeric vesiculo/alphavirus is an effective alphavirus vaccine. *Journal of virology*. 2013;87(1):395–402.
  38. Rose JK. Testing a novel approach toward a multivalent Chikungunya/Dengue vaccine. Yale University; NIAID; 2015. Available from: [https://projectreporter.nih.gov/project\\_info\\_details.cfm?aid=8948034](https://projectreporter.nih.gov/project_info_details.cfm?aid=8948034). [Accessed 26th January 2018]
  39. Garcia-Arriaza J, Cepeda V, Hallengard D, Sorzano CO, Kummerer BM, Liljestrom P, et al. A novel poxvirus-based vaccine, MVA-CHIKV, is highly immunogenic and protects mice against chikungunya infection. *Journal of virology*. 2014;88(6):3527–47.
  40. Weger-Lucarelli J, Chu H, Aliota MT, Partidos CD, Osorio JE. A novel MVA vectored Chikungunya virus vaccine elicits protective immunity in mice. *PLoS Negl Trop Dis*. 2014. p. e2970.
  41. Tiwari M, Parida M, Santhosh SR, Khan M, Dash PK, Rao PVL. Assessment of immunogenic potential of Vero adapted formalin inactivated vaccine derived from novel ECSA genotype of Chikungunya virus. *Vaccine*. 2009;27(18):2513–22.
  42. Tretyakova I, Hearn J, Wang E, Weaver S, Pushko P. DNA Vaccine Initiates Replication of Live Attenuated Chikungunya Virus In Vitro and Elicits Protective Immune Response in Mice. *The Journal of infectious diseases*. 2014;209(12):1882–90.

43. Khan M, Dhanwani R, Rao PV, Parida M. Subunit vaccine formulations based on recombinant envelope proteins of Chikungunya virus elicit balanced Th1/Th2 response and virus-neutralizing antibodies in mice. *Virus research*. 2012;167(2):236–46.
44. Kumar JS, Khan M, Gupta G, Bhoopati M, Rao PVL, Parida M. Production, Characterization, and Application of Monoclonal Antibodies Specific to Recombinant (E2) Structural Protein in Antigen-Capture ELISA for Clinical Diagnosis of Chikungunya Virus. *Viral immunology*. 2012.
45. Kumar M, Sudeep AB, Arankalle VA. Evaluation of recombinant E2 protein-based and whole-virus inactivated candidate vaccines against chikungunya virus. *Vaccine*. 2012;30(43):6142–9.
46. Metz SW, Gardner J, Geertsema C, et al. Effective Chikungunya Virus-like Particle Vaccine Produced in Insect Cells. *PLoS Neglected Tropical Diseases*. 2013;7(3):e2124.
47. Eldi P, Cooper TH, Liu L, et al. Production of a Chikungunya Vaccine Using a CHO Cell and Attenuated Viral-Based Platform Technology. *Molecular Therapy*. 2017.
48. Sementis, Ltd. Chikungunya 2017. Available from: <http://sementis.com.au/pipeline-products/product-2>. [Accessed 26th January 2018]
49. Hallengard D, Lum FM, Kummerer BM, et al. Prime-boost immunization strategies against Chikungunya virus. *Journal of virology*. 2014;88(22):13333–43.
50. Erasmus JH, Auguste AJ, Kaelber JT, et al. A chikungunya fever vaccine utilizing an insect-specific virus platform. *Nature medicine*. 2017;23(2):192–9.
51. Wang T. Revolutionary Eilat-Based Chikungunya vaccine vector. UTMB; NIAID; 2017.
52. Weber C, Buchner SM, Schnierle BS. A small antigenic determinant of the Chikungunya virus E2 protein is sufficient to induce neutralizing antibodies which are partially protective in mice. *PLoS Negl Trop Dis*. 2015. p. e0003684.
53. van den Doel P, Volz A, Roose JM, et al. Recombinant modified vaccinia virus Ankara expressing glycoprotein E2 of Chikungunya virus protects AG129 mice against lethal challenge. *PLoS Negl Trop Dis*. 2014. p. e3101.
54. Sun Pharmaceutical Industries Ltd. Sun Pharma & NIV sign agreement to fight Zika, Chikungunya and Dengue [press release]. 2017. Available from: <https://www.sunpharma.com/node/160937>. [Accessed 26th January 2018]
55. Moderna. Moderna pipeline. 2017 .Available from: <https://www.modernatx.com/pipeline>. [Accessed 26th January 2018]
56. Van Hoeven N. Development of an Innovative, Effective RNA-based Vaccine for Chikungunya Virus. Pai Life Sciences, Inc.; NIAID; 2017. Available from: <https://www.sbir.gov/sbirsearch/detail/1246551>. [Accessed 26th January 2018]
57. Baldwin SL. Development of a Chikungunya Vaccine candidate. Infectious Disease Research Institute; NIAID; 2017. Available from: [https://projectreporter.nih.gov/project\\_info\\_description.cfm?aid=9317975&icde=36751618&ddparam=&ddvalue=&ddsub=&cr=7&csb=FY&cs=DESC&pball=](https://projectreporter.nih.gov/project_info_description.cfm?aid=9317975&icde=36751618&ddparam=&ddvalue=&ddsub=&cr=7&csb=FY&cs=DESC&pball=). [Accessed 26th January 2018]
58. Amanna I. Development of an H2O2-inactivated chikungunya virus vaccine. Najit Technologies, Inc.; SBIR; 2017. Available from: <https://www.sbir.gov/sbirsearch/detail/1248611>. [Accessed 26th January 2018]
59. Saraswat S, Athmaram TN, Parida M, Agarwal A, Saha A, Dash PK. Expression and Characterization of Yeast Derived Chikungunya Virus Like Particles (CHIK-VLPs) and Its Evaluation as a Potential Vaccine Candidate. *PLOS Neglected Tropical Diseases*. 2016;10(7):e0004782.
60. Leaf Expression Systems. Leaf Expression Systems have been awarded the following grants. 2018. Available from: <https://www.leafexpressionsystems.co.uk/news-and-events/grants/>. [Accessed 26th January 2018]
61. Hidajat R, Nickols B, Forrester N, Tretyakova I, Weaver S, Pushko P. Next generation sequencing of DNA-launched Chikungunya vaccine virus. *Virology*. 2016. p. 83–90.
62. Ahola T, Couderc T, Ng LF, et al. Therapeutics and vaccines against chikungunya virus. *Vector borne and zoonotic diseases* (Larchmont, NY). 2015;15(4):250–7.

**Appendix Table 2.2: CCHF vaccine R&D pipeline, preclinical through phase I**

| <b>Disease</b>                          | <b>Vaccine candidate</b>                                               | <b>R&amp;D phase</b> | <b>Development Partners</b>                                                                                               |
|-----------------------------------------|------------------------------------------------------------------------|----------------------|---------------------------------------------------------------------------------------------------------------------------|
| Crimean Congo Haemorrhagic Fever (CCHF) | KIRIM-KONGO-VAX Prepared in Cell Culture and Inactivated With Formalin | Phase I              | Tubitak; Ministry of Health of Turkey; Monitor CRO; Aydin Erenmemisoglu; Erciyes University                               |
| Crimean Congo Haemorrhagic Fever (CCHF) | ChAdOx1 CCHF                                                           | Preclinical          | University of Oxford                                                                                                      |
| Crimean Congo Haemorrhagic Fever (CCHF) | ChAdOx2 CCHF                                                           | Preclinical          | University of Oxford                                                                                                      |
| Crimean Congo Haemorrhagic Fever (CCHF) | recombinant MVA expressing CCHFv glycoprotein                          | Preclinical          | Department of Health-UK; Pirbright Institute; University of Oxford; Microbiology Services Research, Public Health England |
| Crimean Congo Haemorrhagic Fever (CCHF) | DNA CCHFv M segment                                                    | Preclinical          | United States Army Medical Research Institute of Infectious Diseases (USAMRIID)                                           |
| Crimean Congo Haemorrhagic Fever (CCHF) | Gc-e Subunit vaccine                                                   | Preclinical          | Wageningen Bioveterinary Research                                                                                         |
| Crimean Congo Haemorrhagic Fever (CCHF) | Undisclosed                                                            | Preclinical          | Undisclosed                                                                                                               |

## References related to the CCHF vaccine R&D pipeline:

1. Keshtkar-Jahromi M, Kuhn JH, Christova I, Bradfute SB, Jahrling PB, Bavari S. Crimean-Congo hemorrhagic fever: current and future prospects of vaccines and therapies. *Antiviral Res.* 2011;90(2):85–92.
2. Kortekaas J, Ergonul O, Moormann RJ. Interventions against West Nile virus, Rift Valley fever virus, and Crimean-Congo hemorrhagic fever virus: where are we? *Vector borne and zoonotic diseases* (Larchmont, NY). 2010;10(7):709–18.
3. Clinicaltrials.gov. Phase I Study to Evaluate Basic Pharmacodynamic, Pharmacological and Toxicological Effects of the Newly Developed Crimean-Congo Hemorrhagic Fever Vaccine for Humans [Internet]. 2017. Available from: <https://clinicaltrials.gov/ct2/show/record/NCT03020771>. [Accessed 26th January 2018]
4. Buttigieg KR, Dowall SD, Findlay-Wilson S, Miloszewska A, Rayner E, Hewson R, et al. A novel vaccine against Crimean-Congo Haemorrhagic Fever protects 100% of animals against lethal challenge in a mouse model. *PLoS One.* 2014;9(3):e91516.
5. Dowall SD, Graham VA, Rayner E, Hunter L, Watson R, Taylor I, et al. Protective effects of a Modified Vaccinia Ankara-based vaccine candidate against Crimean-Congo Haemorrhagic Fever virus require both cellular and humoral responses. *PLoS One.* 2016;11(6):e0156637.
6. Garrison AR, Shoemaker CJ, Golden JW, Fitzpatrick CJ, Suschak JJ, Richards MJ, et al. A DNA vaccine for Crimean-Congo hemorrhagic fever protects against disease and death in two lethal mouse models. *PLOS Neglected Tropical Diseases.* 2017;11(9):e0005908.
7. Spik K, Shurtleff A, McElroy AK, Guttieri MC, Hooper JW, SchmalJohn C. Immunogenicity of combination DNA vaccines for Rift Valley fever virus, tick-borne encephalitis virus, Hantaan virus, and Crimean Congo hemorrhagic fever virus. *Vaccine.* 2006;24(21):4657–66.
8. Ghiasi SM, Salmanian AH, Chinikar S, Zakeri S. Mice orally immunized with a transgenic plant expressing the glycoprotein of Crimean-Congo hemorrhagic fever virus. *Clinical and vaccine immunology : CVI.* 2011;18(12):2031–7.
9. UK Vaccine Network, prepared by Karl Simpson. Status of vaccine candidates for 13 infectious diseases with epidemic potential in low-income countries. [Presentation]. 2016. (Unpublished)
10. Kuczera A. Development of an economically viable CCHF virus vaccine for local production. Oxford Expression Technologies Limited, Oxford; Innovate UK; 2017. Available from: <http://gtr.rcuk.ac.uk/projects?ref=972227>. [Accessed 26th January 2018]
11. Oxford Expression Technologies. Development of an economically viable Crimean Congo Haemorrhagic Fever virus vaccine for local production 2017. Available from: <https://oetltd.com/research-and-development/>. [Accessed 26th January 2018]
12. Hinkula J, Devignot S, Akerstrom S, et al. Immunization with DNA Plasmids Coding for Crimean-Congo Hemorrhagic Fever Virus Capsid and Envelope Proteins and/or Virus-Like Particles Induces Protection and Survival in Challenged Mice. *Journal of virology.* 2017;91(10).
13. Rahpeyma M, Samarbaf-Zadeh A, Makvandi M, Ghadiri AA, Dowall SD, Fotouhi F. Expression and characterization of codon-optimized Crimean-Congo hemorrhagic fever virus Gn glycoprotein in insect cells. *Arch Virol.* 2017.
14. Barker S. Preclinical Crimean Congo Haemorrhagic Fever Vaccine Development. University of Oxford, United Kingdom; Innovate UK; 2018. Available from: <http://gtr.rcuk.ac.uk/projects?ref=971519>. [Accessed 26th January 2018]

**Appendix Table 2.3: Ebola vaccine R&D pipeline, preclinical through phase III**

| Disease | Vaccine candidate                                                                                             | R&D phase   | Development Partners                                                                                                                                                                                                                                                                                                                                                                                                                                                                                                                                                                                                                                                                                                  |
|---------|---------------------------------------------------------------------------------------------------------------|-------------|-----------------------------------------------------------------------------------------------------------------------------------------------------------------------------------------------------------------------------------------------------------------------------------------------------------------------------------------------------------------------------------------------------------------------------------------------------------------------------------------------------------------------------------------------------------------------------------------------------------------------------------------------------------------------------------------------------------------------|
| Ebola   | VSV-ZEBOV GP                                                                                                  | Phase III   | Public Health Agency of Canada; Merck Sharp & Dohme Corp.; World Health Organization (WHO); Wellcome Trust; Institute of Tropical Medicine; University of Tuebingen; Albert Schweitzer Hospital; Philipps University Marburg Medical Center; Universitätsklinikum Hamburg-Eppendorf University Hospital; National Institute of Allergy and Infectious Diseases (NIAID); Centers for Disease Control and Prevention; University of Sierra Leone; Ministry of Health and Sanitation - Sierra Leone; Department of Health and Human Services - eHealth Africa; University of Texas Medical Branch; Boston University School of Medicine; United States Army Medical Research Institute of Infectious Diseases (USAMRIID) |
| Ebola   | Ad26.ZEBOV + MVA-BN-Filo                                                                                      | Phase III   | Janssen Vaccines & Prevention B.V.; Bavarian Nordic GmbH; National Institute of Allergy and Infectious Diseases (NIAID); BARDA; Walter Reed Army Institute of Research (WRAIR); EBOVAC 1 and 2 Consortia (IM): London School of Hygiene and Tropical Medicine (LSHTM); Institut National de la Santé Et de la Recherche Médicale (INSERM), University of Oxford                                                                                                                                                                                                                                                                                                                                                       |
| Ebola   | ChAd3 EBOZ - A chimpanzee adenovirus 3–vectored vaccine encoding the surface glycoprotein of Ebolavirus Zaire | Phase II    | GlaxoSmithKline; Okairos; University of Maryland; National Institute of Allergy and Infectious Diseases Vaccine Research Center (in collaboration with University of Oxford; Centre Hospitalier Universitaire Vaudois; Infectious Disease Service, CHUV, Lausanne; Policlinique Médicale Universitaire; University of Lausanne Hospitals; Swiss Tropical & Public Health Institute; World Health Organization; Immunology and Allergy Service, CHUV, Lausanne; Bernhard Nocht Institute for Tropical Medicine)                                                                                                                                                                                                        |
| Ebola   | EBOV GP                                                                                                       | Phase I     | Novavax, Inc.                                                                                                                                                                                                                                                                                                                                                                                                                                                                                                                                                                                                                                                                                                         |
| Ebola   | rVSVN4CT1-EBOVGP1 (VesiculoVax)                                                                               | Phase I     | Profectus BioSciences Inc; Yale University; University of Texas Medical Branch (UTMB); United States Department of Defense (US DOD); Joint Vaccine Acquisition Program (JVAP); BARDA                                                                                                                                                                                                                                                                                                                                                                                                                                                                                                                                  |
| Ebola   | Multivalent Filovirus vaccine (heterologous prime boost with Ad26.Filo and MVA-BN-Filo)                       | Phase I     | Janssen Vaccines & Prevention B.V.; Bavarian Nordic GmbH; National Institute of Allergy and Infectious Diseases (NIAID)                                                                                                                                                                                                                                                                                                                                                                                                                                                                                                                                                                                               |
| Ebola   | INO-4201 is a DNA plasmid that encodes the full-length Ebola virus glycoprotein                               | Phase I     | Inovio Pharmaceuticals Inc.; GeneOne Life Science, Inc.; Public Health Agency of Canada; University of Pennsylvania; University of Manitoba; The University of Texas at Austin                                                                                                                                                                                                                                                                                                                                                                                                                                                                                                                                        |
| Ebola   | Undisclosed                                                                                                   | Preclinical | Undisclosed                                                                                                                                                                                                                                                                                                                                                                                                                                                                                                                                                                                                                                                                                                           |
| Ebola   | Marv VLPs; EBOV VLP; SUDV VLPs (Blended)                                                                      | Preclinical | United States Army Medical Research Institute of Infectious Diseases (USAMRIID); Integrated Biotherapeutics, Inc; Protein Expression Laboratory; Science Applications International Corporation (SAIC)–Frederick, National Cancer Institute, Frederick, Maryland                                                                                                                                                                                                                                                                                                                                                                                                                                                      |
| Ebola   | VRP SUDV GP + VRP EBOV GP                                                                                     | Preclinical | United States Army Medical Research Institute of Infectious Diseases (USAMRIID)                                                                                                                                                                                                                                                                                                                                                                                                                                                                                                                                                                                                                                       |
| Ebola   | Undisclosed                                                                                                   | Preclinical | Undisclosed                                                                                                                                                                                                                                                                                                                                                                                                                                                                                                                                                                                                                                                                                                           |
| Ebola   | CAdVax-filo GP + NP<br>CAdVax-EBOV M7 + M8                                                                    | Preclinical | United States Army Medical Research Institute of Infectious Diseases (USAMRIID); Medical University of South Carolina                                                                                                                                                                                                                                                                                                                                                                                                                                                                                                                                                                                                 |
| Ebola   | Ad-CAGoptZGP + Ad-IFN $\alpha$                                                                                | Preclinical | Public Health Agency of Canada; University of Manitoba                                                                                                                                                                                                                                                                                                                                                                                                                                                                                                                                                                                                                                                                |
| Ebola   | inact. BNSP333-coEBOV/SUD/MARV/LASVGP + adjuvants (FILORAB1, FILORAB2, FILORAB3, LASSARAB)                    | Preclinical | Thomas Jefferson University; Excell BIO, Inc.; National Institute of Allergy and Infectious Diseases (NIAID); United States Army Medical Research Institute of Infectious Diseases (USAMRIID); IDT Biologika GmbH; Infectious disease research institute (IDRI)                                                                                                                                                                                                                                                                                                                                                                                                                                                       |
| Ebola   | VSV-EBOV GP, VSV-SUDV GP, VSV-MARV GP                                                                         | Preclinical | Public Health Agency of Canada; Boston University School of Medicine; United States Army Medical Research Institute of Infectious Diseases (USAMRIID); University of Manitoba; National Institute of Allergy and Infectious Diseases(NIAID); National Emerging Infectious Diseases Laboratories Institute                                                                                                                                                                                                                                                                                                                                                                                                             |
| Ebola   | DNA EBOV GP + rAd5-EBOV GP                                                                                    | Preclinical | United States Army Medical Research Institute of Infectious Diseases (USAMRIID); National Institute of Allergy and Infectious Diseases (NIAID); Centers for Disease Control and Prevention                                                                                                                                                                                                                                                                                                                                                                                                                                                                                                                            |
| Ebola   | CAdVax-EBOV M7 + M8                                                                                           | Preclinical | United States Army Medical Research Institute of Infectious Diseases (USAMRIID); Medical University of South Carolina                                                                                                                                                                                                                                                                                                                                                                                                                                                                                                                                                                                                 |
| Ebola   | Undisclosed                                                                                                   | Preclinical | Undisclosed                                                                                                                                                                                                                                                                                                                                                                                                                                                                                                                                                                                                                                                                                                           |

|       |                                                                                                                                 |             |                                                                                                                                                                                |
|-------|---------------------------------------------------------------------------------------------------------------------------------|-------------|--------------------------------------------------------------------------------------------------------------------------------------------------------------------------------|
| Ebola | MVA-VLP-TV vaccine (Haemorrhagic Fever Vaccine (Ebola, Sudan, Marburg, Lassa))                                                  | Preclinical | GeoVax; United States Army Medical Research Institute of Infectious Diseases (USAMRIID)                                                                                        |
| Ebola | PODS Ebola 1                                                                                                                    | Preclinical | Cell Guidance Systems; University of Cambridge; Imperial College London; Department of Health - UK                                                                             |
| Ebola | Undisclosed                                                                                                                     | Preclinical | Undisclosed                                                                                                                                                                    |
| Ebola | Undisclosed                                                                                                                     | Preclinical | Undisclosed                                                                                                                                                                    |
| Ebola | DNA pWRG/EBOV-GP(opt)                                                                                                           | Preclinical | United States Army Medical Research Institute of Infectious Diseases (USAMRIID); Ichor Medical Systems                                                                         |
| Ebola | DNA pWRG/SUDV-GP(opt)                                                                                                           | Preclinical | United States Army Medical Research Institute of Infectious Diseases (USAMRIID); Ichor Medical Systems                                                                         |
| Ebola | GEO-EM03                                                                                                                        | Preclinical | Geovax                                                                                                                                                                         |
| Ebola | MV-EBOV recombinant measles virus vaccine expressing EBOV antigens                                                              | Preclinical | Institut Pasteur                                                                                                                                                               |
| Ebola | NILV-EBO                                                                                                                        | Preclinical | Institut Pasteur; Theravectys                                                                                                                                                  |
| Ebola | Structurally designed Pan-ebolavirus vaccine                                                                                    | Preclinical | Integrated Biotherapeutics                                                                                                                                                     |
| Ebola | DREP-GP: DNA plasmid expressing an alphavirus replicase and the glycoprotein of Ebola                                           | Preclinical | Karolinska Institutet, Swedish Research Council                                                                                                                                |
| Ebola | Ebola RNA-Moderna                                                                                                               | Preclinical | Moderna Therapeutics                                                                                                                                                           |
| Ebola | rVSVN4CT1-SUDVGP1 (VesiculoVax™ Vesicular Stomatitis Virus Vector)                                                              | Preclinical | Profectus; Yale University; University of Texas Medical Branch (UTMB); National Institute of Allergy and Infectious Diseases (NIAID); Joint Vaccine Acquisition Program (JVAP) |
| Ebola | rVSVN4CT1-EBOV/SUDV/MARV/LASV Quadra-valent (VesiculoVax™ Vesicular Stomatitis Virus Vector)                                    | Preclinical | Profectus; Yale University; University of Texas Medical Branch (UTMB); National Institute of Allergy and Infectious Diseases (NIAID)                                           |
| Ebola | ChAdOX1 triFilo(2A)                                                                                                             | Preclinical | University of Oxford                                                                                                                                                           |
| Ebola | ChAdOx1-biEBOV                                                                                                                  | Preclinical | University of Oxford                                                                                                                                                           |
| Ebola | Ebola GP VLP                                                                                                                    | Preclinical | Vaxine Pty Ltd, Australia; United States Army Medical Research Institute of Infectious Diseases (USAMRIID)                                                                     |
| Ebola | RREP-GP: DNA plasmid expressing an alphavirus replicase and the glycoprotein of Ebola; In vitro RNA transcript of the template. | Preclinical | Karolinska Institutet, Swedish Research Council                                                                                                                                |
| Ebola | DIOS-panEbola                                                                                                                   | Preclinical | Department of Health - UK; University of Cambridge; University of Oxford                                                                                                       |
| Ebola | Undisclosed                                                                                                                     | Preclinical | Undisclosed                                                                                                                                                                    |
| Ebola | Ebola GPclamp                                                                                                                   | Preclinical | The University of Queensland; Australian Government - National Health and Medical Research Council (NHMRC)                                                                     |
| Ebola | GEO-EM01                                                                                                                        | Preclinical | Geovax                                                                                                                                                                         |
| Ebola | DNA pWRG/EBOV-Z76(opt); Mayina                                                                                                  | Preclinical | United States Army Medical Research Institute of Infectious Diseases (USAMRIID); PharmaJet                                                                                     |
| Ebola | DNA pWRG/SUDV-BON(opt); Boniface                                                                                                | Preclinical | United States Army Medical Research Institute of Infectious Diseases (USAMRIID); PharmaJet                                                                                     |
| Ebola | DNA pWRG/EBOV-BUN(opt); Bundibugyo                                                                                              | Preclinical | United States Army Medical Research Institute of Infectious Diseases (USAMRIID); PharmaJet                                                                                     |
| Ebola | DNA pWRG/EBOV-Z14(opt); Guinea                                                                                                  | Preclinical | United States Army Medical Research Institute of Infectious Diseases (USAMRIID); PharmaJet                                                                                     |

## References related to the Ebola vaccine R&D pipeline:

1. Marzi A, Halfmann P, Hill-Batorski L, et al. Vaccines. An Ebola whole-virus vaccine is protective in nonhuman primates. *Science* (New York, NY). 2015;348(6233):439–42.
2. Ledgerwood J. Biodefense/emerging infection vaccine studies. NIAID; 2016. Available from: [https://projectreporter.nih.gov/project\\_info\\_history.cfm?aid=9353051&icde=34536725](https://projectreporter.nih.gov/project_info_history.cfm?aid=9353051&icde=34536725). [Accessed 26th January 2018]
3. Clinicaltrials.gov. Open Study of the Duration of Immunity After Vaccination With GamEvac-Combi [Internet]. 2016 [cited 29042017]. Available from: <https://clinicaltrials.gov/ct2/show/study/NCT02911415>. [Accessed 26th January 2018]
4. Clinicaltrials.gov. International Multicenter Study of the Immunogenicity of Medicinal Product GamEvac-Combi [Internet]. 2017 [cited 13062017]. Available from: [https://clinicaltrials.gov/ct2/show/NCT03072030?cond=Ebola&intr=vaccine&rank=21&sel\\_rss=mod14](https://clinicaltrials.gov/ct2/show/NCT03072030?cond=Ebola&intr=vaccine&rank=21&sel_rss=mod14). [Accessed 26th January 2018]
5. Dolzhikova IV, Zubkova OV, Tukhvatulin AI, et al. Safety and immunogenicity of GamEvac-Combi, a heterologous VSV- and Ad5-vectored Ebola vaccine: An open phase I/II trial in healthy adults in Russia. *Human vaccines & immunotherapeutics*. 2017;13(3):613–20.
6. Innovative Medicines Initiative. EBOVAC1. 2018. Available from: <http://www.imi.europa.eu/projects-results/project-factsheets/ebovac1>. [Accessed 26th January 2018]
7. Innovative Medicines Initiative. EBOVAC2. 2018. Available from: <http://www.imi.europa.eu/projects-results/project-factsheets/ebovac2>. [Accessed 26th January 2018]
8. Clinicaltrials.gov. A Study to Assess Safety Tolerability and Immunogenicity of Three Prime-boost Regimens of the Candidate Prophylactic Vaccines for Ebola in Healthy Adults [Internet]. 2015 [cited 14062017]. Available from: [https://clinicaltrials.gov/ct2/show/NCT02416453?cond=Ebola&intr=vaccine&rank=43&sel\\_rss=mod14&submit\\_fld\\_opt=](https://clinicaltrials.gov/ct2/show/NCT02416453?cond=Ebola&intr=vaccine&rank=43&sel_rss=mod14&submit_fld_opt=). [Accessed 26th January 2018]
9. Clinicaltrials.gov. A Study to Evaluate A Range of Dose Levels of Ad26.ZEBOV and MVA- BN- Filo in Healthy Adult Participants [Internet]. 2015. Available from: [https://clinicaltrials.gov/ct2/show/NCT02543567?cond=Ebola&intr=vaccine&rank=55&sel\\_rss=mod14&submit\\_fld\\_opt=](https://clinicaltrials.gov/ct2/show/NCT02543567?cond=Ebola&intr=vaccine&rank=55&sel_rss=mod14&submit_fld_opt=). [Accessed 26th January 2018]
10. Clinicaltrials.gov. A Study to Evaluate the Immunogenicity, Safety and Tolerability of Ad26.ZEBOV and MVA- BN- Filo in Healthy Adult Participants [Internet]. 2015. Available from: [https://clinicaltrials.gov/ct2/show/NCT02543268?cond=Ebola&intr=vaccine&rank=56&sel\\_rss=mod14&submit\\_fld\\_opt=](https://clinicaltrials.gov/ct2/show/NCT02543268?cond=Ebola&intr=vaccine&rank=56&sel_rss=mod14&submit_fld_opt=). [Accessed 26th January 2018]
11. FeldMann H. Cap: Trivalent filovirus vaccine for pre- and post-exposure vaccination. NIAID; 2016. Available from: [https://projectreporter.nih.gov/project\\_info\\_description.cfm?aid=9354909&icde=34727062&ddparam=&ddvalue=&ddsub=&cr=43&csb=default&cs=ASC&pball=](https://projectreporter.nih.gov/project_info_description.cfm?aid=9354909&icde=34727062&ddparam=&ddvalue=&ddsub=&cr=43&csb=default&cs=ASC&pball=). [Accessed 26th January 2018]
12. Clinicaltrials.gov. Staged Phase 3 Study to Assess the Safety and Immunogenicity of Ebola Candidate Vaccines Ad26.ZEBOV and MVA-BN-Filo During Implementation of Stages 1 and 2 (EBOVAC-Salone) [Internet]. 2017. Available from: <https://clinicaltrials.gov/ct2/show/NCT02509494>. [Accessed 26th January 2018]
13. Clinicaltrials.gov. A Phase I Trial to Utilize Systems Biology Approaches to Examine the Safety, Immunogenicity, and Omics Response to MVA-BN@-Filo and Ad26.ZEBOV Vaccines in Healthy Volunteers [Internet]. 2016 [cited 19042017]. Available from: <https://clinicaltrials.gov/ct2/show/NCT02891980>. [Accessed 26th January 2018]
14. Clinicaltrials.gov. MVA-BN@-Filo and Ad26.ZEBOV Vaccines in Healthy Volunteers [Internet]. 2016 . Available from: <https://clinicaltrials.gov/ct2/show/NCT02891980>. [Accessed 26th January 2018]
15. Clinicaltrials.gov. A Safety and Immunogenicity Study of Heterologous Prime-Boost Ebola Vaccine Regimens in Healthy Participants [Internet]. 2014. Available from: [https://clinicaltrials.gov/ct2/show/NCT02313077?cond=Ebola&intr=vaccine&rank=51&sel\\_rss=mod14&submit\\_fld\\_opt=](https://clinicaltrials.gov/ct2/show/NCT02313077?cond=Ebola&intr=vaccine&rank=51&sel_rss=mod14&submit_fld_opt=). [Accessed 26th January 2018]
16. Clinicaltrials.gov. Safety, Tolerability and Immunogenicity Study of 2 Prime-boost Regimens for Ebola Vaccines Ad26.ZEBOV/MVA-BN-Filo [Internet]. 2015. Available from: [https://clinicaltrials.gov/ct2/show/NCT02598388?cond=Ebola&intr=vaccine&rank=28&sel\\_rss=mod14&submit\\_fld\\_opt=](https://clinicaltrials.gov/ct2/show/NCT02598388?cond=Ebola&intr=vaccine&rank=28&sel_rss=mod14&submit_fld_opt=). [Accessed 26th January 2018]
17. Clinicaltrials.gov. A Study to Assess the Safety and Immunogenicity of Heterologous Prime-Boost Ebola Vaccine Regimens in Healthy Participants [Internet]. 2015. Available from: [https://clinicaltrials.gov/ct2/show/NCT02376400?cond=Ebola&intr=vaccine&rank=52&sel\\_rss=mod14&submit\\_fld\\_opt=](https://clinicaltrials.gov/ct2/show/NCT02376400?cond=Ebola&intr=vaccine&rank=52&sel_rss=mod14&submit_fld_opt=). [Accessed 26th January 2018]
18. Clinicaltrials.gov. A Study to Evaluate the Safety and Immunogenicity of Heterologous Prime-Boost Ebola Vaccine Regimens in Healthy Participants [Internet]. 2015. Available from:



- [https://clinicaltrials.gov/ct2/show/NCT02376426?cond=Ebola&intr=vaccine&rank=54&sel\\_rss=mod14&submit\\_fld\\_opt=](https://clinicaltrials.gov/ct2/show/NCT02376426?cond=Ebola&intr=vaccine&rank=54&sel_rss=mod14&submit_fld_opt=). [Accessed 26th January 2018]
19. Clinicaltrials.gov. A Randomized, Observer-blind, Placebo-controlled, Two part, Phase 2 Study to Evaluate the Safety, Tolerability and Immunogenicity of Two Prime-boost Regimens of the Candidate Prophylactic Vaccines for Ebola Ad26.ZEBOV and MVA-BN-Filo [Internet]. 2017. Available from: <http://apps.who.int/trialsearch/Trial2.aspx?TrialID=PACTR201608001734218>. [Accessed 26th January 2018]
  20. Clinicaltrials.gov. A Study to Evaluate Safety, Tolerability, and Immunogenicity of Heterologous Prime-boost Regimens Using the Multivalent Filovirus Vaccines Ad26.Filo and MVA-BN-Filo Administered in Different Sequences and Schedules in Healthy Adults [Internet]. 2016. Available from: <https://clinicaltrials.gov/ct2/show/NCT02860650>. [Accessed 26th January 2018]
  21. Callendret B. Advanced development of an Ebola vaccine. Crucell Holland, BV; NIAID; 2016. Available from: [https://projectreporter.nih.gov/project\\_info\\_description.cfm?aid=9201108&icde=34727062&ddparam=&ddvalue=&ddsub=&cr=26&csb=default&cs=ASC&pball=](https://projectreporter.nih.gov/project_info_description.cfm?aid=9201108&icde=34727062&ddparam=&ddvalue=&ddsub=&cr=26&csb=default&cs=ASC&pball=). [Accessed 26th January 2018]
  22. Strom BL, Buysse M, Hughes J, Knoppers BM. Data sharing, year 1--access to data from industry-sponsored clinical trials. *N Engl J Med*. 2014;371(22):2052–4.
  23. Clinicaltrials.gov. Partnership for Research on Ebola VACCinations (PREVAC) [Internet]. 2016. Available from: <https://clinicaltrials.gov/ct2/show/NCT02876328>. [Accessed 26th January 2018]
  24. Clinicaltrials.gov. Long-term Safety Follow-up of Participants Exposed to the Candidate Ebola Vaccines Ad26.ZEBOV and/or MVA-BN-Filo [Internet]. 2016. Available from: [https://clinicaltrials.gov/ct2/show/NCT02661464?cond=Ebola&intr=vaccine&rank=17&sel\\_rss=mod14&submit\\_fld\\_opt=](https://clinicaltrials.gov/ct2/show/NCT02661464?cond=Ebola&intr=vaccine&rank=17&sel_rss=mod14&submit_fld_opt=). [Accessed 26th January 2018]
  25. Clinicaltrials.gov. Evaluating the Safety of and Immune Response to a Human Parainfluenza Virus Type 3 Ebola Virus Vaccine (HPIV3-EbovZ GP) in Healthy Adults [Internet]. 2015. Available from: <https://clinicaltrials.gov/ct2/show/study/NCT02564575>. [Accessed 26th January 2018]
  26. Meyer M, Garron T, Lubaki NM, et al. Aerosolized Ebola vaccine protects primates and elicits lung-resident T cell responses. *The Journal of Clinical Investigation*. 2015;125(8):3241–55.
  27. Bukreyev A. Broadly specific needle-free vaccines against emerging and biothreat viruses. NIAID; 2017. Available from: [https://projectreporter.nih.gov/project\\_info\\_description.cfm?aid=9269983&icde=34726998&ddparam=&ddvalue=&ddsub=&cr=24&csb=default&cs=ASC&pball=](https://projectreporter.nih.gov/project_info_description.cfm?aid=9269983&icde=34726998&ddparam=&ddvalue=&ddsub=&cr=24&csb=default&cs=ASC&pball=). [Accessed 26th January 2018]
  28. Clinicaltrials.gov. Study to Evaluate the Immunogenicity and Safety of an Ebola Virus (EBOV) Glycoprotein (GP) Vaccine in Healthy Subjects [Internet]. 2015. Available from: <https://clinicaltrials.gov/ct2/show/record/NCT02370589?term=novavax+ebola&rank=1>. [Accessed 26th January 2018]
  29. Clinicaltrials.gov. A Booster Dose of Ad5-EBOV in Healthy Adults after Primary Immunization [Internet]. 2015. Available from: [https://clinicaltrials.gov/ct2/show/NCT02533791?cond=Ebola&intr=vaccine&rank=14&sel\\_rss=mod14&submit\\_fld\\_opt=](https://clinicaltrials.gov/ct2/show/NCT02533791?cond=Ebola&intr=vaccine&rank=14&sel_rss=mod14&submit_fld_opt=). [Accessed 26th January 2018]
  30. Clinicaltrials.gov. A Phase I Clinical Trial to Evaluate the Ebola Adenovirus Vector Vaccine (Ad5-EBOV) in Healthy Adults. [Internet]. 2014 [cited 27082015]. Available from: <https://clinicaltrials.gov/ct2/show/NCT02326194?term=NCT02326194&rank=1>. [Accessed 26th January 2018]
  31. Clinicaltrials.gov. A Clinical Trial to Evaluate the Recombinant Human Type5 Adenovirus Vector Based Ebola Virus Disease Vaccine [Internet]. 2015. Available from: [https://clinicaltrials.gov/ct2/show/NCT02575456?cond=Ebola&intr=vaccine&rank=8&sel\\_rss=mod14&submit\\_fld\\_opt=](https://clinicaltrials.gov/ct2/show/NCT02575456?cond=Ebola&intr=vaccine&rank=8&sel_rss=mod14&submit_fld_opt=). [Accessed 26th January 2018]
  32. Li J-X, Hou L-H, Meng F-Y, et al. Immunity duration of a recombinant adenovirus type-5 vector-based Ebola vaccine and a homologous prime-boost immunisation in healthy adults in China: final report of a randomised, double-blind, placebo-controlled, phase 1 trial. *The Lancet Global Health*. 2016;5(3):e324–e34.
  33. A Phase II Clinical Trial to Evaluate the Recombinant Human Type 5 Adenovirus Vector Based Ebola Virus Disease Vaccine (Ad5-EBOV) [Internet]. 20150910. Available from: <http://www.pactr.org/ATMWeb/appmanager/atm/atmregistry?dar=true&tNo=PACTR201509001259869>. [Accessed 26th January 2018]
  34. Sullivan NJ, Hensley L, Asiedu C, Geisbert TW, Stanley D, Johnson J, et al. CD8+ cellular immunity mediates rAd5 vaccine protection against Ebola virus infection of nonhuman primates. *Nature medicine*. 2011;17(9):1128–31.
  35. Wu S, Kroeker A, Wong G, He S, Hou L, Audet J, et al. An Adenovirus Vaccine Expressing Ebola Virus Variant Makona Glycoprotein Is Efficacious in Guinea Pigs and Nonhuman Primates. *The Journal of infectious diseases*. 2016;214(suppl 3):S326–s32.
  36. Zhu F-C, Hou L-H, Li J-X, Wu S-P, Liu P, Zhang G-R, et al. Safety and immunogenicity of a novel recombinant adenovirus type-5 vector-based Ebola vaccine in healthy adults in China: preliminary report of a randomised, double-blind, placebo-controlled, phase 1 trial. *The Lancet*. 2015;385(9984):2272–9.

37. Clinicaltrials.gov. Trial to Evaluate Safety and Immunogenicity of an Ebola Zaire Vaccine in Healthy Adults [Internet]. 2016. Available from: <https://clinicaltrials.gov/ct2/show/study/NCT02718469?view=record>. [Accessed 26th January 2018]
38. Eldridge JH. RVSV vectored vaccine to protect against Ebola and Marburg viruses. 2016. Available from: [https://projectreporter.nih.gov/project\\_info\\_description.cfm?aid=9058458&icde=34727062](https://projectreporter.nih.gov/project_info_description.cfm?aid=9058458&icde=34727062). [Accessed 26th January 2018]
39. Eldridge JH. RP1: RVSV vectored vaccine to treat Ebola and Marburg infection. 2017. Available from: [https://projectreporter.nih.gov/project\\_info\\_description.cfm?aid=9235245&icde=34727062&ddparam=&ddvalue=&ddsub=&cr=40&csb=default&cs=ASC&pball=](https://projectreporter.nih.gov/project_info_description.cfm?aid=9235245&icde=34727062&ddparam=&ddvalue=&ddsub=&cr=40&csb=default&cs=ASC&pball=). [Accessed 26th January 2018]
40. Matassov D, Marzi A, Latham T, et al. Vaccination With a Highly Attenuated Recombinant Vesicular Stomatitis Virus Vector Protects Against Challenge With a Lethal Dose of Ebola Virus. *The Journal of infectious diseases*. 2015;212 Suppl 2:S443–51.
41. Mire CE, Matassov D, Geisbert JB, et al. Single-dose attenuated Vesiculovax vaccines protect primates against Ebola Makona virus. *Nature*. 2015;520(7549):688–91.
42. Sullivan NJ. Ebola Vaccine Development. 2016. Available from: [https://projectreporter.nih.gov/project\\_info\\_description.cfm?aid=9339101&icde=34727062&ddparam=&ddvalue=&ddsub=&cr=90&csb=default&cs=ASC&pball=](https://projectreporter.nih.gov/project_info_description.cfm?aid=9339101&icde=34727062&ddparam=&ddvalue=&ddsub=&cr=90&csb=default&cs=ASC&pball=). [Accessed 26th January 2018]
43. Clinicaltrials.gov. Open-Label Study of INO-4212 With or Without INO-9012, Administered IM or ID Followed by Electroporation in Healthy Volunteers [Internet]. 2015. Available from: <https://clinicaltrials.gov/ct2/show/NCT02464670>. [Accessed 26th January 2018]
44. Marzi A, Halfmann P, Hill-Batorski L, et al. An Ebola whole-virus vaccine is protective in nonhuman primates. *Science* (New York, NY). 2015;348(6233):439–42.
45. Warfield KL, Posten NA, Swenson DL, et al. Filovirus-like particles produced in insect cells: immunogenicity and protection in rodents. *The Journal of infectious diseases*. 2007;196 Suppl 2:S421–9.
46. Herbert AS, Kuehne AI, Barth JF, et al. Venezuelan equine encephalitis virus replicon particle vaccine protects nonhuman primates from intramuscular and aerosol challenge with ebolavirus. *Journal of virology*. 2013;87(9):4952–64.
47. Sullivan NJ, Geisbert TW, Geisbert JB, et al. Immune Protection of Nonhuman Primates against Ebola Virus with Single Low-Dose Adenovirus Vectors Encoding Modified GPs. *PLoS Med*. 2006;3(6).
48. Pratt WD, Wang D, Nichols DK, et al. Protection of Nonhuman Primates against Two Species of Ebola Virus Infection with a Single Complex Adenovirus Vector. *Clinical and vaccine immunology : CVI*. 2010;17(4):572–81.
49. Swenson DL, Wang D, Luo M, et al. Vaccine to confer to nonhuman primates complete protection against multistrain Ebola and Marburg virus infections. *Clinical and vaccine immunology : CVI*. 2008;15(3):460–7.
50. Richardson JS, Pillet S, Bello AJ, Kobinger GP. Airway Delivery of an Adenovirus-Based Ebola Virus Vaccine Bypasses Existing Immunity to Homologous Adenovirus in Nonhuman Primates. *Journal of virology*. 2013;87(7):3668–77.
51. Blaney JE, Marzi A, Willet M, Papaneri AB, Wirblich C, Feldmann F, et al. Antibody quality and protection from lethal Ebola virus challenge in nonhuman primates immunized with rabies virus based bivalent vaccine. *PLoS Pathog*. 2013;9(5):e1003389.
52. Johnson RF, Kurup D, Hagen KR, et al. An Inactivated Rabies Virus-Based Ebola Vaccine, FILORAB1, Adjuvanted With Glucopyranosyl Lipid A in Stable Emulsion Confers Complete Protection in Nonhuman Primate Challenge Models. *The Journal of infectious diseases*. 2016;214(suppl 3):S342–s54.
53. Clinicaltrials.gov. Immunogenicity of Recombinant Vesicular Stomatitis Vaccine for Ebola-Zaire (rVSV[Delta]G-ZEBOV-GP) for Pre-Exposure Prophylaxis (PREP) in People at Potential Occupational Risk for Ebola Virus Exposure [Internet]. ClinicalTrials.Gov. 2016. Available from: <https://clinicaltrials.gov/ct2/show/NCT02788227>. [Accessed 26th January 2018]
54. Clinicaltrials.gov. Safety and Immunogenicity of Prime-Boost Vesicular Stomatitis Virus (VSV) Ebola Vaccine in Healthy Adults (V920-002) [Internet]. 2014. Available from: [https://clinicaltrials.gov/ct2/show/NCT02280408?cond=Ebola&intr=vaccine&rank=7&sel\\_rss=mod14&submit\\_fld\\_opt=](https://clinicaltrials.gov/ct2/show/NCT02280408?cond=Ebola&intr=vaccine&rank=7&sel_rss=mod14&submit_fld_opt=). [Accessed 26th January 2018]
55. Clinicaltrials.gov. Placebo Controlled, Dose Response, Safety and Immunogenicity Study of Vesicular Stomatitis Virus (VSV) Ebola Vaccine in Healthy Adults (V920-004) [Internet]. 2014. Available from: [https://clinicaltrials.gov/ct2/show/NCT02314923?cond=Ebola&intr=vaccine&rank=9&sel\\_rss=mod14&submit\\_fld\\_opt=](https://clinicaltrials.gov/ct2/show/NCT02314923?cond=Ebola&intr=vaccine&rank=9&sel_rss=mod14&submit_fld_opt=). [Accessed 26th January 2018]
56. Clinicaltrials.gov. Phase I Trial to Assess the Safety, Tolerability and Immunogenicity of a Ebola Virus Vaccine (rVSVΔG-ZEBOV-GP) [Internet]. 2014. Available from: [https://clinicaltrials.gov/ct2/show/NCT02283099?cond=Ebola&intr=vaccine&rank=13&sel\\_rss=mod14&submit\\_fld\\_opt=](https://clinicaltrials.gov/ct2/show/NCT02283099?cond=Ebola&intr=vaccine&rank=13&sel_rss=mod14&submit_fld_opt=). [Accessed 26th January 2018]
57. Clinicaltrials.gov. A Study to Find Out if the New Ebola Vaccine is Safe and Stimulates Immunity That Might Protect Adults in Kilifi, Kenya. [Internet]. 2014. Available from:

- [https://clinicaltrials.gov/ct2/show/NCT02296983?cond=Ebola&intr=vaccine&rank=24&sel\\_rss=mod14&submit\\_fld\\_opt=](https://clinicaltrials.gov/ct2/show/NCT02296983?cond=Ebola&intr=vaccine&rank=24&sel_rss=mod14&submit_fld_opt=). [Accessed 26th January 2018]
58. Clinicaltrials.gov. Vaccine Treatment for Ebola Virus in Healthy Adults (V920-001) [Internet]. 2014. Available from: [https://clinicaltrials.gov/ct2/show/NCT02269423?cond=Ebola&intr=vaccine&rank=6&sel\\_rss=mod14](https://clinicaltrials.gov/ct2/show/NCT02269423?cond=Ebola&intr=vaccine&rank=6&sel_rss=mod14). [Accessed 26th January 2018]
  59. Clinicaltrials.gov. Evaluation of the Safety and Immunogenicity of Three Consistency Lots and a High-Dose Lot of rVSV-ZEBOV-GP (V920 Ebola Vaccine) in Healthy Adults (V920-012) [Internet]. 2015. Available from: [https://clinicaltrials.gov/ct2/show/NCT02503202?cond=Ebola&intr=vaccine&rank=27&sel\\_rss=mod14&submit\\_fld\\_opt=](https://clinicaltrials.gov/ct2/show/NCT02503202?cond=Ebola&intr=vaccine&rank=27&sel_rss=mod14&submit_fld_opt=). [Accessed 26th January 2018]
  60. Clinicaltrials.gov. STRIVE (Sierra Leone Trial to Introduce a Vaccine Against Ebola) (STRIVE) [Internet]. 2015. Available from: [https://clinicaltrials.gov/ct2/show/NCT02378753?cond=Ebola&intr=vaccine&rank=5&sel\\_rss=mod14](https://clinicaltrials.gov/ct2/show/NCT02378753?cond=Ebola&intr=vaccine&rank=5&sel_rss=mod14). [Accessed 26th January 2018]
  61. Clinicaltrials.gov. Phase I Trial to Assess the Safety, Tolerability and Immunogenicity of a Ebola Virus Vaccine (VSVΔG-ZEBOV) [Internet]. 2015. Available from: [https://clinicaltrials.gov/ct2/show/NCT02374385?cond=Ebola&intr=vaccine&rank=23&sel\\_rss=mod14&submit\\_fld\\_opt=](https://clinicaltrials.gov/ct2/show/NCT02374385?cond=Ebola&intr=vaccine&rank=23&sel_rss=mod14&submit_fld_opt=). [Accessed 26th January 2018]
  62. Clinicaltrials.gov. African-Canadian Study of HIV-Infected Adults and a Vaccine for Ebola - ACHIV-Ebola [Internet]. 2017. Available from: [https://clinicaltrials.gov/ct2/show/NCT03031912?cond=Ebola&intr=vaccine&rank=3&sel\\_rss=mod14](https://clinicaltrials.gov/ct2/show/NCT03031912?cond=Ebola&intr=vaccine&rank=3&sel_rss=mod14). [Accessed 26th January 2018]
  63. Clinicaltrials.gov. Providing Additional Information on the Safety and Effectiveness of an Ebola Vaccine [Internet]. 2017. Available from: [https://clinicaltrials.gov/ct2/show/NCT03161366?cond=Ebola&intr=vaccine&rank=25&sel\\_rss=mod14&submit\\_fld\\_opt=](https://clinicaltrials.gov/ct2/show/NCT03161366?cond=Ebola&intr=vaccine&rank=25&sel_rss=mod14&submit_fld_opt=). [Accessed 26th January 2018]
  64. Geisbert TW, Daddario-Dicaprio KM, Geisbert JB, et al. Vesicular stomatitis virus-based vaccines protect nonhuman primates against aerosol challenge with Ebola and Marburg viruses. *Vaccine*. 2008;26(52):6894–900.
  65. Henao-Restrepo AM, Longini IM, Egger M, et al. Efficacy and effectiveness of an rVSV-vectored vaccine expressing Ebola surface glycoprotein: interim results from the Guinea ring vaccination cluster-randomised trial. *Lancet* (London, England). 2015;386(9996):857–66.
  66. Jones SM, Feldmann H, Stroher U, et al. Live attenuated recombinant vaccine protects nonhuman primates against Ebola and Marburg viruses. *Nature medicine*. 2005;11(7):786–90.
  67. Marzi A, Engelmann F, Feldmann F, et al. Antibodies are necessary for rVSV/ZEBOV-GP-mediated protection against lethal Ebola virus challenge in nonhuman primates. *Proc Natl Acad Sci USA*. 2013;110(5):1893–8.
  68. Marzi A, Feldmann F, Geisbert TW, Feldmann H, Safronetz D. Vesicular stomatitis virus-based vaccines against Lassa and Ebola viruses. *Emerging infectious diseases*. 2015;21(2):305–7.
  69. Marzi A, Robertson SJ, Haddock E, et al. VSV-EBOV rapidly protects macaques against infection with the 2014/15 Ebola virus outbreak strain. *Science* (New York, NY). 2015;349(6249):739–42.
  70. Qiu X, Fernando L, Alimonti JB, et al. Mucosal immunization of cynomolgus macaques with the VSVDeltaG/ZEBOVGP vaccine stimulates strong ebola GP-specific immune responses. *PLoS One*. 2009;4(5):e5547.
  71. Regules JA, Beigel JH, Paolino KM, Voell J, Castellano AR, Hu Z, et al. A Recombinant Vesicular Stomatitis Virus Ebola Vaccine. *New England Journal of Medicine*. 2015;376(4):330–41.
  72. Clinicaltrials.gov. Partnership for Research on Ebola Vaccines in Liberia (PREVAIL) [Internet]. 2015. Available from: <https://clinicaltrials.gov/ct2/show/NCT02344407>. [Accessed 26th January 2018]
  73. Colloca S, Barnes E, Folgori A, et al. Vaccine vectors derived from a large collection of simian adenoviruses induce potent cellular immunity across multiple species. *Sci Transl Med*. 2012;4(115):115ra2.
  74. Geisbert TW, Geisbert JB, Leung A, et al. Single-injection vaccine protects nonhuman primates against infection with marburg virus and three species of ebola virus. *Journal of virology*. 2009;83(14):7296–304.
  75. Clinicaltrials.gov. Safety, Tolerability, and Immunogenicity of the Ebola Chimpanzee Adenovirus Vector Vaccine (cAd3-EBO), VRC-EBOADC069-00-VP, in Healthy Adults [Internet]. 2014. Available from: [https://clinicaltrials.gov/ct2/show/NCT02231866?cond=Ebola&intr=vaccine&rank=40&sel\\_rss=mod14&submit\\_fld\\_opt=](https://clinicaltrials.gov/ct2/show/NCT02231866?cond=Ebola&intr=vaccine&rank=40&sel_rss=mod14&submit_fld_opt=). [Accessed 26th January 2018]
  76. Clinicaltrials.gov. Ebola CVD-Mali #2000 (Bivalent) VRC-EBOADC069-00-vp (cAd3-EBO) [Internet]. 2015. Available from: <https://clinicaltrials.gov/ct2/show/NCT02368119>. [Accessed 26th January 2018]
  77. Stanley DA, Honko AN, Asiedu C, Trefry JC, Lau-Kilby AW, Johnson JC, et al. Chimpanzee adenovirus vaccine generates acute and durable protective immunity against ebolavirus challenge. *Nature medicine*. 2014;20(10):1126–9.
  78. Clinicaltrials.gov. A Clinical Trial on the Candidate Vaccine cAd3-EBOZ in Healthy Adults in Switzerland [Internet]. 2014. Available from: <https://clinicaltrials.gov/ct2/show/NCT02289027>. [Accessed 26th January 2018]

79. De Santis O, Audran R, Pothin E, Warpelin-Decrausaz L, Vallotton L, Wuerzner G, et al. Safety and immunogenicity of a chimpanzee adenovirus-vectored Ebola vaccine in healthy adults: a randomised, double-blind, placebo-controlled, dose-finding, phase 1/2a study. *The Lancet Infectious Diseases*. 2016;16(3):311–20.
80. Clinicaltrials.gov. Phase 1 Trial of Ebola Vaccine in Mali [Internet]. 2014 [cited 13062017]. Available from: [https://clinicaltrials.gov/ct2/show/NCT02267109?cond=Ebola&intr=vaccine&rank=11&sel\\_rss=mod14&submit\\_fld\\_opt=](https://clinicaltrials.gov/ct2/show/NCT02267109?cond=Ebola&intr=vaccine&rank=11&sel_rss=mod14&submit_fld_opt=). [Accessed 26th January 2018]
81. Clinicaltrials.gov. A Study to Assess New Ebola Vaccines, cAd3-EBO Z and MVA-BN® Filo [Internet]. 2014 [cited 12072017]. Available from: [https://clinicaltrials.gov/ct2/show/NCT02240875?cond=Ebola&intr=vaccine&rank=38&sel\\_rss=mod14&submit\\_fld\\_opt=](https://clinicaltrials.gov/ct2/show/NCT02240875?cond=Ebola&intr=vaccine&rank=38&sel_rss=mod14&submit_fld_opt=). [Accessed 26th January 2018]
82. Clinicaltrials.gov. Clinical Trial of Ebola Vaccines cAd3-EBO, cAd3-EBOZ and MVA-EbolaZ in Healthy Adults in Uganda [Internet]. 2015. Available from: <https://clinicaltrials.gov/ct2/show/NCT02354404>.
83. Clinicaltrials.gov. Evaluation of a New Ebola Vaccine Using a Short-interval Prime-boost Vaccination [Internet]. 2015 [cited 13062017]. Available from: [https://clinicaltrials.gov/ct2/show/NCT02485912?cond=Ebola&intr=vaccine&rank=20&sel\\_rss=mod14&submit\\_fld\\_opt=](https://clinicaltrials.gov/ct2/show/NCT02485912?cond=Ebola&intr=vaccine&rank=20&sel_rss=mod14&submit_fld_opt=). [Accessed 26th January 2018]
84. Clinicaltrials.gov. A Study to Assess Ebola Vaccines ChAd3-EBO-Z and Ad26.ZEBOV [Internet]. 2015 [cited 28042017]. Available from: <https://clinicaltrials.gov/ct2/show/NCT02495246>. [Accessed 26th January 2018]
85. Clinicaltrials.gov. A Phase I Study to Assess Ebola Vaccines cAd3-EBO Z and MVA-EBO Z [Internet]. 2015. Available from: [https://clinicaltrials.gov/ct2/show/NCT02451891?cond=Ebola&intr=vaccine&rank=45&sel\\_rss=mod14&submit\\_fld\\_opt=](https://clinicaltrials.gov/ct2/show/NCT02451891?cond=Ebola&intr=vaccine&rank=45&sel_rss=mod14&submit_fld_opt=). [Accessed 26th January 2018]
86. Hensley LE, Mulangu S, Asiedu C, et al. Demonstration of cross-protective vaccine immunity against an emerging pathogenic Ebolavirus Species. *PLoS Pathog*. 2010;6(5):e1000904.
87. Geisbert TW, Bailey M, Hensley L, et al. Recombinant adenovirus serotype 26 (Ad26) and Ad35 vaccine vectors bypass immunity to Ad5 and protect nonhuman primates against ebolavirus challenge. *Journal of virology*. 2011;85(9):4222–33.
88. Choi JH, Jonsson-Schmunk K, Qiu X, Shedlock DJ, Strong J, Xu JX, et al. A Single Dose Respiratory Recombinant Adenovirus-Based Vaccine Provides Long-Term Protection for Non-Human Primates from Lethal Ebola Infection. *Molecular Pharmaceutics*. 2015;12(8):2712–31.
89. Shedlock DJ, Aviles J, Talbott KT, et al. Induction of broad cytotoxic T cells by protective DNA vaccination against Marburg and Ebola. *Molecular therapy: the journal of the American Society of Gene Therapy*. 2013;21(7):1432–44.
90. Kibuuka H, Berkowitz NM, Millard M, et al. Safety and immunogenicity of Ebola virus and Marburg virus glycoprotein DNA vaccines assessed separately and concomitantly in healthy Ugandan adults: a phase 1b, randomised, double-blind, placebo-controlled clinical trial. *The Lancet*. 2015;385(9977):1545–54.
91. Sarwar UN, Costner P, Enama ME, et al. Safety and immunogenicity of DNA vaccines encoding Ebolavirus and Marburgvirus wild-type glycoproteins in a phase I clinical trial. *The Journal of infectious diseases*. 2015;211(4):549–57.
92. Clinicaltrials.gov. Evaluating an Ebola and a Marburg Vaccine in Uganda. A Phase IB Study to Evaluate the Safety and Immunogenicity of an Ebola DNA Plasmid Vaccine, VRC-EBODNA023-00-VP, and a Marburg DNA Plasmid Vaccine, VRC-MARDNA025-00-VP, in Healthy Adults in Kampala, Uganda [Internet]. 2009. Available from: <https://clinicaltrials.gov/show/NCT00997607>. [Accessed 26th January 2018]
93. Compans RW. A dual vaccine strategy against filovirus infection. NIAID; 2015. Available from: [https://projectreporter.nih.gov/project\\_info\\_description.cfm?aid=8837557&icde=34727062&ddparam=&ddvalue=&ddsub=&cr=30&csb=default&cs=ASC&pball=](https://projectreporter.nih.gov/project_info_description.cfm?aid=8837557&icde=34727062&ddparam=&ddvalue=&ddsub=&cr=30&csb=default&cs=ASC&pball=). [Accessed 26th January 2018]
94. Barker S. Novel multivalent vaccines against haemorrhagic fevers. 2018. Available from: <http://gtr.rcuk.ac.uk/projects?ref=971510>. [Accessed 26th January 2018]
95. Clinicaltrials.gov. VRC 208: Dose, Safety and Immunogenicity of a Recombinant Modified Vaccinia Virus Ankara Ebola Vaccine, VRC-EBOMVA079-00-VP (MVA-EbolaZ), Administered Alone or as a Boost to cAd3-Ebola Vaccines in Healthy Adults [Internet]. 2015. Available from: [https://clinicaltrials.gov/ct2/show/NCT02408913?cond=Ebola&intr=vaccine&rank=42&sel\\_rss=mod14&submit\\_fld\\_opt=](https://clinicaltrials.gov/ct2/show/NCT02408913?cond=Ebola&intr=vaccine&rank=42&sel_rss=mod14&submit_fld_opt=). [Accessed 26th January 2018]
96. Spearman P. Phase I trial of filovirus vaccine – VTEU. 2015. Available from: [https://projectreporter.nih.gov/project\\_info\\_details.cfm?aid=9161827&icde=34727062](https://projectreporter.nih.gov/project_info_details.cfm?aid=9161827&icde=34727062). [Accessed 26th January 2018]
97. Willet M, Kurup D, Papaneri A, Wirblich C, Hooper JW, Kwilas SA, et al. Preclinical Development of Inactivated Rabies Virus-Based Polyvalent Vaccine Against Rabies and Filoviruses. *The Journal of infectious diseases*. 2015;212(Suppl 2):S414–S24.
98. Geovax. Hemorrhagic Fever Vaccine. 2017. Available from: <https://www.geovax.com/hemorrhagic-fever-vaccine-development-program.html>. [Accessed 26th January 2018]

99. Clinicaltrials.gov. Experimental Ebola Vaccine Trial [Internet]. 2003. Available from: [https://clinicaltrials.gov/ct2/show/NCT00072605?cond=Ebola&intr=vaccine&rank=39&sel\\_rss=mod14&submit\\_fld\\_opt=](https://clinicaltrials.gov/ct2/show/NCT00072605?cond=Ebola&intr=vaccine&rank=39&sel_rss=mod14&submit_fld_opt=). [Accessed 26th January 2018]
100. Clinicaltrials.gov. Experimental Vaccine for Prevention of Ebola Virus Infection [Internet]. 2006 [cited 146217]. Available from: [https://clinicaltrials.gov/ct2/show/NCT00374309?cond=Ebola&intr=vaccine&rank=44&sel\\_rss=mod14&submit\\_fld\\_opt=](https://clinicaltrials.gov/ct2/show/NCT00374309?cond=Ebola&intr=vaccine&rank=44&sel_rss=mod14&submit_fld_opt=). [Accessed 26th January 2018]
101. Feldmann H, Geisbert TW. Ebola haemorrhagic fever. *The Lancet*. 2011;377(9768):849–62.
102. Marzi A, Feldmann H. Ebola virus vaccines: an overview of current approaches. *Expert Rev Vaccines*. 2014;13(4):521–31.
103. Pavot V. Ebola virus vaccines: Where do we stand? *Clinical Immunology*. 2016;173:44–9.
104. WHO. Ebola R&D Landscape of clinical candidates and trials. WHO; 2015.
105. Cashman KA, Wilkinson ER, Wollen SE, et al. DNA vaccines elicit durable protective immunity against individual or simultaneous infections with Lassa and Ebola viruses in guinea pigs. *Hum Vaccin Immunother*. 2017 Dec 2;13(12):3010–3019. doi: 10.1080/21645515.2017.1382780. Epub 2017 Nov 14. PMID: 29135337

**Appendix Table 2.4: Lassa vaccine R&D pipeline, preclinical**

| <b>Disease</b> | <b>Vaccine candidate</b>                                                                                                       | <b>R&amp;D phase</b> | <b>Development Partners</b>                                                                                                                                                                                                                                          |
|----------------|--------------------------------------------------------------------------------------------------------------------------------|----------------------|----------------------------------------------------------------------------------------------------------------------------------------------------------------------------------------------------------------------------------------------------------------------|
| Lassa fever    | rVSVN4CT1-LASV (VesiculoVax™ Vesicular Stomatitis Virus Vector)                                                                | Preclinical          | Profectus Biosciences; Yale University; University of Texas Medical Branch (UTMB)                                                                                                                                                                                    |
| Lassa fever    | ML29 L-AttV, rLCMV(IGR/S-S)                                                                                                    | Preclinical          | The Scripps Research Institute (TSRI), USA                                                                                                                                                                                                                           |
| Lassa fever    | ML29 virus - reassortant encodes major immunogenic proteins, GPC and NP, from LASV and RNA polymerase and Z protein from MOPV. | Preclinical          | Medigen, Inc.(technology licensed from the University of Maryland); National Institute of Allergy and Infectious Diseases (NIAID)                                                                                                                                    |
| Lassa fever    | Live attenuated rLCMV/CD                                                                                                       | Preclinical          | University of Rochester; The Scripps Research Institute                                                                                                                                                                                                              |
| Lassa fever    | GPC441-449 subunit                                                                                                             | Preclinical          | University of Vermont College of Medicine; The Scripps Research Institute; MWH Laboratories; University of North Carolina; PaxVax, Inc.;; University of California                                                                                                   |
| Lassa fever    | LASV VLP                                                                                                                       | Preclinical          | Tulane University Health Sciences Center; Autoimmune Technologies, LLC; Corgenix Medical Corporation; Yybion, Inc.;; United States Army Medical Research Institute of Infectious Diseases (USAMRIID)                                                                 |
| Lassa fever    | RABV based on chemically inactivated rabies virus containing Lassa Virus coGPC (LASSARAB)                                      | Preclinical          | Thomas Jefferson University; National Institute of Allergy and Infectious Diseases (NIAID); The Geneva Foundation; United States Army Medical Research Institute of Infectious Diseases (USAMRIID); IDT Biologika GmbH; Infectious disease research institute (IDRI) |
| Lassa fever    | PODS Lassa 1                                                                                                                   | Preclinical          | Cell Guidance Systems; University of Cambridge; Imperial College London; Department of Health - UK                                                                                                                                                                   |
| Lassa fever    | MV-LASV recombinant measles virus vaccine expressing Lassa virus antigens                                                      | Preclinical          | Institut Pasteur; Themis Bioscience GmbH                                                                                                                                                                                                                             |
| Lassa fever    | MOPEVAC (Modified Mopeia virus expressing antigens of pathogenic arenaviruses)                                                 | Preclinical          | Institut Pasteur                                                                                                                                                                                                                                                     |
| Lassa fever    | Alphavirus replicon encoding LASV genes                                                                                        | Preclinical          | Medigen, Inc.; University of Louisville, United States Army Medical Research Institute of Infectious Diseases (USAMRIID)                                                                                                                                             |
| Lassa fever    | Undisclosed                                                                                                                    | Preclinical          | Undisclosed                                                                                                                                                                                                                                                          |
| Lassa fever    | Lassa GPCclamp                                                                                                                 | Preclinical          | The University of Queensland; Australian Government - National Health and Medical Research Council (NHMRC)                                                                                                                                                           |
| Lassa fever    | ChAdOx1 Lassa                                                                                                                  | Preclinical          | University of Oxford                                                                                                                                                                                                                                                 |
| Lassa fever    | MVA Lassa                                                                                                                      | Preclinical          | University of Oxford                                                                                                                                                                                                                                                 |
| Lassa fever    | ChAdOx1-biLAMA                                                                                                                 | Preclinical          | University of Oxford                                                                                                                                                                                                                                                 |
| Lassa fever    | Viral genome rearrangement for the development of live-attenuated arenavirus vaccines                                          | Preclinical          | University of Rochester; The Scripps Research Institute                                                                                                                                                                                                              |
| Lassa fever    | Single cycle infectious viruses as live attenuated arenavirus vaccines                                                         | Preclinical          | University of Rochester; The Scripps Research Institute                                                                                                                                                                                                              |
| Lassa fever    | Undisclosed                                                                                                                    | Preclinical          | Undisclosed                                                                                                                                                                                                                                                          |
| Lassa fever    | GEO-LM01                                                                                                                       | Preclinical          | GeoVax; The Scripps Research Institute; University of Maryland                                                                                                                                                                                                       |
| Lassa fever    | pLASV-GPC is a DNA plasmid vaccine that encodes the LASV glycoprotein precursor gene (GPC)                                     | Preclinical          | Inovio Pharmaceuticals; United States Army Medical Research Institute for Infectious Diseases (USAMRIID)                                                                                                                                                             |
| Lassa fever    | MVA-VLP-TV vaccine (Haemorrhagic Fever Vaccine (Ebola, Sudan, Marburg, Lassa))                                                 | Preclinical          | GeoVax; United States Army Medical Research Institute of Infectious Diseases (USAMRIID)                                                                                                                                                                              |

## References related to the Lassa vaccine R&D pipeline:

1. Barker S. Novel multivalent vaccines against haemorrhagic fevers. The Jenner Institute, University of Oxford, Oxford: Innovate UK; 2018. Available from: <http://gtr.rcuk.ac.uk/projects?ref=971510>. [Accessed 26th January 2018]
2. Hewson R. LassaVacc. National Infection Service, Public Health England, Salisbury; Innovate UK; 2016. Available from: <http://gtr.rcuk.ac.uk/projects?ref=972223>. [Accessed 26th January 2018]
3. Carrion R, Jr., Patterson JL, Johnson C, et al. A ML29 reassortant virus protects guinea pigs against a distantly related Nigerian strain of Lassa virus and can provide sterilizing immunity. *Vaccine*. 2007;25(20):4093–102.
4. Goicochea MA, Zapata JC, Bryant J, Davis H, Salvato MS, Lukashevich IS. Evaluation of Lassa virus vaccine immunogenicity in a CBA/J-ML29 mouse model. *Vaccine*. 2012;30(8):1445–52.
5. Lukashevich IS, Patterson J, Carrion R, et al. A Live Attenuated Vaccine for Lassa Fever Made by Reassortment of Lassa and Mopeia Viruses. *Journal of virology*. 2005;79(22):13934–42.
6. Lukashevich IS, Carrion R, Salvato MS, Mansfield K, Brasky K, Zapata J, et al. Safety, immunogenicity, and efficacy of the ML29 reassortant vaccine for Lassa fever in small non-human primates. *Vaccine*. 2008;26(41):5246–54.
7. Medigen Inc, US. Vaccines for Emerging Diseases. 2017. Available from: <http://medigen-usa.com/vaccines>. [Accessed 26th January 2018]
8. Zapata JC, Poonia B, Bryant J, Davis H, Ateh E, George L, et al. An attenuated Lassa vaccine in SIV-infected rhesus macaques does not persist or cause arenavirus disease but does elicit Lassa virus-specific immunity. *Virology Journal*. 2013;10(1):52.
9. Carrion R, Bredenbeek P, Jiang X, Tretyakova I, Pushko P, Lukashevich IS. Vaccine Platforms to Control Arenaviral Hemorrhagic Fevers. *Journal of vaccines & vaccination*. 2012;3(7):1000160.
10. Lukashevich IS. Development of new bivalent cross-protective arenaviral vaccines. University of Louisville: NIAID; 2015. Available from: [https://projectreporter.nih.gov/project\\_info\\_details.cfm?aid=8821568&icde=0](https://projectreporter.nih.gov/project_info_details.cfm?aid=8821568&icde=0). [Accessed 26th January 2018]
11. Jiang X, Dalebout TJ, Bredenbeek PJ, Carrion R, Brasky K, Patterson J, et al. Yellow fever 17D-vectored vaccines expressing Lassa virus GP1 and GP2 glycoproteins provide protection against fatal disease in guinea pigs. *Vaccine*. 2011;29(6):1248–57.
12. Cashman KA, Broderick KE, Wilkinson ER, Shaia CI, Bell TM, Shurtleff AC, et al. Enhanced Efficacy of a Codon-Optimized DNA Vaccine Encoding the Glycoprotein Precursor Gene of Lassa Virus in a Guinea Pig Disease Model When Delivered by Dermal Electroporation. *Vaccine*. 2013;1(3):262–77.
13. GeoVax. GeoVax Reports Promising Results for Lassa Fever Vaccine [press release]. 2017. Available from: <https://www.geovax.com/news/entry/2017/07/10/geovax-reports-promising-results-for-lassa-fever-vaccine.html>. [Accessed 26th January 2018]
14. GeoVax. Single-Dose Vaccine Conferred 100% Protection in Lethal Challenge Model [press release]. 2017. Available from: <https://www.geovax.com/news/entry/2017/07/10/geovax-reports-promising-results-for-lassa-fever-vaccine.html>. [Accessed 26th January 2018]
15. Profectus Biosciences . VesiculoVax™ Prophylactic Vaccines for Public Health and Biodefense: Ebola/Marburg | EEVs | Chikungunya | Lassa 2017. Available from: <http://www.profectusbiosciences.com/pipeline/vesiculovax.html>. [Accessed 26th January 2018]
16. University Y. Yale Pharmaceutical Pipeline. Available from: [http://ocr.yale.edu/sites/default/files/files/pharma\\_pipeline.pdf](http://ocr.yale.edu/sites/default/files/files/pharma_pipeline.pdf). [Accessed 26th January 2018]
17. Iwasaki M, Ngo N, Cubitt B, Teijaro JR, de la Torre JC. General Molecular Strategy for Development of Arenavirus Live-Attenuated Vaccines. *Journal of virology*. 2015;89(23):12166–77.
18. De la Torre JC. A general molecular strategy for attenuation of human pathogenic arenaviruses. 2016. Available from: [https://projectreporter.nih.gov/project\\_info\\_description.cfm?aid=9112491&icde=32618129&ddparam=&ddvalue=&ddsub=&cr=4&csb=default&cs=ASC&pball=](https://projectreporter.nih.gov/project_info_description.cfm?aid=9112491&icde=32618129&ddparam=&ddvalue=&ddsub=&cr=4&csb=default&cs=ASC&pball=). [Accessed 26th January 2018]
19. Senior K. Lassa fever: current and future control options. *The Lancet Infectious Diseases*. 2009;9(9):532.
20. Andrea M, Friederike F, Thomas WG, Heinz F, David S. Vesicular Stomatitis Virus–Based Vaccines against Lassa and Ebola Viruses. *Emerging Infectious Disease journal*. 2015;21(2):305.
21. Geisbert TW, Jones S, Fritz EA, et al. Development of a New Vaccine for the Prevention of Lassa Fever. *PLoS Medicine*. 2005;2(6):e183.
22. Safronetz D, Mire C, Rosenke K, et al. A recombinant vesicular stomatitis virus-based Lassa fever vaccine protects guinea pigs and macaques against challenge with geographically and genetically distinct Lassa viruses. *PLoS Negl Trop Dis*. 2015;9(4):e0003736.
23. Jahrling P. Pathogenesis and countermeasures of Poxviruses, Hemorrhagic fever Viruses, MERS. NIAID. 2016. Available from: [https://projectreporter.nih.gov/project\\_info\\_description.cfm?aid=9360978&icde=32618584&ddparam=&ddvalue=&ddsub=&cr=10&csb=default&cs=ASC&pball=](https://projectreporter.nih.gov/project_info_description.cfm?aid=9360978&icde=32618584&ddparam=&ddvalue=&ddsub=&cr=10&csb=default&cs=ASC&pball=). [Accessed 26th January 2018]

24. UK Vaccine Network, prepared by Karl Simpson. Status of vaccine candidates for 13 infectious diseases with epidemic potential in low-income countries. [Presentation]. 2016. (Unpublished)
25. Bergthaler A, Gerber NU, Merkler D, Horvath E, de la Torre JC, Pinschewer DD. Envelope exchange for the generation of live-attenuated arenavirus vaccines. *PLoS Pathog*. 2006;2(6):e51.
26. Cheng BYH, Nogales A, de la Torre JC, Martínez-Sobrido L. Development of live-attenuated arenavirus vaccines based on codon deoptimization of the viral glycoprotein. *Virology*. 2017;501:35–46.
27. Botten J, Whitton JL, Barrowman P, et al. A multivalent vaccination strategy for the prevention of Old World arenavirus infection in humans. *Journal of virology*. 2010;84(19):9947–56.
28. Branco LM, Grove JN, Geske FJ, et al. Lassa virus-like particles displaying all major immunological determinants as a vaccine candidate for Lassa hemorrhagic fever. *Journal of virology*. 2010;7:279.
29. Kotturi MF, Botten J, Sidney J, et al. A multivalent and cross-protective vaccine strategy against arenaviruses associated with human disease. *PLoS Pathog*. 2009;5(12):e1000695.
30. Leblanc P, Moise L, Luza C, , et al. VaxCelerate II: rapid development of a self-assembling vaccine for Lassa fever. *Human vaccines & immunotherapeutics*. 2014;10(10):3022–38.
31. Thomas Jefferson University. Novel Vaccine for Ebola & other Hemorrhagic Fever Viruses. [press release]. 2017. Available from: <http://www.jefferson.edu/university/news/2017/09/26/novel-vaccine-for-ebola-and-other-viruses.html>. [Accessed 26th January 2018]
32. Cheng BY, Ortiz-Riano E, de la Torre JC, Martinez-Sobrido L. Arenavirus Genome Rearrangement for the Development of Live Attenuated Vaccines. *Journal of virology*. 2015;89(14):7373–84.
33. Rodrigo WW, de la Torre JC, Martinez-Sobrido L. Use of single-cycle infectious lymphocytic choriomeningitis virus to study hemorrhagic fever arenaviruses. *Journal of virology*. 2011;85(4):1684–95.
34. Geovax. Hemorrhagic Fever Vaccine. 2017. Available from: <https://www.geovax.com/hemorrhagic-fever-vaccine-development-program.html>. [Accessed 26th January 2018]
35. Grant-Klein RJ, Altamura LA, Schmaljohn CS. Progress in recombinant DNA-derived vaccines for Lassa virus and filoviruses. *Virus research*. 2011;162(1–2):148–61.
36. Lukashevich IS. Advanced Vaccine Candidates for Lassa Fever. *Viruses*. 2012;4(11):2514–57.
37. Lukashevich IS, Pushko P. Vaccine platforms to control Lassa fever. *Expert Review of Vaccines*. 2016;15(9):1135–50.
38. Cashman KA, Wilkinson ER, Wollen SE, et al. DNA vaccines elicit durable protective immunity against individual or simultaneous infections with Lassa and Ebola viruses in guinea pigs. *Hum Vaccin Immunother*. 2017 Dec 2;13(12):3010–3019. doi: 10.1080/21645515.2017.1382780. Epub 2017 Nov 14. PMID: 29135337
39. Cashman KA, Wilkinson ER, Shaia CI, Facemire PR, Bell TM, Bearss JJ, Shamblin JD, Wollen SE, Broderick KE, Sardesai NY, Schmaljohn CS. A DNA vaccine delivered by dermal electroporation fully protects cynomolgus macaques against Lassa fever. *Hum Vaccin Immunother*. 2017 Dec 2;13(12):2902–2911. doi: 10.1080/21645515.2017.1356500. Epub 2017 Oct 18. PMID:29045192



**Appendix Table 2.5: Marburg vaccine R&D pipeline, preclinical through phase I**

| <b>Disease</b> | <b>Vaccine candidate</b>                                                                               | <b>R&amp;D phase</b> | <b>Development Partners</b>                                                                                                                                                                                                                                          |
|----------------|--------------------------------------------------------------------------------------------------------|----------------------|----------------------------------------------------------------------------------------------------------------------------------------------------------------------------------------------------------------------------------------------------------------------|
| Marburg        | Ebola DNA and Marburg DNA - prime boost                                                                | Phase I              | National Institute of Allergy and Infectious Diseases (NIAID); Makerere University; Makerere University Walter Reed Project (MUWRP) clinic; Walter Reed Army Institute of Research (WRAIR)                                                                           |
| Marburg        | DNA                                                                                                    | Phase I              | AgilVax; Integrated Biotherapeutics; National Institute of Allergy and Infectious Diseases (NIAID); Visterra; United States Army Medical Research Institute of Infectious Diseases (USAMRIID)                                                                        |
| Marburg        | MARV VLPs                                                                                              | Preclinical          | United States Army Medical Research Institute of Infectious Diseases (USAMRIID); Integrated Biotherapeutics, Inc.                                                                                                                                                    |
| Marburg        | Undisclosed                                                                                            | Preclinical          | Undisclosed                                                                                                                                                                                                                                                          |
| Marburg        | VEE replicon particles (VRP) expressed GP from MARV                                                    | Preclinical          | United States Army Medical Research Institute of Infectious Diseases (USAMRIID)                                                                                                                                                                                      |
| Marburg        | Trimeric hybrid GPs (VLPs)                                                                             | Preclinical          | United States Army Medical Research Institute of Infectious Diseases (USAMRIID)                                                                                                                                                                                      |
| Marburg        | complex adenovirus (CAdVax) five different filoviruses                                                 | Preclinical          | United States Army Medical Research Institute of Infectious Diseases (USAMRIID)                                                                                                                                                                                      |
| Marburg        | MARV VP40 and GP (VLPs)                                                                                | Preclinical          | United States Army Medical Research Institute of Infectious Diseases (USAMRIID)                                                                                                                                                                                      |
| Marburg        | MVA-VLP-TV vaccine (Haemorrhagic Fever Vaccine (Ebola, Sudan, Marburg, Lassa))                         | Preclinical          | GeoVax; United States Army Medical Research Institute of Infectious Diseases (USAMRIID)                                                                                                                                                                              |
| Marburg        | Undisclosed                                                                                            | Preclinical          | Undisclosed                                                                                                                                                                                                                                                          |
| Marburg        | DNA pWRG/MARV-GP(opt)                                                                                  | Preclinical          | United States Army Medical Research Institute of Infectious Diseases (USAMRIID); Ichor Medical Systems                                                                                                                                                               |
| Marburg        | Marburg RNA-Moderna                                                                                    | Preclinical          | Moderna Therapeutics                                                                                                                                                                                                                                                 |
| Marburg        | ChAdOx1-biLAMA                                                                                         | Preclinical          | University of Oxford                                                                                                                                                                                                                                                 |
| Marburg        | Undisclosed                                                                                            | Preclinical          | Undisclosed                                                                                                                                                                                                                                                          |
| Marburg        | GEO-EM05                                                                                               | Preclinical          | GeoVax                                                                                                                                                                                                                                                               |
| Marburg        | DNA pWRG/MARV-ANG(opt); Angola                                                                         | Preclinical          | United States Army Medical Research Institute of Infectious Diseases (USAMRIID); PharmaJet                                                                                                                                                                           |
| Marburg        | ChAdOX1 triFilo(2A)                                                                                    | Preclinical          | University of Oxford                                                                                                                                                                                                                                                 |
| Marburg        | rVSVN4CT1-MARVGP1 (VesiculoVax™ Vesicular Stomatitis Virus Vector)                                     | Preclinical          | Profectus BioSciences Inc; Yale University; University of Texas Medical Branch (UTMB); National Institute of Allergy and Infectious Diseases (NIAID); Joint Vaccine Acquisition Program (JVAP)                                                                       |
| Marburg        | pMARV is a DNA plasmid that encodes Marburg virus glycoprotein                                         | Preclinical          | Inovio Pharmaceuticals; Public Health Agency of Canada                                                                                                                                                                                                               |
| Marburg        | Attenuate VSV vector                                                                                   | Preclinical          | National Institute of Allergy and Infectious Diseases (NIAID); Public Health Agency of Canada; United States Army Medical Research Institute of Infectious Diseases (USAMRIID)                                                                                       |
| Marburg        | RABV based on chemically inactivated rabies virus virions containing MARV glycoprotein (GP) (FILORAB3) | Preclinical          | Thomas Jefferson University; National Institute of Allergy and Infectious Diseases (NIAID); The Geneva Foundation; United States Army Medical Research Institute of Infectious Diseases (USAMRIID); IDT Biologika GmbH; Infectious disease research institute (IDRI) |

## References related to the Marburg vaccine R&D pipeline:

1. Falzarano D, Geisbert TW, Feldmann H. Progress in filovirus vaccine development: evaluating the potential for clinical use. *Expert Rev Vaccines*. 2011;10(1):63–77.
2. Reynolds P, Marzi A. Ebola and Marburg virus vaccines. *Virus Genes*. 2017.
3. Sarwar UN, Costner P, Enama ME, et al. Safety and immunogenicity of DNA vaccines encoding Ebolavirus and Marburgvirus wild-type glycoproteins in a phase I clinical trial. *The Journal of infectious diseases*. 2015;211(4):549–57.
4. Clinicaltrials.gov. Evaluating an Ebola and a Marburg Vaccine in Uganda. A Phase IB Study to Evaluate the Safety and Immunogenicity of an Ebola DNA Plasmid Vaccine, VRC-EBODNA023-00-VP, and a Marburg DNA Plasmid Vaccine, VRC-MARDNA025-00-VP, in Healthy Adults in Kampala, Uganda [Internet]. 2009. Available from: <https://clinicaltrials.gov/show/NCT00997607>. [Accessed 26th January 2018]
5. Compans RW. A dual vaccine strategy against filovirus infection. NIAID; 2015. Available from: [https://projectreporter.nih.gov/project\\_info\\_description.cfm?aid=8837557&icde=34727062&ddparam=&ddvalue=&ddsub=&cr=30&csb=default&cs=ASC&pball=](https://projectreporter.nih.gov/project_info_description.cfm?aid=8837557&icde=34727062&ddparam=&ddvalue=&ddsub=&cr=30&csb=default&cs=ASC&pball=). [Accessed 26th January 2018]
6. Barker S. Novel multivalent vaccines against haemorrhagic fevers. 2018. Available from: <http://gtr.rcuk.ac.uk/projects?ref=971510>. [Accessed 26th January 2018]
7. Clinicaltrials.gov. MVA-BN@-Filo and Ad26.ZEBOV Vaccines in Healthy Volunteers. A Phase I Trial to Utilize Systems Biology Approaches to Examine the Safety, Immunogenicity, and 'Omics Response to MVA-BN@-Filo and Ad26.ZEBOV Vaccines in Healthy Volunteers [Internet]. 2016. Available from: [https://clinicaltrials.gov/ct2/show?cond=Marburg&intr=vaccine&rank=2&sel\\_rss=mod14](https://clinicaltrials.gov/ct2/show?cond=Marburg&intr=vaccine&rank=2&sel_rss=mod14). [Accessed 26th January 2018]
8. Clinicaltrials.gov. Ebola and Marburg Virus Vaccines. VRC 206: A Phase I Study to Evaluate the Safety and Immunogenicity of an Ebola DNA Plasmid Vaccine, VRC-EBODNA023-00-VP, and a Marburg DNA Plasmid Vaccine, VRC-MARDNA025-00-VP, in Healthy Adults [Internet]. 2008. Available from: [https://clinicaltrials.gov/ct2/show?cond=Marburg&intr=vaccine&rank=3&sel\\_rss=mod14](https://clinicaltrials.gov/ct2/show?cond=Marburg&intr=vaccine&rank=3&sel_rss=mod14). [Accessed 26th January 2018]
9. Kibuuka H, Berkowitz NM, Millard M, Enama ME, Tindikahwa A, Sekiziyivu AB, et al. Safety and immunogenicity of Ebola virus and Marburg virus glycoprotein DNA vaccines assessed separately and concomitantly in healthy Ugandan adults: a phase 1b, randomised, double-blind, placebo-controlled clinical trial. *Lancet* (London, England). 2015;385(9977):1545–54.
10. Sarwar UN, Costner P, Enama ME, Berkowitz N, Hu Z, Hendel CS, et al. Safety and immunogenicity of DNA vaccines encoding Ebolavirus and Marburgvirus wild-type glycoproteins in a phase I clinical trial. *The Journal of infectious diseases*. 2015. p. 549–57.
11. Sullivan NJ. Marburg vaccine development. NIAID; 2016. Available from: [https://projectreporter.nih.gov/project\\_info\\_description.cfm?aid=9339102&icde=34536725](https://projectreporter.nih.gov/project_info_description.cfm?aid=9339102&icde=34536725) [Accessed 26th January 2018]
12. Eldridge JH. RVSF vectored vaccine to protect against Ebola and Marburg viruses. Profectus; NIAID; 2016. Available from: [https://projectreporter.nih.gov/project\\_info\\_description.cfm?aid=9058458&icde=0](https://projectreporter.nih.gov/project_info_description.cfm?aid=9058458&icde=0) [Accessed 26th January 2018]
13. Shedlock DJ, Aviles J, Talbott KT, Wong G, Wu SJ, Villarreal DO, et al. Induction of broad cytotoxic T cells by protective DNA vaccination against Marburg and Ebola. *Molecular therapy: the journal of the American Society of Gene Therapy*. 2013;21(7):1432–44. Available from: [Accessed 26th January 2018]
14. Aman MJ. Structure-guided redesign of monoclonal antibodies targeting conserved filovirus epitopes. NIH. 2016. Available from: [https://projectreporter.nih.gov/project\\_info\\_description.cfm?aid=9200208&icde=0](https://projectreporter.nih.gov/project_info_description.cfm?aid=9200208&icde=0) [Accessed 26th January 2018]
15. Grant-Klein RJ, Altamura LA, Badger CV, Bounds CE, Van Deusen NM, Kwilas SA, et al. Codon-optimized filovirus DNA vaccines delivered by intramuscular electroporation protect cynomolgus macaques from lethal Ebola and Marburg virus challenges. *Human vaccines & immunotherapeutics*. 2015. p. 1991–2004.
16. Grant-Klein RJ, Van Deusen NM, Badger CV, Hannaman D, Dupuy LC, Schmaljohn CS. A multiagent filovirus DNA vaccine delivered by intramuscular electroporation completely protects mice from ebola and Marburg virus challenge. *Human vaccines & immunotherapeutics*. 2012. p. 1703–6.
17. Geisbert TW, Daddario-Dicaprio KM, Geisbert JB, Reed DS, Feldmann F, Grolla A, et al. Vesicular stomatitis virus-based vaccines protect nonhuman primates against aerosol challenge with Ebola and Marburg viruses. *Vaccine*. 2008. p. 6894–900.
18. Geisbert TW, Feldmann H. Recombinant vesicular stomatitis virus-based vaccines against Ebola and Marburg virus infections. *The Journal of infectious diseases*. 2011. p. S1075–81.
19. Geisbert TW, Geisbert JB, Leung A, et al. Single-injection vaccine protects nonhuman primates against infection with marburg virus and three species of ebola virus. *Journal of virology*. 2009. p. 7296–304.
20. Geisbert TW, Hensley LE, Geisbert JB, Leung A, Johnson JC, Grolla A, et al. Postexposure treatment of Marburg virus infection. *Emerging infectious diseases*. 2010. p. 1119–22.

21. Mire CE, Geisbert JB, Agans KN, et al. Durability of a vesicular stomatitis virus-based marburg virus vaccine in nonhuman primates. *PLoS One*. 2014;9(4):e94355.
22. Mire CE, Miller AD, Carville A, et al. Recombinant vesicular stomatitis virus vaccine vectors expressing filovirus glycoproteins lack neurovirulence in nonhuman primates. *PLoS Negl Trop Dis*. 2012;6(3):e1567.
23. Daddario-DiCaprio KM, Geisbert TW, Geisbert JB, , et al. Cross-protection against Marburg virus strains by using a live, attenuated recombinant vaccine. *Journal of virology*. 2006. p. 9659–66.
24. Daddario-DiCaprio KM, Geisbert TW, Stroher U, et al. Postexposure protection against Marburg haemorrhagic fever with recombinant vesicular stomatitis virus vectors in non-human primates: an efficacy assessment. *Lancet* (London, England). 2006;367(9520):1399–404.
25. Hampton T. Marburg vaccine shows promise: offers postexposure protection in monkeys. *JAMA*. 2006;295(20):2346.
26. Compans RW. A dual vaccine strategy against filovirus infection. NIAID; 2015. Available from: [https://projectreporter.nih.gov/project\\_info\\_description.cfm?aid=8837557&icde=0](https://projectreporter.nih.gov/project_info_description.cfm?aid=8837557&icde=0) [Accessed 26th January 2018]
27. Spearman P. Phase I trial of filovirus vaccine – VTEU. 2015. Available from: [https://projectreporter.nih.gov/project\\_info\\_details.cfm?aid=9161827&icde=34727062](https://projectreporter.nih.gov/project_info_details.cfm?aid=9161827&icde=34727062) [Accessed 26th January 2018]
28. Jahrling P. Pathogenesis and countermeasures of poxviruses, hemorrhagic fever viruses, MERS. NIAID; 2016. Available from: [https://projectreporter.nih.gov/project\\_info\\_description.cfm?aid=9360978&icde=34536725&ddparam=&ddvalu e=&ddsub=&cr=17&csb=default&cs=ASC&pball=](https://projectreporter.nih.gov/project_info_description.cfm?aid=9360978&icde=34536725&ddparam=&ddvalu e=&ddsub=&cr=17&csb=default&cs=ASC&pball=) [Accessed 26th January 2018]
29. Schnell MJ. Preclinical characterization of a multivalent killed filovirus/rabies vaccine. NIAID; 2016. Available from: [https://projectreporter.nih.gov/project\\_info\\_description.cfm?aid=8994257](https://projectreporter.nih.gov/project_info_description.cfm?aid=8994257). [Accessed 26th January 2018]
30. Willet M, Kurup D, Papaneri A, et al. Preclinical Development of Inactivated Rabies Virus–Based Polyvalent Vaccine Against Rabies and Filoviruses. *The Journal of infectious diseases*. 2015;212(Suppl 2):S414–S24.
31. Wang D, Hevey M, Juompan LY, et al. Complex adenovirus-vectored vaccine protects guinea pigs from three strains of Marburg virus challenges. *Virology*. 2006;353(2):324–32.
32. Wang D, Schmaljohn AL, Raja NU, et al. De novo syntheses of Marburg virus antigens from adenovirus vectors induce potent humoral and cellular immune responses. *Vaccine*. 2006;24(15):2975–86.
33. Dye JM, Warfield KL, Wells JB, et al. Virus-Like Particle Vaccination Protects Nonhuman Primates from Lethal Aerosol Exposure with Marburgvirus (VLP Vaccination Protects Macaques against Aerosol Challenges). *Viruses*. 2016;8(4):94.
34. Warfield KL, Posten NA, Swenson DL, et al. Filovirus-like particles produced in insect cells: immunogenicity and protection in rodents. *The Journal of infectious diseases*. 2007;196 Suppl 2:S421–9.
35. Gai W, Zheng X, Wang C, et al. Marburg virus-like particles produced in insect cells induce neutralizing antibodies in rhesus macaques. *J Med Virol*. 2017.
36. Geisbert TW, Bailey M, Geisbert JB, et al. Vector choice determines immunogenicity and potency of genetic vaccines against Angola Marburg virus in nonhuman primates. *Journal of virology*. 2010;84(19):10386–94.
37. Lee JS, Groebner JL, Hadjipanayis AG, et al. Multiagent vaccines vectored by Venezuelan equine encephalitis virus replicon elicits immune responses to Marburg virus and protection against anthrax and botulinum neurotoxin in mice. *Vaccine*. 2006;24(47–48):6886–92.
38. Martins K, Carra JH, Cooper CL, et al. Cross-protection conferred by filovirus virus-like particles containing trimeric hybrid glycoprotein. *Viral immunology*. 2015;28(1):62–70.
39. Swenson DL, Wang D, Luo M, et al. Vaccine to confer to nonhuman primates complete protection against multistrain Ebola and Marburg virus infections. *Clinical and vaccine immunology: CVI*. 2008;15(3):460–7.
40. Swenson DL, Warfield KL, Larsen T, Alves DA, Coberley SS, Bavari S. Monovalent virus-like particle vaccine protects guinea pigs and nonhuman primates against infection with multiple Marburg viruses. *Expert Rev Vaccines*. 2008;7(4):417–29.
41. Bukreyev A. Broadly specific needle-free vaccines against emerging and biothreat viruses. NIAID; 2016. Available from: [https://projectreporter.nih.gov/project\\_info\\_description.cfm?aid=9064746&icde=34536701&ddparam=&ddvalu e=&ddsub=&cr=1&csb=default&cs=ASC&pball=](https://projectreporter.nih.gov/project_info_description.cfm?aid=9064746&icde=34536701&ddparam=&ddvalu e=&ddsub=&cr=1&csb=default&cs=ASC&pball=). [Accessed 26th January 2018]
42. Bukreyev A. Broadly specific needle-free vaccines against emerging and biothreat viruses. NIAID; 2013. Available from: [https://projectreporter.nih.gov/myreport/internal/project\\_info\\_details.cfm?aid=8578747&icde=0&pid=](https://projectreporter.nih.gov/myreport/internal/project_info_details.cfm?aid=8578747&icde=0&pid=). [Accessed 26th January 2018]
43. Geovax. Hemorrhagic Fever Vaccine. 2017. Available from: <https://www.geovax.com/hemorrhagic-fever-vaccine-development-program.html>. [Accessed 26th January 2018]
44. Kalina WV, Warfield KL, Olinger GG, Bavari S. Discovery of common marburgvirus protective epitopes in a BALB/c mouse model. *Virol J*. 2009;6:132.

**Appendix Table 2.6: MERS-CoV vaccine R&D pipeline, preclinical through phase I**

| <b>Disease</b> | <b>Vaccine candidate</b>                                                                                                                        | <b>R&amp;D phase</b> | <b>Development Partners</b>                                                                                                                                                                                                                                                     |
|----------------|-------------------------------------------------------------------------------------------------------------------------------------------------|----------------------|---------------------------------------------------------------------------------------------------------------------------------------------------------------------------------------------------------------------------------------------------------------------------------|
| MERS-CoV       | MVA-MERS-S                                                                                                                                      | Phase I              | University of Munich LMU; Erasmus Medical Center; University of Marburg; German Centre for Infection Research (DZIF)                                                                                                                                                            |
| MERS-CoV       | ChAdOx1 MERS                                                                                                                                    | Phase I              | University of Oxford; Department of Health - UK; MRC Human Immunology Unit; UK Medical Research Council                                                                                                                                                                         |
| MERS-CoV       | GLS-5300 is a DNA plasmid vaccine that encodes the MERS CoV spike (S) glycoprotein                                                              | Phase I              | Inovio Pharmaceuticals; GeneOne Life Science; International Vaccine Institute (IVI); Public Health Agency of Canada; University of Laval; University of Manitoba; University of Pennsylvania; University of Washington; University of South Florida Morsani College of Medicine |
| MERS-CoV       | RABV-MERS RABV contains spike protein of the MERS-CoV S1 domain fused to the RABV G protein C terminus (BNSP333-S1). Live and deactivated irons | Preclinical          | Thomas Jefferson University; IDT Biologika GmbH; National Institute of Allergy and Infectious Diseases (NIAID); University of Maryland; University of North Carolina; University of Colorado                                                                                    |
| MERS-CoV       | RBD fused with human Fc/ Mersmab1                                                                                                               | Preclinical          | New York Blood Center; Baylor College Medicine; University of Texas Medical Branch (UTMB)                                                                                                                                                                                       |
| MERS-CoV       | Full length S trimers/ nanoparticle                                                                                                             | Preclinical          | Novavax, Inc.                                                                                                                                                                                                                                                                   |
| MERS-CoV       | Venezuelan equine encephalitis replicons (VRP) expressing nucleocapsid proteins                                                                 | Preclinical          | University of Iowa; The First Affiliated Hospital of Guangzhou Medical University; University of North Carolina; Mayo Clinic                                                                                                                                                    |
| MERS-CoV       | VRP expressing spike protein                                                                                                                    | Preclinical          | University of Iowa; University of North Carolina at Chapel Hill                                                                                                                                                                                                                 |
| MERS-CoV       | Live-attenuated recombinant MERS-CoVs                                                                                                           | Preclinical          | University of Iowa; German Centre for Infection Research (DZIF); King Abdullah International Medical Research Center; University of Kent; University of Marburg; CNB-CSIC                                                                                                       |
| MERS-CoV       | MERS RNA                                                                                                                                        | Preclinical          | Moderna Therapeutics                                                                                                                                                                                                                                                            |
| MERS-CoV       | MERS Sclamp                                                                                                                                     | Preclinical          | The University of Queensland; Australian Government - National Health and Medical Research Council (NHMRC)                                                                                                                                                                      |
| MERS-CoV       | mammalian subunit with triadjuvant                                                                                                              | Preclinical          | Vaccine and Infectious Disease Organization-International Vaccine Centre (VIDO-InterVac); King Saud bin Abdulaziz University for Health Sciences                                                                                                                                |
| MERS-CoV       | replication defective Ad5 vectored                                                                                                              | Preclinical          | Vaccine and Infectious Disease Organization-International Vaccine Centre (VIDO-InterVac); King Saud bin Abdulaziz University for Health Sciences                                                                                                                                |
| MERS-CoV       | live attenuated camelpox (Ducapox) vectored                                                                                                     | Preclinical          | Vaccine and Infectious Disease Organization-International Vaccine Centre (VIDO-InterVac); Central Veterinary Research Lab, Dubai, UAE                                                                                                                                           |
| MERS-CoV       | MERS vaccine                                                                                                                                    | Preclinical          | Vaxine Pty Ltd, Australia                                                                                                                                                                                                                                                       |
| MERS-CoV       | DNA pWRG/MERScoV(opt)                                                                                                                           | Preclinical          | United States Army Medical Research Institute of Infectious Diseases (USAMRIID); PharmaJet                                                                                                                                                                                      |
| MERS-CoV       | Measles S recombinant measles virus expressing the spike glycoprotein                                                                           | Preclinical          | Themis Bioscience GmbH                                                                                                                                                                                                                                                          |

## References related to the MERS-CoV vaccine R&D pipeline:

1. Almazán F, DeDiego ML, Sola I, et al. Engineering a Replication-Competent, Propagation-Defective Middle East Respiratory Syndrome Coronavirus as a Vaccine Candidate. *mBio*. 2013;4(5):e00650–13.
2. Modjarrad K. MERS-CoV vaccine candidates in development: The current landscape. *Vaccine*. 2016;34(26):2982–7.
3. Modjarrad K, Moorthy VS, Ben Embarek P, Van Kerkhove M, Kim J, Kieny MP. A roadmap for MERS-CoV research and product development: report from a World Health Organization consultation. *Nature medicine*. 2016;22(7):701–5.
4. Coleman CM, Liu YV, Mu H, et al. Purified coronavirus spike protein nanoparticles induce coronavirus neutralizing antibodies in mice. *Vaccine*. 2014;32(26):3169–74.
5. Jean-Louis E, Christopher JD, Ryan EW, et al. Toward Developing a Preventive MERS-CoV Vaccine—Report from a Workshop Organized by the Saudi Arabia Ministry of Health and the International Vaccine Institute, Riyadh, Saudi Arabia, November 14–15, 2015. *Emerging Infectious Disease journal*. 2016;22(8).
6. VGXI. IIVI, GeneOne Life Science join forces to develop MERS-CoV vaccine: VGXI; 2016. Available from: <http://vgxii.com/ivi-geneone-life-science-join-forces-to-develop-mers-cov-vaccine/>. [Accessed 26th January 2018]
7. Clinicaltrials.gov. Phase I, Open Label Dose Ranging Safety Study of GLS-5300 in Healthy Volunteers [Internet]. 2016. Available from: <https://clinicaltrials.gov/ct2/show/NCT02670187>. [Accessed 26th January 2018]
8. UK Vaccine Network, prepared by Karl Simpson. Status of vaccine candidates for 13 infectious diseases with epidemic potential in low-income countries. [Presentation]. 2016. (Unpublished)
9. Greffex. Mers\_Greffex. 2018. Available from: <http://www.greffex.com/vaccines/mers/>. [Accessed 26th January 2018]
10. Guo X, Deng Y, Chen H, et al. Systemic and mucosal immunity in mice elicited by a single immunization with human adenovirus type 5 or 41 vector-based vaccines carrying the spike protein of Middle East respiratory syndrome coronavirus. *Immunology*. 2015;145(4):476–84.
11. Malczyk AH, Kupke A, Prufer S, et al. A Highly Immunogenic and Protective Middle East Respiratory Syndrome Coronavirus Vaccine Based on a Recombinant Measles Virus Vaccine Platform. *Journal of virology*. 2015;89(22):11654–67.
12. Haagmans BL, van den Brand JM, Raj VS, et al. An orthopoxvirus-based vaccine reduces virus excretion after MERS-CoV infection in dromedary camels. *Science (New York, NY)*. 2016;351(6268):77–81.
13. Song F, Fux R, Provacía LB, et al. Middle East Respiratory Syndrome Coronavirus Spike Protein Delivered by Modified Vaccinia Virus Ankara Efficiently Induces Virus-Neutralizing Antibodies. *Journal of virology*. 2013;87(21):11950–4.
14. Volz A, Kupke A, Song F, et al. Protective Efficacy of Recombinant Modified Vaccinia Virus Ankara Delivering Middle East Respiratory Syndrome Coronavirus Spike Glycoprotein. *Journal of virology*. 2015(1098–5514 (Electronic)).
15. Alharbi NK, Padron-Regalado E, Thompson CP, et al. ChAdOx1 and MVA based vaccine candidates against MERS-CoV elicit neutralising antibodies and cellular immune responses in mice. *Vaccine*. 2017;35(30):3780–8.
16. Roger N. Self-Administered Vaccines Directed Against Plague and MERS. Proxima Concepts Ltd Innovate UK; 2017. Available from: <http://gtr.rcuk.ac.uk/projects?ref=972228>. [Accessed 26th January 2018]
17. UK Zika research awarded share of £120 million vaccine fund [press release]. Department of Health, England, 2016.
18. Jenner Institute Outbreak Pathogens: New MERS Vaccine Programme: Jenner Institute; Available from: <http://www.jenner.ac.uk/new-mers-vaccine-programme>. [Accessed 26th January 2018]
19. Munster VJ, Wells D, Lambe T, et al. Protective efficacy of a novel simian adenovirus vaccine against lethal MERS-CoV challenge in a transgenic human DPP4 mouse model. *npj Vaccines*. 2017;2(1):28.
20. Graham B. Coronavirus vaccine development. NIAID; 2015. Available from: [https://projectreporter.nih.gov/project\\_info\\_description.cfm?aid=9161779&icde=0](https://projectreporter.nih.gov/project_info_description.cfm?aid=9161779&icde=0). [Accessed 26th January 2018]
21. Subbarao K. Vaccines, immunoprophylaxis, and immunotherapy for coronaviruses. NIAID: NIAID; 2015. Available from: [https://projectreporter.nih.gov/project\\_info\\_details.cfm?aid=9161717](https://projectreporter.nih.gov/project_info_details.cfm?aid=9161717). [Accessed 26th January 2018]
22. Wang L, Shi W, Joyce MG, Modjarrad K, Zhang Y, Leung K, et al. Evaluation of candidate vaccine approaches for MERS-CoV. *Nature Communications*. 2015;6:7712.
23. Christoph Wirblich, Christopher M. Coleman, Drishya Kurup, Tara S. Abraham, John G. Bernbaum, Peter B. Jahrling, et al. One-Health: A Safe, Efficient Dual-use Vaccine for Humans and Animals against MERS-CoV and Rabies Virus. *Journal of virology*. 2016.
24. Jahrling P. Pathogenesis and countermeasures of poxviruses, hemorrhagic fever viruses, Mers NIAID: NIAID; 2016. Available from: [https://projectreporter.nih.gov/project\\_info\\_details.cfm?aid=9360978&icde=32708116](https://projectreporter.nih.gov/project_info_details.cfm?aid=9360978&icde=32708116). [Accessed 26th January 2018]

25. New York Blood Center . NYBC Scientists Partner in New Discovery for Development of MERS Vaccines. 2016. Available from: <http://nybloodcenter.org/about-us/press-room/nybc-scientists-partner-new-development-mers-vaccine/>. [Accessed 26th January 2018]
26. Du L. A novel nanobody with good druggability to prevent and treat Mers-cov infection. New York Blood Center; NIAID; 2016. Available from: [https://projectreporter.nih.gov/project\\_info\\_details.cfm?aid=9226400&icde=32708116](https://projectreporter.nih.gov/project_info_details.cfm?aid=9226400&icde=32708116). [Accessed 26th January 2018]
27. Du L, Kou Z, Ma C, et al. A truncated receptor-binding domain of MERS-CoV spike protein potently inhibits MERS-CoV infection and induces strong neutralizing antibody responses: implication for developing therapeutics and vaccines. *PLoS One*. 2013;8(12):e81587.
28. Du L, Zhao G, Kou Z, et al. Identification of a Receptor-Binding Domain in the S Protein of the Novel Human Coronavirus Middle East Respiratory Syndrome Coronavirus as an Essential Target for Vaccine Development. *Journal of virology*. 2013;87(17):9939–42.
29. Lustigman S. Enhancing potency of the Mers vaccine by a novel asp-1+alum adjuvant combination New York Blood Center; NIAID; 2016. Available from: [https://projectreporter.nih.gov/project\\_info\\_details.cfm?aid=9108116&icde=32708116](https://projectreporter.nih.gov/project_info_details.cfm?aid=9108116&icde=32708116) [Accessed 26th January 2018]
30. Ma C, Li Y, Wang L, et al. Intranasal vaccination with recombinant receptor-binding domain of MERS-CoV spike protein induces much stronger local mucosal immune responses than subcutaneous immunization: Implication for designing novel mucosal MERS vaccines. *Vaccine*. 2014;32(18):2100–8.
31. Tai W, Zhao G, Sun S, et al. A recombinant receptor-binding domain of MERS-CoV in trimeric form protects human dipeptidyl peptidase 4 (hDPP4) transgenic mice from MERS-CoV infection. *Virology*. 2016;499:375–82.
32. Tang J, Zhang N, Tao X, et al. Optimization of antigen dose for a receptor-binding domain-based subunit vaccine against MERS coronavirus. *Human vaccines & immunotherapeutics*. 2015;11(5):1244–50.
33. Zhang N, Channappanavar R, Ma C, et al. Identification of an ideal adjuvant for receptor-binding domain-based subunit vaccines against Middle East respiratory syndrome coronavirus. *Cellular & molecular immunology*. 2016;13(2):180–90.
34. Lan J, Deng Y, Chen H, et al. Tailoring Subunit Vaccine Immunity with Adjuvant Combinations and Delivery Routes Using the Middle East Respiratory Coronavirus (MERS-CoV) Receptor-Binding Domain as an Antigen. *Plos one*. 2014;9(11):e112602.
35. Lan J, Yao Y, Deng Y, et al. Recombinant Receptor Binding Domain Protein Induces Partial Protective Immunity in Rhesus Macaques Against Middle East Respiratory Syndrome Coronavirus Challenge. *EBioMedicine*. 2015;2(10):1438–46.
36. Yang Y, Deng Y, Wen B, et al. The amino acids 736–761 of the MERS-CoV spike protein induce neutralizing antibodies: implications for the development of vaccines and antiviral agents. *Viral immunology*. 2014;27(10):543–50.
37. Muthumani K, Falzarano D, Reuschel EL, et al. A synthetic consensus anti-spike protein DNA vaccine induces protective immunity against Middle East respiratory syndrome coronavirus in nonhuman primates. *Sci Transl Med*. 2015(1946–6242 (Electronic)).
38. Wang C, Zheng X, Gai W, et al. Novel chimeric virus-like particles vaccine displaying MERS-CoV receptor-binding domain induce specific humoral and cellular immune response in mice. *Antiviral Research*. 2017;140:55–61.
39. Wang C, Zheng X, Gai W, et al. MERS-CoV virus-like particles produced in insect cells induce specific humoral and cellular immunity in rhesus macaques. *Oncotarget*. 2017;8(8):12686–94.
40. Agrawal AS, Tao X, Algaissi A, et al. Immunization with inactivated Middle East Respiratory Syndrome coronavirus vaccine leads to lung immunopathology on challenge with live virus. *Human vaccines & immunotherapeutics*. 2016;12(9):2351–6.
41. Zhao J, Zhao J, Mangalam Ashutosh K, et al. Airway Memory CD4+ T Cells Mediate Protective Immunity against Emerging Respiratory Coronaviruses. *Immunity*. 2016;44(6):1379–91.
42. Zhao J, Li K, Wohlford-Lenane C, et al. Rapid generation of a mouse model for Middle East respiratory syndrome. *Proceedings of the National Academy of Sciences of the United States of America*. 2014;111(13):4970–5.
43. Jiaming L, Yanfeng Y, Yao D, et al. The recombinant N-terminal domain of spike proteins is a potential vaccine against Middle East respiratory syndrome coronavirus (MERS-CoV) infection. *Vaccine*. 2017;35(1):10–8.
44. Perlman S. Project 4. University of Iowa; NIAID; 2017. Available from: [https://projectreporter.nih.gov/project\\_info\\_description.cfm?aid=9209901&icde=0](https://projectreporter.nih.gov/project_info_description.cfm?aid=9209901&icde=0). [Accessed 26th January 2018]
45. Du L, Jiang S. Middle East respiratory syndrome: current status and future prospects for vaccine development. *Expert opinion on biological therapy*. 2015;15(11):1647–51.
46. Okba NMA, Raj VS, Haagmans BL. Middle East respiratory syndrome coronavirus vaccines: current status and novel approaches. *Current Opinion in Virology*. 2017;23:49–58.

47. Uyeki TM, Erlandson KJ, Korch G, et al. Development of Medical Countermeasures to Middle East Respiratory Syndrome Coronavirus. *Emerging infectious diseases*. 2016;22(7).
48. Zhang N, Jiang S, Du L. Current advancements and potential strategies in the development of MERS-CoV vaccines. *Expert review of vaccines*. 2014;13(6):761–74.
49. Ma C, Wang L, Tao X, et al. Searching for an ideal vaccine candidate among different MERS coronavirus receptor-binding fragments—The importance of immunofocusing in subunit vaccine design. *Vaccine*. 2014;32(46):6170–6.
50. Du L, Tai W, Yang Y, et al. Introduction of neutralizing immunogenicity index to the rational design of MERS coronavirus subunit vaccines. *Nat. Commun*. 2016; 7:13473.
51. Tai W, Wang Y, Fett CA, Zhao G, Li F, Perlman S, et al. Recombinant receptor-binding domains of multiple MERS-coronaviruses induce cross-neutralizing antibodies against divergent human and camel MERS-coronaviruses and antibody-escape mutants. *J. Virol*. 2017; 91(1): e01651–16.
52. Du L, Yang Y, Zhou Y, Lu L, Li F, Jiang S. MERS-CoV spike protein: a key vaccine and antiviral therapeutic target. *Expert Opin Ther Targets*. 2017; 21(2): 131–143.

**Appendix Table 2.7: Nipah vaccine R&D pipeline, preclinical**

| <b>Disease</b> | <b>Vaccine candidate</b>                                                                                                                                                  | <b>R&amp;D phase</b> | <b>Development Partners</b>                                                                                                                                                                                                                                                                                  |
|----------------|---------------------------------------------------------------------------------------------------------------------------------------------------------------------------|----------------------|--------------------------------------------------------------------------------------------------------------------------------------------------------------------------------------------------------------------------------------------------------------------------------------------------------------|
| Nipah          | HeV sG (Hendra virus soluble G protein)                                                                                                                                   | Preclinical          | Zoetis Inc.; Uniformed Services University of the Health Sciences (USU); Commonwealth Scientific and Industrial Research Organisation (CSIRO); Duke-NUS Graduate Medical School; Profectus Biosciences; University of Manitoba                                                                               |
| Nipah          | rMV-NiV-G                                                                                                                                                                 | Preclinical          | University of Tokyo; National Institute of Infectious Diseases, Japan; Themis Bioscience GmbH                                                                                                                                                                                                                |
| Nipah          | VLP: pCAGGS- G, F, and M protein                                                                                                                                          | Preclinical          | University of Texas Medical Branch (UTMB); Commonwealth Scientific and Industrial Research Organisation (CSIRO); Mount Sinai School of Medicine                                                                                                                                                              |
| Nipah          | NiV soluble molecular clamp stabilised F protein                                                                                                                          | Preclinical          | Department of Health - UK; The Pirbright Institute; University of Oxford; University of Queensland; CSIRO Health and Biosecurity; Australian Government - National Health and Medical Research Council (NHMRC); University of Malaya; Assam Agricultural University; Monash University Malaysia; Zoetis Inc. |
| Nipah          | ChAdOx1 Nipah (Chimpanzee adenoviral vectored NiV G protein)                                                                                                              | Preclinical          | Department of Health - UK; The Pirbright Institute; University of Oxford; University of Queensland; CSIRO Health and Biosecurity; University of Malaya; Assam Agricultural University; Monash University Malaysia; Zoetis Inc.                                                                               |
| Nipah          | Undisclosed                                                                                                                                                               | Preclinical          | Undisclosed                                                                                                                                                                                                                                                                                                  |
| Nipah          | Undisclosed                                                                                                                                                               | Preclinical          | Undisclosed                                                                                                                                                                                                                                                                                                  |
| Nipah          | Undisclosed                                                                                                                                                               | Preclinical          | Undisclosed                                                                                                                                                                                                                                                                                                  |
| Nipah          | NiV soluble G protein subunit                                                                                                                                             | Preclinical          | Department of Health - UK; The Pirbright Institute; University of Oxford; University of Queensland; CSIRO Health and Biosecurity; University of Malaya; Assam Agricultural University; Monash University Malaysia; Zoetis Inc.                                                                               |
| Nipah          | VSV-HeV sG recombinant vesicular stomatitis virus (VSV), expressing either the codon-optimized or the wild-type (wt) HeV glycoprotein (G) gene or Nipah (codon optimized) | Preclinical          | Thomas Jefferson University; National Institute of Allergy and Infectious Diseases (NIAID); Rocky Mountain Laboratories                                                                                                                                                                                      |
| Nipah          | RABV-HeV G recombinant rabies virus, expressing either the codon-optimized or the wild-type (wt) HeV glycoprotein (G) gene or Nipah G (codon optimized)                   | Preclinical          | Thomas Jefferson University; National Institute of Allergy and Infectious Diseases (NIAID); Rocky Mountain Laboratories                                                                                                                                                                                      |



## References related to the Nipah vaccine R&D pipeline:

1. McEachern JA, Bingham J, Crameri G, et al. A recombinant subunit vaccine formulation protects against lethal Nipah virus challenge in cats. *Vaccine*. 2008(0264–410X (Print)).
2. Mungall BA, Middleton D, Crameri G, Bingham J, Halpin K, Russell G, et al. Feline Model of Acute Nipah Virus Infection and Protection with a Soluble Glycoprotein-Based Subunit Vaccine. *Journal of virology*. 2006;80(24):12293–302.
3. Satterfield BA, Dawes BE, Milligan GN. Status of vaccine research and development of vaccines for Nipah virus. *Vaccine*. 2016(1873–2518 (Electronic)).
4. Pallister JA, Klein R, Arkinstall R, et al. Vaccination of ferrets with a recombinant G glycoprotein subunit vaccine provides protection against Nipah virus disease for over 12 months. *Virology Journal*. 2013;10:237–.
5. Bossart KN, Rockx B, Feldmann F, et al. A Hendra Virus G Glycoprotein Subunit Vaccine Protects African Green Monkeys from Nipah Virus Challenge. *Science translational medicine*. 2012;4(146):146ra07–ra07.
6. Mire E, Versteeg KM, Cross RW, et al. Single injection recombinant vesicular stomatitis virus vaccines protect ferrets against lethal Nipah virus disease. *Virology Journal*. 2013(1743–422X (Electronic)).
7. Chattopadhyay A, Rose JK. Complementing Defective Viruses That Express Separate Paramyxovirus Glycoproteins Provide a New Vaccine Vector Approach. *Journal of virology*. 2011;85(5):2004–11.
8. Lo MK, Bird BH, Chattopadhyay A, Drew CP, Martin BE, Coleman JD, et al. Single-Dose Replication-Defective VSV-based Nipah Virus Vaccines Provide Protection from Lethal Challenge in Syrian Hamsters. *Antiviral research*. 2014;101:10.1016/j.antiviral.2013.10.012.
9. DeBuyscher BL, Scott D, Marzi A, Prescott J, Feldmann H. Single-dose live-attenuated Nipah virus vaccines confer complete protection by eliciting antibodies directed against surface glycoproteins. *Vaccine*. 2014(1873–2518 (Electronic)).
10. Kurup D, Wirblich C, Feldmann H, Marzi A, Schnell MJ. Rhabdovirus-Based Vaccine Platforms against Henipaviruses. *Journal of virology*. 2015;89(1):144–54.
11. Guillaume-Vasselín V, Lemaitre L, Dhondt KP, Tedeschi L, Poulard A, Charreyre C, et al. Protection from Hendra virus infection with Canarypox recombinant vaccine. *Npj Vaccines*. 2016;1:16003.
12. Poulet H, Minke J, Pardo MC, Juillard V, Nordgren B, Audonnet J-C. Development and registration of recombinant veterinary vaccines: The example of the canarypox vector platform. *Vaccine*. 2007;25(30):5606–12.
13. Weingartl HM, Berhane Y, Caswell JL, Loosmore S, Audonnet J-C, Roth JA, et al. Recombinant Nipah Virus Vaccines Protect Pigs against Challenge. *Journal of virology*. 2006;80(16):7929–38.
14. Ploquin A, Szécsi J, Mathieu C, et al. Protection Against Henipavirus Infection by Use of Recombinant Adeno-Associated Virus–Vector Vaccines. *The Journal of infectious diseases*. 2012;207(3):469–78.
15. Yoneda M, Georges-Courbot M-C, Ikeda F, et al. Recombinant Measles Virus Vaccine Expressing the Nipah Virus Glycoprotein Protects against Lethal Nipah Virus Challenge. *PLoS One*. 2013;8(3):e58414.
16. Defang GN, Khetawat D, Broder CC, Quinnan GV. Induction of neutralizing antibodies to hendra and nipah glycoproteins using a venezuelan equine encephalitis virus in vivo expression system. *Vaccine*. 2010;29(2):212–20.
17. Kong D, Wen Z, Su H, Ge J, Chen W, Wang X, et al. Newcastle disease virus-vectored Nipah encephalitis vaccines induce B and T cell responses in mice and long-lasting neutralizing antibodies in pigs. *Virology*. 2012;432(2):327–35.
18. Profectus biosciences. Additional Prophylactic Vaccines Profectus Bioscience. 2017 .Available from: <http://www.profectusbiosciences.com/pipeline/additionalprophylactic.html#nipah>. [Accessed 26th January 2018]
19. Fouts TR. Development of sG as a human vaccine against Nipah/Hendra. NIH; 2016. Available from: [https://projectreporter.nih.gov/project\\_info\\_description.cfm?aid=9055627&icde=0](https://projectreporter.nih.gov/project_info_description.cfm?aid=9055627&icde=0). [Accessed 26th January 2018]
20. Walpita PN. Vaccine potential of Nipah virus-like particles. NIAID; 2013. Available from: [https://projectreporter.nih.gov/project\\_info\\_description.cfm?aid=8604133&icde=37837475&ddparam=&ddvalue=&ddsub=&cr=1&csb=default&cs=ASC&pball=](https://projectreporter.nih.gov/project_info_description.cfm?aid=8604133&icde=37837475&ddparam=&ddvalue=&ddsub=&cr=1&csb=default&cs=ASC&pball=). [Accessed 26th January 2018]
21. DeBuyscher BL, Scott D, Thomas T, Feldmann H, Prescott J. Peri-exposure protection against Nipah virus disease using a single-dose recombinant vesicular stomatitis virus-based vaccine. *Npj Vaccines*. 2016;1:16002.
22. Prescott J, DeBuyscher BL, Feldmann F, et al. Single-dose live-attenuated vesicular stomatitis virus-based vaccine protects African green monkeys from Nipah virus disease. *Vaccine*. 2015;33(24):2823–9.
23. Wang XJ, Wang OH, Ge JY, Hu S, Bu ZG. Generation of recombinant vaccinia virus expressing attachment glycoprotein of Nipah virus. *Wei Sheng Wu Xue Bao*. 2006;46(4):644–8.
24. Wang XJ, Ge JY, Wang QH, Hu S, Lin XM, Bu ZG. Study on the DNA immunogenicity of fusion and attachment glycoproteins of Nipah virus. *Bing Du Xue Bao*. 2008;24(1):47–52.
25. Walpita P, Barr J, Sherman M, Basler CF, Wang L. Vaccine potential of Nipah virus-like particles. *PLoS One*. 2011;6(4):e18437.

26. Cosby L. Development of a Novel Nipah Virus Pre-Fusion Protein Recombinant Vaccine. Agri-Food and Biosciences Institute Innovate UK; 2017. Available from: <http://gtr.rcuk.ac.uk/projects?ref=971523>. [Accessed 26th January 2018]
27. Graham S. A Nipah vaccine to eliminate porcine reservoirs and safeguard human health. The Pirbright Institute; Innovate UK; 2018. Available from: <http://gtr.rcuk.ac.uk/projects?ref=971555>. [Accessed 26th January 2018]

**Appendix Table 2.8: Rift Valley fever vaccine R&D pipeline, preclinical through phase II**

| <b>Disease</b>    | <b>Vaccine candidate</b>                                | <b>R&amp;D phase</b> | <b>Development Partners</b>                                                                                                                                                                                                       |
|-------------------|---------------------------------------------------------|----------------------|-----------------------------------------------------------------------------------------------------------------------------------------------------------------------------------------------------------------------------------|
| Rift Valley fever | TSI-GSD 200                                             | Phase II             | U.S. Army Medical Research and Materiel Command; Salk Institute                                                                                                                                                                   |
| Rift Valley fever | RVF MP-12                                               | Phase II             | United States Army Medical Research Institute of Infectious Diseases (USAMRIID); Salk Institute                                                                                                                                   |
| Rift Valley fever | DNA vaccine pCMV-Ub-N                                   | Preclinical          | Centro de Investigación en Sanidad Animal, INIA, Valdeolmos, Madrid, Spain                                                                                                                                                        |
| Rift Valley fever | DNA Vaccine, pCMV-M4 encoding mature GnGc glycoproteins | Preclinical          | Centro de Investigación en Sanidad Animal, INIA, Valdeolmos, Madrid, Spain                                                                                                                                                        |
| Rift Valley fever | NDFL-GnGc, vector based                                 | Preclinical          | Wageningen Bioveterinary Research                                                                                                                                                                                                 |
| Rift Valley fever | - Gn-e Subunit Protein                                  | Preclinical          | Wageningen Bioveterinary Research; Utrecht University                                                                                                                                                                             |
| Rift Valley fever | - Gn/Gc VLP with/without Adjuvant (Stimune)             | Preclinical          | Wageningen Bioveterinary Research; Utrecht University                                                                                                                                                                             |
| Rift Valley fever | Undisclosed                                             | Preclinical          | Undisclosed                                                                                                                                                                                                                       |
| Rift Valley fever | RVF - Bovine Herpesvirus-4 (attenuated)                 | Preclinical          | Plymouth University; Department of Health - UK; Defence Science and Technology Laboratory (Dstl); Kansas State University; University of Liege                                                                                    |
| Rift Valley fever | Name yet to be assigned as early stage research         | Preclinical          | Leaf Expression Systems; Department of Health - UK                                                                                                                                                                                |
| Rift Valley fever | ChAdOx1 RVF                                             | Preclinical          | University of Oxford; Department of Health - UK; MRC Uganda Virus Research Institute; Pirbright Institute                                                                                                                         |
| Rift Valley fever | NLLV-RIFT                                               | Preclinical          | Institut Pasteur; Institut Pasteur de Dakar; Theravectys                                                                                                                                                                          |
| Rift Valley fever | Gn and Gc expressed in LSDV                             | Preclinical          | Vaccine and Infectious Disease Organization-International Vaccine Centre (VIDO-InterVac); University of Alberta; The National Centre for Foreign Animal Disease (NCFAD), Canada; Onderstepoort Veterinary Institute, South Africa |
| Rift Valley fever | 4-segmented RVFV                                        | Preclinical          | Wageningen Bioveterinary Research; BunyaVax B.V.                                                                                                                                                                                  |
| Rift Valley fever | MVA Expressing GnGc Glycoproteins                       | Preclinical          | University of Oxford; Centro de Investigación en Sanidad Animal, INIA, Valdeolmos, Madrid, Spain                                                                                                                                  |
| Rift Valley fever | DNA based, baculovirus expressed M segments             | Preclinical          | United States Army Medical Research Institute of Infectious Diseases (USAMRIID)                                                                                                                                                   |
| Rift Valley fever | RNA particles (RRP/NSR)                                 | Preclinical          | Wageningen Bioveterinary Research; BunyaVax B.V.                                                                                                                                                                                  |
| Rift Valley fever | RNA particles (NSR-Gn)                                  | Preclinical          | Wageningen Bioveterinary Research; Utrecht University; BunyaVax B.V.                                                                                                                                                              |

## References related to the RVF vaccine R&D pipeline:

1. Spik K, Shurtleff A, McElroy AK, Guttieri MC, Hooper JW, SchmalJohn C. Immunogenicity of combination DNA vaccines for Rift Valley fever virus, tick-borne encephalitis virus, Hantaan virus, and Crimean Congo hemorrhagic fever virus. *Vaccine*. 2006;24(21):4657–66.
2. Leaf Expression Systems. Leaf Expression Systems have been awarded the following grants. 2018. Available from: <https://www.leafexpressionsystems.co.uk/news-and-events/grants/>. [Accessed 26th January 2018]
3. Lagerqvist N, Naslund J, Lundkvist A, Bouloy M, Ahlm C, Bucht G. Characterisation of immune responses and protective efficacy in mice after immunisation with Rift Valley Fever virus cDNA constructs. *Viol J*. 2009;6:6.
4. Koehler JW, Smith JM, Ripoll DR, et al. A fusion-inhibiting peptide against Rift Valley fever virus inhibits multiple, diverse viruses. *PLoS Negl Trop Dis*. 2013;7(9):e2430.
5. Liu L, Celma CC, Roy P. Rift Valley fever virus structural proteins: expression, characterization and assembly of recombinant proteins. *Virology journal*. 2008;5(1):82.
6. Boshra H, Lorenzo G, Busquets N, Brun A. Rift valley fever: recent insights into pathogenesis and prevention. *Journal of virology*. 2011;85(13):6098–105.
7. Faburay B, LaBeaud AD, McVey DS, Wilson WC, Richt JA. Current Status of Rift Valley Fever Vaccine Development. *Vaccines*. 2017;5(3):29.
8. Hartman A. Rift Valley Fever. *Clin Lab Med*. 2017;37(2):285–301.
9. Ikegami T, Makino S. Rift valley fever vaccines. *Vaccine*. 2009;27 Suppl 4:D69–72.
10. Kortekaas J. One Health approach to Rift Valley fever vaccine development. *Antiviral Res*. 2014;106:24–32.
11. Kortekaas J, Zingeser J, de Leeuw P, de La Rocque S, Unger H, Moormann RJ. Rift Valley Fever Vaccine Development, Progress and Constraints. *Emerging infectious diseases*. 2011;17(9):e1.
12. Mansfield KL, Banyard AC, McElhinney L, et al. Rift Valley fever virus: A review of diagnosis and vaccination, and implications for emergence in Europe. *Vaccine*. 2015;33(42):5520–31.
13. Pepin M, Bouloy M, Bird BH, Kemp A, Paweska J. Rift Valley fever virus (Bunyaviridae: Phlebovirus): an update on pathogenesis, molecular epidemiology, vectors, diagnostics and prevention. *Vet Res*. 2010;41(6):61.
14. Terasaki K, Tercero BR, Makino S. Single-cycle replicable Rift Valley fever virus mutants as safe vaccine candidates. *Virus research*. 2016;216:55–65.
15. Clinicaltrials.gov. Safety/Immunogenicity/Genetic Drift of MP-12 Rift Valley Fever Vaccine (MP-12) [Internet]. 2006 [cited 18052017]. Available from: <https://clinicaltrials.gov/ct2/show/study/NCT00415051>. [Accessed 26th January 2018]
16. Warimwe GM, Lorenzo G, Lopez-Gil E, Reyes-Sandoval A, Cottingham MG, Spencer AJ, et al. Immunogenicity and efficacy of a chimpanzee adenovirus-vectored Rift Valley Fever vaccine in mice. *Virology Journal*. 2013;10(1):349.
17. Clinicaltrials.gov. Safety and Immunogenicity Study of Rift Valley Fever Vaccine (RVF). Parts A&B: Evaluation of the Safety and Immunogenicity of Rift Valley Fever Vaccine, Inactivated, Dried (TSI-GSD 200), A Phase 2 Study [Internet]. 2007 [cited 06062017]. Available from: [https://clinicaltrials.gov/ct2/show/NCT00584194?cond=Rift+Valley&intr=vaccine&rank=1&submit\\_fld\\_opt=](https://clinicaltrials.gov/ct2/show/NCT00584194?cond=Rift+Valley&intr=vaccine&rank=1&submit_fld_opt=). [Accessed 26th January 2018]
18. Clinicaltrials.gov. Safety and Immunogenicity Study of Rift Valley Fever Vaccine, Inactivated (RVF) [Internet]. 2016 [cited 15052017]. Available from: <https://clinicaltrials.gov/ct2/show/NCT00869713?term=TSI-GSD+200&rank=1>. [Accessed 26th January 2018]
19. Rusnak JM, Gibbs P, Boudreau E, Clizbe DP, Pittman P. Immunogenicity and safety of an inactivated Rift Valley fever vaccine in a 19-year study. *Vaccine*. 2011;29(17):3222–9.
20. Clinicaltrials.gov. Safety/Immunogenicity/Genetic Drift of MP-12 Rift Valley Fever Vaccine (MP-12) [Internet]. 2016. Available from: <https://clinicaltrials.gov/ct2/show/study/NCT00415051>. [Accessed 26th January 2018]
21. Gowen BB, Bailey KW, Scharton D, Vest Z, Westover JB, Skirpstunas R, et al. Post-exposure vaccination with MP-12 lacking NSs protects mice against lethal Rift Valley fever virus challenge. *Antiviral Res*. 2013;98(2):135–43.
22. Ikegami T. Rift Valley fever vaccines: an overview of the safety and efficacy of the live-attenuated MP-12 vaccine candidate. *Expert Rev Vaccines*. 2017;16(6):601–11.
23. Ikegami T, Hill TE, Smith JK, et al. Rift Valley Fever Virus MP-12 Vaccine Is Fully Attenuated by a Combination of Partial Attenuations in the S, M, and L Segments. *Journal of virology*. 2015. p. 7262–76.
24. Indran SV, Lihoradova OA, Phoenix I, et al. Rift Valley fever virus MP-12 vaccine encoding Toscana virus NSs retains neuroinvasiveness in mice. *J Gen Virol*. 2013;94(Pt 7):1441–50.
25. Pittman PR, McClain D, Quinn X, et al. Safety and immunogenicity of a mutagenized, live attenuated Rift Valley fever vaccine, MP-12, in a Phase 1 dose escalation and route comparison study in humans. *Vaccine*. 2016;34(4):424–9.
26. Pittman PR, Norris SL, Brown ES, et al. Rift Valley fever MP-12 vaccine Phase 2 clinical trial: Safety, immunogenicity, and genetic characterization of virus isolates. *Vaccine*. 2016;34(4):523–30.
27. Rissmann M, Ulrich R, Schroder C, et al. Vaccination of alpacas against Rift Valley fever virus: Safety, immunogenicity and pathogenicity of MP-12 vaccine. *Vaccine*. 2017;35(4):655–62.

28. Dulal P, Wright D, Ashfield R, Hill AV, Charleston B, Warimwe GM. Potency of a thermostabilised chimpanzee adenovirus Rift Valley Fever vaccine in cattle. *Vaccine*. 2016;34(20):2296–8.
29. Warimwe GM, Gesharisha J, Carr BV, et al. Chimpanzee Adenovirus Vaccine Provides Multispecies Protection against Rift Valley Fever. *Sci Rep*. 2016. p. 20617.
30. Warimwe GM, Lorenzo G, Lopez-Gil E, et al. Immunogenicity and efficacy of a chimpanzee adenovirus-vectored Rift Valley fever vaccine in mice. *Viol J*. 2013. p. 349.
31. Subbarao K. Preclinical Studies of Bunyaviruses. 2016. Available from: [https://projectreporter.nih.gov/project\\_info\\_description.cfm?aid=9161568](https://projectreporter.nih.gov/project_info_description.cfm?aid=9161568). [Accessed 26th January 2018]
32. Busquets N, Lorenzo G, Lopez-Gil E, et al. Efficacy assessment of an MVA vectored Rift Valley Fever vaccine in lambs. *Antiviral Res*. 2014;108:165–72.
33. López-Gil E, Lorenzo G, Hevia E, et al. A Single Immunization with MVA Expressing GnGc Glycoproteins Promotes Epitope-specific CD8+ T Cell Activation and Protects Immune-competent Mice against a Lethal RVFV Infection. *PLoS Neglected Tropical Diseases*. 2013;7(7):e2309.
34. Kortekaas J, Oreshkova N, Cobos-Jimenez V, Vloet RP, Potgieter CA, Moormann RJ. Creation of a nonspreading Rift Valley fever virus. *Journal of virology*. 2011;85(23):12622–30.
35. Wichgers Schreur PJ, Oreshkova N, Moormann RJ, Kortekaas J. Creation of Rift Valley fever viruses with four-segmented genomes reveals flexibility in bunyavirus genome packaging. *Journal of virology*. 2014. p. 10883–93.
36. Wichgers Schreur PJ, van Keulen L, Kant J, Kortekaas J. Four-segmented Rift Valley fever virus-based vaccines can be applied safely in ewes during pregnancy. *Vaccine*. 2017;35(23):3123–8.
37. Oreshkova N, Wichgers Schreur PJ, Spel L, et al. Nonspreading Rift Valley Fever Virus Infection of Human Dendritic Cells Results in Downregulation of CD83 and Full Maturation of Bystander Cells. *PLoS One*. 2015;10(11):e0142670.
38. Oreshkova N, van Keulen L, Kant J, Moormann RJ, Kortekaas J. A single vaccination with an improved nonspreading Rift Valley fever virus vaccine provides sterile immunity in lambs. *PLoS One*. 2013;8(10):e77461.
39. Dodd KA, Bird BH, Metcalfe MG, Nichol ST, Albarino CG. Single-dose immunization with virus replicon particles confers rapid robust protection against Rift Valley fever virus challenge. *Journal of virology*. 2012;86(8):4204–12.
40. Jansen van Vuren P, Tiemessen CT, Paweska JT. Anti-nucleocapsid protein immune responses counteract pathogenic effects of Rift Valley fever virus infection in mice. *PLoS One*. 2011;6(9):e25027.
41. Boshra H, Lorenzo G, Rodriguez F, Brun A. A DNA vaccine encoding ubiquitinated Rift Valley fever virus nucleoprotein provides consistent immunity and protects IFNAR(-/-) mice upon lethal virus challenge. *Vaccine*. 2011;29(27):4469–75.
42. Bird BH, Albariño CG, Hartman AL, Erickson BR, Ksiazek TG, Nichol ST. Rift valley fever virus lacking the NSs and NSm genes is highly attenuated, confers protective immunity from virulent virus challenge, and allows for differential identification of infected and vaccinated animals. *Journal of virology*. 2008;82(6):2681–91.
43. Bird BH, Maartens LH, Campbell S, et al. Rift Valley Fever Virus Vaccine Lacking the NSs and NSm Genes Is Safe, Nonteratogenic, and Confers Protection from Viremia, Pyrexia, and Abortion following Challenge in Adult and Pregnant Sheep. *Journal of virology*. 2011;85(24):12901–9.
44. Pichlmair A, Habjan M, Unger H, Weber F. Virus-like particles expressing the nucleocapsid gene as an efficient vaccine against Rift Valley fever virus. *Vector borne and zoonotic diseases (Larchmont, NY)*. 2010;10(7):701–3.
45. Koukuntla R, Mandell RB, Flick R. Virus-like particle-based countermeasures against Rift Valley fever virus. *Zoonoses Public Health*. 2012;59 Suppl 2:142–50.
46. Mandell RB, Koukuntla R, Mogler LJ, et al. A replication-incompetent Rift Valley fever vaccine: chimeric virus-like particles protect mice and rats against lethal challenge. *Virology*. 2010;397(1):187–98.
47. Mandell RB, Koukuntla R, Mogler LJ, et al. Novel suspension cell-based vaccine production systems for Rift Valley fever virus-like particles. *J Virol Methods*. 2010;169(2):259–68.
48. Kalbina I, Lagerqvist N, Moiane B, et al. Arabidopsis thaliana plants expressing Rift Valley fever virus antigens: Mice exhibit systemic immune responses as the result of oral administration of the transgenic plants. *Protein Expression and Purification*. 2016;127:61–7.
49. Lorenzo G, Martin-Folgar R, Hevia E, Boshra H, Brun A. Protection against lethal Rift Valley fever virus (RVFV) infection in transgenic IFNAR(-/-) mice induced by different DNA vaccination regimens. *Vaccine*. 2010;28(17):2937–44.
50. Kortekaas J, de Boer SM, Kant J, Vloet RP, Antonis AF, Moormann RJ. Rift Valley fever virus immunity provided by a paramyxovirus vaccine vector. *Vaccine*. 2010;28(27):4394–401.
51. Wichgers Schreur PJ, Oreshkova N, Harders F, Bossers A, Moormann RJ, Kortekaas J. Paramyxovirus-based production of Rift Valley fever virus replicon particles. *J Gen Virol*. 2014;95(Pt 12):2638–48.
52. de Boer SM, Kortekaas J, Antonis AF, et al. Rift Valley fever virus subunit vaccines confer complete protection against a lethal virus challenge. *Vaccine*. 2010;28(11):2330–9.
53. Bhardwaj N, Heise MT, Ross TM. Vaccination with DNA plasmids expressing Gn coupled to C3d or alphavirus replicons expressing gn protects mice against Rift Valley fever virus. *PLoS Negl Trop Dis*. 2010;4(6):e725.
54. Näslund J, Lagerqvist N, Habjan M, et al. Vaccination with virus-like particles protects mice from lethal infection of Rift Valley Fever Virus. *Virology*. 2009;385(2):409–15.

55. Heise MT, Whitmore A, Thompson J, et al. An alphavirus replicon-derived candidate vaccine against Rift Valley fever virus. *Epidemiol Infect.* 2009;137(9):1309–18.
56. Gorchakov R, Volkova E, Yun N, et al. Comparative analysis of the alphavirus-based vectors expressing Rift Valley fever virus glycoproteins. *Virology.* 2007;366(1):212–25.
57. Murakami S, Terasaki K, Ramirez SI, Morrill JC, Makino S. Development of a novel, single-cycle replicable rift valley Fever vaccine. *PLoS Negl Trop Dis.* 2014;8(3):e2746.
58. Wang QH, Wang XJ, Hu S, Ge JY, Bu ZG. Study on DNA immune of envelope protein gene of Rift Valley Fever Virus. *Wei Sheng Wu Xue Bao.* 2007;47(4):677–81.
59. Papin JF, Verardi PH, Jones LA, et al. Recombinant Rift Valley fever vaccines induce protective levels of antibody in baboons and resistance to lethal challenge in mice. *Proc Natl Acad Sci USA.* 2011;108(36):14926–31.
60. The Jarvis Lab. 2018. Available from: <http://www.thejarvislab.com/>. [Accessed 26th January 2018]

**Appendix Table 2.9: SARS vaccine R&D pipeline, preclinical**

| Disease | Vaccine candidate                                                     | R&D phase   | Development Partners                                                                                                                                                                                                       |
|---------|-----------------------------------------------------------------------|-------------|----------------------------------------------------------------------------------------------------------------------------------------------------------------------------------------------------------------------------|
| SARS    | receptor binding domain (RBD) of the SARS- CoV spike (S) protein      | Preclinical | Baylor College Medicine; BCM-Sabin; New York Blood Center (NYBC); University of Texas Medical Branch (UTMB); Walter Reed Army Institute of Research (WRAIR); National Institute of Allergy and Infectious Diseases (NIAID) |
| SARS    | rSARSCoV-E*                                                           | Preclinical | CNB-CSIC; University of Iowa                                                                                                                                                                                               |
| SARS    | SARS VLPs S protein and influenza M1 protein                          | Preclinical | Novavax                                                                                                                                                                                                                    |
| SARS    | ChAdOX1 SARS                                                          | Preclinical | University of Oxford                                                                                                                                                                                                       |
| SARS    | MV-SARS recombinant measles virus vaccine expressing SARS CoV antigen | Preclinical | Institut Pasteur                                                                                                                                                                                                           |
| SARS    | SARS recombinant spike protein                                        | Preclinical | Vaxine Pty Ltd, Australia                                                                                                                                                                                                  |

**References related to the SARS vaccine R&D pipeline:**

1. DeDiego ML, Alvarez E, Almazan F, et al. A severe acute respiratory syndrome coronavirus that lacks the E gene is attenuated in vitro and in vivo. *Journal of virology*. 2007;81(4):1701–13.
2. Enjuanes L, Dediego ML, Alvarez E, Deming D, Sheahan T, Baric R. Vaccines to prevent severe acute respiratory syndrome coronavirus-induced disease. *Virus research*. 2008;133(1):45–62.
3. Anderson LJ, Tong S. Update on SARS research and other possibly zoonotic coronaviruses. *Int J Antimicrob Agents*. 2010;36 Suppl 1:S21–5.
4. Baric RS, Sheahan T, Deming D, et al. SARS coronavirus vaccine development. *Adv Exp Med Biol*. 2006;581:553–60.
5. Hilgenfeld R, Peiris M. From SARS to MERS: 10 years of research on highly pathogenic human coronaviruses. *Antiviral Res*. 2013;100(1):286–95.
6. Roberts A, Lamirande EW, Vogel L, Jackson JP, Paddock CD, Guarner J, et al. Animal models and vaccines for SARS-CoV infection. *Virus research*. 2008;133(1):20–32.
7. Roper RL, Rehm KE. SARS vaccines: where are we? *Expert Rev Vaccines*. 2009;8(7):887–98.
8. Woodland DL. Progress towards a SARS vaccine. *Viral immunology*. 2010;23(5):455.
9. Du L, He Y, Jiang S, Zheng BJ. Development of subunit vaccines against severe acute respiratory syndrome. *Drugs Today (Barc)*. 2008;44(1):63–73.
10. Du L, Zhao G, Chan CC, et al. A 219-mer CHO-expressing receptor-binding domain of SARS-CoV S protein induces potent immune responses and protective immunity. *Viral immunology*. 2010;23(2):211–9.
11. Du L, Zhao G, Chan CCS, et al. Recombinant receptor-binding domain of SARS-CoV spike protein expressed in mammalian, insect and E. coli cells elicits potent neutralizing antibody and protective immunity. *Virology*. 2009;393(1):144–50.
12. Du L, Zhao G, He Y, et al. Receptor-binding domain of SARS-CoV spike protein induces long-term protective immunity in an animal model. *Vaccine*. 2007;25(15):2832–8.
13. Du L, Zhao G, Li L, et al. Antigenicity and immunogenicity of SARS-CoV S protein receptor-binding domain stably expressed in CHO cells. *Biochem Biophys Res Commun*. 2009;384(4):486–90.
14. Du L, Zhao G, Lin Y, et al. Priming with rAAV encoding RBD of SARS-CoV S protein and boosting with RBD-specific peptides for T cell epitopes elevated humoral and cellular immune responses against SARS-CoV infection. *Vaccine*. 2008;26(13):1644–51.
15. Du L, Zhao G, Lin Y, et al. Intranasal vaccination of recombinant adeno-associated virus encoding receptor-binding domain of severe acute respiratory syndrome coronavirus (SARS-CoV) spike protein induces strong mucosal immune responses and provides long-term protection against SARS-CoV infection. *J Immunol*. 2008;180(2):948–56.
16. Hotez PJ. RBD recombinant protein-based SARS vaccine for biodefense. Baylor College of Medicine; NIAID; 2016. Available from: [https://projectreporter.nih.gov/project\\_info\\_description.cfm?aid=9056977&icde=0](https://projectreporter.nih.gov/project_info_description.cfm?aid=9056977&icde=0). [Accessed 26th January 2018]
17. Jiang S, Bottazzi ME, Du L, et al. Roadmap to developing a recombinant coronavirus S protein receptor-binding domain vaccine for severe acute respiratory syndrome. *Expert Rev Vaccines*. 2012;11(12):1405–13.
18. Tang X-C, Agnihothram SS, Jiao Y, et al. Identification of human neutralizing antibodies against MERS-CoV and their role in virus adaptive evolution. *Proceedings of the National Academy of Sciences*. 2014;111(19):E2018–E26.
19. Wang J, Tricoche N, Du L, et al. The adjuvanticity of an O. volvulus-derived rOv-ASP-1 protein in mice using sequential vaccinations and in non-human primates. *PLoS One*. 2012;7(5):e37019.

20. Zhang N, Channappanavar R, Ma C, et al. Identification of an ideal adjuvant for receptor-binding domain-based subunit vaccines against Middle East respiratory syndrome coronavirus. *Cellular & molecular immunology*. 2016;13(2):180–90.
21. Ma C, Wang L, Tao X, et al. Searching for an ideal vaccine candidate among different MERS coronavirus receptor-binding fragments—The importance of immunofocusing in subunit vaccine design. *Vaccine*. 2014;32(46):6170–6.
22. Enjuanes L, Zuniga S, Castano-Rodriguez C, Gutierrez-Alvarez J, Canton J, Sola I. Molecular Basis of Coronavirus Virulence and Vaccine Development. *Adv Virus Res*. 2016;96:245–86.
23. Enjuanes L. A novel strategy for developing a Sars-cov vaccine. University of Iowa; NIH/NIAID; 2015. Available from: [https://projectreporter.nih.gov/project\\_info\\_description.cfm?aid=8881050&icde=0](https://projectreporter.nih.gov/project_info_description.cfm?aid=8881050&icde=0). [Accessed 26th January 2018]
24. Fett C, DeDiego ML, Regla-Nava JA, Enjuanes L, Perlman S. Complete protection against severe acute respiratory syndrome coronavirus-mediated lethal respiratory disease in aged mice by immunization with a mouse-adapted virus lacking E protein. *Journal of virology*. 2013;87(12):6551–9.
25. Lamirande EW, DeDiego ML, Roberts A, et al. A live attenuated severe acute respiratory syndrome coronavirus is immunogenic and efficacious in golden Syrian hamsters. *Journal of virology*. 2008;82(15):7721–4.
26. Netland J, DeDiego ML, Zhao J, et al. Immunization with an attenuated severe acute respiratory syndrome coronavirus deleted in E protein protects against lethal respiratory disease. *Virology*. 2010;399(1):120–8.
27. Perlman S. PPG: Sars-Cov-Host cell interactions and vaccine development. 2015. Available from: [https://projectreporter.nih.gov/project\\_info\\_description.cfm?aid=8881046&icde=0](https://projectreporter.nih.gov/project_info_description.cfm?aid=8881046&icde=0). [Accessed 26th January 2018]
28. Regla-Nava JA, Nieto-Torres JL, Jimenez-Guardeno JM, et al. Severe acute respiratory syndrome coronaviruses with mutations in the E protein are attenuated and promising vaccine candidates. *Journal of virology*. 2015;89(7):3870–87.
29. Liu YV, Massare MJ, Barnard DL, et al. Chimeric severe acute respiratory syndrome coronavirus (SARS-CoV) S glycoprotein and influenza matrix 1 efficiently form virus-like particles (VLPs) that protect mice against challenge with SARS-CoV. *Vaccine*. 2011;29(38):6606–13.
30. Callendret B, Lorin V, Charneau P, et al. Heterologous viral RNA export elements improve expression of severe acute respiratory syndrome (SARS) coronavirus spike protein and protective efficacy of DNA vaccines against SARS. *Virology*. 2007;363(2):288–302.
31. Escriou N, Callendret B, Lorin V, et al. Protection from SARS coronavirus conferred by live measles vaccine expressing the spike glycoprotein. *Virology*. 2014;452–453:32–41.
32. Graham RL, Becker MM, Eckerle LD, Bolles M, Denison MR, Baric RS. A live, impaired-fidelity coronavirus vaccine protects in an aged, immunocompromised mouse model of lethal disease. *Nature medicine*. 2012;18(12):1820–6.
33. Honda-Okubo Y, Barnard D, Ong CH, Peng BH, Tseng CT, Petrovsky N. Severe acute respiratory syndrome-associated coronavirus vaccines formulated with delta inulin adjuvants provide enhanced protection while ameliorating lung eosinophilic immunopathology. *Journal of virology*. 2015;89(6):2995–3007.
34. McPherson C, Chubet R, Holtz K, et al. Development of a SARS Coronavirus Vaccine from Recombinant Spike Protein Plus Delta Inulin Adjuvant. *Methods Mol Biol*. 2016;1403:269–84.
35. Roberts A, Lamirande EW, Vogel L, et al. Immunogenicity and protective efficacy in mice and hamsters of a beta-propiolactone inactivated whole virus SARS-CoV vaccine. *Viral immunology*. 2010;23(5):509–19.
36. Clinicaltrials.gov. Phase I Study of a Vaccine for Severe Acute Respiratory Syndrome (SARS) [Internet]. 2004. Available from: [https://clinicaltrials.gov/ct2/show/NCT00099463?cond=SARS&intr=vaccine&rank=3&sel\\_rss=mod14&submit\\_fld\\_opt=](https://clinicaltrials.gov/ct2/show/NCT00099463?cond=SARS&intr=vaccine&rank=3&sel_rss=mod14&submit_fld_opt=). [Accessed 26th January 2018]
37. Martin JE, Louder MK, Holman LA, et al. A SARS DNA vaccine induces neutralizing antibody and cellular immune responses in healthy adults in a Phase I clinical trial. *Vaccine*. 2008;26(50):6338–43.
38. Menachery VD, Yount BL, Jr., Josset L, et al. Attenuation and restoration of severe acute respiratory syndrome coronavirus mutant lacking 2'-O-methyltransferase activity. *Journal of virology*. 2014;88(8):4251–64.
39. Mu F, Niu D, Mu J, et al. The expression and antigenicity of a truncated spike-nucleocapsid fusion protein of severe acute respiratory syndrome-associated coronavirus. *BMC Microbiol*. 2008;8:207.
40. Ohno S, Kohyama S, Taneichi M, et al. Synthetic peptides coupled to the surface of liposomes effectively induce SARS coronavirus-specific cytotoxic T lymphocytes and viral clearance in HLA-A\*0201 transgenic mice. *Vaccine*. 2009;27(29):3912–20.
41. Sheahan T, Whitmore A, Long K, et al. Successful vaccination strategies that protect aged mice from lethal challenge from influenza virus and heterologous severe acute respiratory syndrome coronavirus. *Journal of virology*. 2011;85(1):217–30.
42. Shim BS, Stadler K, Nguyen HH, et al. Sublingual immunization with recombinant adenovirus encoding SARS-CoV spike protein induces systemic and mucosal immunity without redirection of the virus to the brain. *Viol J*. 2012;9:215.



43. Spruth M, Kistner O, Savidis-Dacho H, et al. A double-inactivated whole virus candidate SARS coronavirus vaccine stimulates neutralising and protective antibody responses. *Vaccine*. 2006;24(5):652–61.
44. Wang X, Xu W, Tong D, et al. A chimeric multi-epitope DNA vaccine elicited specific antibody response against severe acute respiratory syndrome-associated coronavirus which attenuated the virulence of SARS-CoV in vitro. *Immunol Lett*. 2008;119(1–2):71–7.
45. Li J, Ulitzky L, Silberstein E, Taylor DR, Viscidi R. Immunogenicity and protection efficacy of monomeric and trimeric recombinant SARS coronavirus spike protein subunit vaccine candidates. *Viral immunology*. 2013;26(2):126–32.
46. Huang J, Cao Y, Du J, Bu X, Ma R, Wu C. Priming with SARS CoV S DNA and boosting with SARS CoV S epitopes specific for CD4+ and CD8+ T cells promote cellular immune responses. *Vaccine*. 2007;25(39–40):6981–91.
47. Huang J, Ma R, Wu CY. Immunization with SARS-CoV S DNA vaccine generates memory CD4+ and CD8+ T cell immune responses. *Vaccine*. 2006;24(23):4905–13.
48. Zhao K, Yang B, Xu Y, Wu C. CD8+ T cell response in HLA-A\*0201 transgenic mice is elicited by epitopes from SARS-CoV S protein. *Vaccine*. 2010;28(41):6666–74.
49. Lin JT, Zhang JS, Su N, et al. Safety and immunogenicity from a phase I trial of inactivated severe acute respiratory syndrome coronavirus vaccine. *Antivir Ther*. 2007;12(7):1107–13.
50. Qin E, Shi H, Tang L, et al. Immunogenicity and protective efficacy in monkeys of purified inactivated Vero-cell SARS vaccine. *Vaccine*. 2006;24(7):1028–34.
51. Lu B, Tao L, Wang T, et al. Humoral and cellular immune responses induced by 3a DNA vaccines against severe acute respiratory syndrome (SARS) or SARS-like coronavirus in mice. *Clinical and vaccine immunology CVI*. 2009;16(1):73–7.
52. Okada M, Okuno Y, Hashimoto S, et al. Development of vaccines and passive immunotherapy against SARS corona virus using SCID-PBL/hu mouse models. *Vaccine*. 2007;25(16):3038–40.
53. Schulze K, Staib C, Schatzl HM, Ebensen T, Erfle V, Guzman CA. A prime-boost vaccination protocol optimizes immune responses against the nucleocapsid protein of the SARS coronavirus. *Vaccine*. 2008;26(51):6678–84.
54. Liniger M, Zuniga A, Tamin A, et al. Induction of neutralising antibodies and cellular immune responses against SARS coronavirus by recombinant measles viruses. *Vaccine*. 2008;26(17):2164–74.
55. Hu H, Lu X, Tao L, et al. Induction of specific immune responses by severe acute respiratory syndrome coronavirus spike DNA vaccine with or without interleukin-2 immunization using different vaccination routes in mice. *Clinical and vaccine immunology: CVI*. 2007;14(7):894–901.
56. Zhao B, Jin NY, Wang RL, Zhang LS, Zhang YJ. Immunization of mice with a DNA vaccine based on severe acute respiratory syndrome coronavirus spike protein fragment 1. *Viral immunology*. 2006;19(3):518–24.
57. Kobinger GP, Figueredo JM, Rowe T, et al. Adenovirus-based vaccine prevents pneumonia in ferrets challenged with the SARS coronavirus and stimulates robust immune responses in macaques. *Vaccine*. 2007;25(28):5220–31.
58. Yan K, Tan W, Wang H, et al. SARS-CoV spike proteins expressed by the vaccinia virus Tiantan strain: secreted sq protein induces robust neutralization antibody in mice. *Viral immunology*. 2009;22(1):57–66.
59. Kam YW, Kien F, Roberts A, Cheung YC, Lamirande EW, Vogel L, et al. Antibodies against trimeric S glycoprotein protect hamsters against SARS-CoV challenge despite their capacity to mediate FcγRII-dependent entry into B cells in vitro. *Vaccine*. 2007;25(4):729–40.
60. Lokugamage KG, Yoshikawa-Iwata N, Ito N, et al. Chimeric coronavirus-like particles carrying severe acute respiratory syndrome coronavirus (SCoV) S protein protect mice against challenge with SCoV. *Vaccine*. 2008;26(6):797–808.
61. Ishii K, Hasegawa H, Nagata N, et al. Induction of protective immunity against severe acute respiratory syndrome coronavirus (SARS-CoV) infection using highly attenuated recombinant vaccinia virus DIs. *Virology*. 2006;351(2):368–80.
62. ProteinSciences. Vaccines 2017 [Available from: <http://www.proteinsciences.com/VAC.htm#VAC4>. [Accessed 26th January 2018]
63. Ba L, Yi CE, Zhang L, Ho DD, Chen Z. Heterologous MVA-S prime Ad5-S boost regimen induces high and persistent levels of neutralizing antibody response against SARS coronavirus. *Appl Microbiol Biotechnol*. 2007;76(5):1131–6.
64. Du L, He Y, Zhou Y, Liu S, Zheng B, Jiang S. Development of Vaccines and therapeutics targeting the spike protein of SARS-CoV (review). *Nature Rev. Microbiol*. 2009; 7(3): 226–236.

**Appendix Table 2.10: SFTS vaccine R&D pipeline, preclinical**

| <b>Disease</b> | <b>Vaccine candidate</b> | <b>R&amp;D phase</b> | <b>Development Partners</b>                                                                                                        |
|----------------|--------------------------|----------------------|------------------------------------------------------------------------------------------------------------------------------------|
| SFTS           | DNA Vaccine              | Preclinical          | GeneOne Life Science; Graduate school of Medical Science and Engineering, KAIST; College of Medicine, Chungbuk National University |

**References related to the SFTS vaccine R&D pipeline:**

1. GeneOne Life Sciences. Pipeline. 2017. Available from: <http://www.genels.com/en/sub0301.php>. [Accessed 26th January 2018]

**Appendix Table 2.11: Zika vaccine R&D pipeline, preclinical through phase II**

| <b>Disease</b> | <b>Vaccine candidate</b>                                                                                      | <b>R&amp;D phase</b> | <b>Development Partners</b>                                                                                                                                                                     |
|----------------|---------------------------------------------------------------------------------------------------------------|----------------------|-------------------------------------------------------------------------------------------------------------------------------------------------------------------------------------------------|
| Zika           | VRC-ZKADNA090-00-VP                                                                                           | Phase II             | Paxvax; National Institute of Allergy and Infectious Diseases (NIAID)                                                                                                                           |
| Zika           | GLS-5700 is a DNA plasmid encoding for pre-membrane and envelope (prME) proteins of the Zika virus            | Phase I              | Inovio Pharmaceuticals; GeneOne Life Science, Inc.                                                                                                                                              |
| Zika           | AGS-v                                                                                                         | Phase I              | SEEK; National Institute of Allergy and Infectious Diseases (NIAID); Imutex; Innovate UK and the UK Department of Health and Social Care                                                        |
| Zika           | mRNA-1325                                                                                                     | Phase I              | Moderna Therapeutics                                                                                                                                                                            |
| Zika           | MV-Zika based on measles vector platform                                                                      | Phase I              | Themis Bioscience GmbH; Institut Pasteur                                                                                                                                                        |
| Zika           | VRC ZIKV DNA                                                                                                  | Phase I              | National Institute of Allergy and Infectious Diseases (NIAID)                                                                                                                                   |
| Zika           | ZIKV PIV                                                                                                      | Phase I              | Walter Reed Army Institute of Research (WRAIR); Beth Israel Deaconess Medical Center (BIDMC); Harvard University; National Institute of Allergy and Infectious Diseases (NIAID); Sanofi Pasteur |
| Zika           | BBV121 (Inactivated whole virion ZIKV vaccine)                                                                | Phase I              | Bharat Biotech International                                                                                                                                                                    |
| Zika           | UOL- Zika vaccine                                                                                             | Phase I              | University of Liverpool; Department of Health - UK                                                                                                                                              |
| Zika           | GEO-ZM02                                                                                                      | Preclinical          | GeoVax; University of Georgia; Center for Disease Control and Prevention (CDC)                                                                                                                  |
| Zika           | NILV-ZIK                                                                                                      | Preclinical          | Institut Pasteur                                                                                                                                                                                |
| Zika           | ChAdOx1 Zika                                                                                                  | Preclinical          | University of Oxford                                                                                                                                                                            |
| Zika           | Undisclosed                                                                                                   | Preclinical          | Undisclosed                                                                                                                                                                                     |
| Zika           | SCV-CHIKV+ZIKV+YF, SCV viral vectored vaccine                                                                 | Preclinical          | Sementis Ltd                                                                                                                                                                                    |
| Zika           | SCV-CHIKV+ZIKV (SCV1002), SCV viral vectored vaccine                                                          | Preclinical          | Sementis Ltd                                                                                                                                                                                    |
| Zika           | SCV-ZIKV (SCV1003), SCV viral vectored vaccine                                                                | Preclinical          | Sementis Ltd                                                                                                                                                                                    |
| Zika           | Inactivated whole target organism                                                                             | Preclinical          | Takeda Pharmaceuticals, Vaccines Business Unit                                                                                                                                                  |
| Zika           | VLA1601 (Inactivated whole target organism)                                                                   | Preclinical          | Emergent BioSolutions; Valneva SE                                                                                                                                                               |
| Zika           | Paxvax VLP                                                                                                    | Preclinical          | Paxvax; Center for Disease Control and Prevention (CDC)                                                                                                                                         |
| Zika           | Single cell infectious ZIKV (SCfZIKV) Live attenuated vaccine                                                 | Preclinical          | University of Rochester; Centro Nacional de Biotecnología, Spain                                                                                                                                |
| Zika           | mRNA-1706                                                                                                     | Preclinical          | Moderna Therapeutics                                                                                                                                                                            |
| Zika           | Undisclosed                                                                                                   | Preclinical          | Undisclosed                                                                                                                                                                                     |
| Zika           | PODS Zika 1                                                                                                   | Preclinical          | Cell Guidance Systems; University of Cambridge; Imperial College London; Department of Health - UK                                                                                              |
| Zika           | Undisclosed                                                                                                   | Preclinical          | Undisclosed                                                                                                                                                                                     |
| Zika           | Undisclosed                                                                                                   | Preclinical          | Undisclosed                                                                                                                                                                                     |
| Zika           | Undisclosed                                                                                                   | Preclinical          | Undisclosed                                                                                                                                                                                     |
| Zika           | Undisclosed                                                                                                   | Preclinical          | Undisclosed                                                                                                                                                                                     |
| Zika           | ZIKV iDNA, a DNA vaccine encoding genetically stable, live-attenuated chimeric flavivirus encoding ZIKV genes | Preclinical          | Medigen, Inc.                                                                                                                                                                                   |
| Zika           | Inactivated ZIKV                                                                                              | Preclinical          | Najit Technologies, Inc; National Institute of Allergy and Infectious Diseases (NIAID)                                                                                                          |
| Zika           | rISFVN4CTA25-ZIKV (VesiculoVax™ Isfahan Virus Vector)                                                         | Preclinical          | Profectus Biosciences; Yale University; University of Texas Medical Branch (UTMB)                                                                                                               |
| Zika           | ZIKA DIII                                                                                                     | Preclinical          | Singapore Immunology Network                                                                                                                                                                    |
| Zika           | Adeno virus based                                                                                             | Preclinical          | CanSino Biologics Inc.                                                                                                                                                                          |
| Zika           | Zika PrME vaccine                                                                                             | Preclinical          | Vaxine Pty Ltd, Australia ; Protein Sciences                                                                                                                                                    |
| Zika           | Codon deoptimization for the development of ZIKV live attenuated vaccines                                     | Preclinical          | University of Rochester                                                                                                                                                                         |
| Zika           | Undisclosed                                                                                                   | Preclinical          | Undisclosed                                                                                                                                                                                     |
| Zika           | DNA pWRG/ZIKA-JE-prME(opt)                                                                                    | Preclinical          | United States Army Medical Research Institute of Infectious Diseases (USAMRIID); PharmaJet                                                                                                      |
| Zika           | Subunit vaccine based on critical neutralizing fragment in ZIKV EDIII                                         | Preclinical          | New York Blood Center                                                                                                                                                                           |

## References related to the Zika vaccine R&D pipeline:

1. Barker S. Phase Ib trial of a simple, multivalent vaccine to prevent Zika and Chikungunya. The Jenner Institute, University of Oxford, Oxford. 2018. Available from: <http://gtr.rcuk.ac.uk/projects?ref=971557>. [Accessed 26th January 2018]
2. Korean CDC. Zika: Public Health Weekly Report. 2017. Available from: <http://www.cdc.go.kr/CDC/cms/cmsFileDownload.jsp?fid=496&cid=75448&fieldName=attach1&index=1>. [Accessed 26th January 2018]
3. Clinicaltrials.gov. Study of GLS-5700 in Healthy Volunteers [Internet]. 2016. Available from: <https://clinicaltrials.gov/ct2/show/NCT02809443>. [Accessed 26th January 2018]
4. Clinicaltrials.gov. Study of GLS-5700 in Dengue Virus Seropositive Adults [Internet]. 2016. Available from: <https://clinicaltrials.gov/ct2/show/study/NCT02887482>. [Accessed 26th January 2018]
5. Inovio. Inovio Pharmaceutical's DNA Vaccine for Zika Virus Induces Robust Immune Responses in Preclinical Study [press release]. 2016. Available from: <http://ir.inovio.com/news/news-releases/news-releases-details/2016/Inovio-Pharmaceuticals-DNA-Vaccine-for-Zika-Virus-Induces-Robust-Immune-Responses-in-Preclinical-Study/default.aspx>. [Accessed 31th March 2017]
6. Clinicaltrials.gov. Study in Healthy Volunteers to Evaluate the Safety and Immunogenicity of AGS-v, a Universal Mosquito-Borne Disease Vaccine [Internet]. 2017 [cited 30042017]. Available from: <https://clinicaltrials.gov/ct2/show/study/NCT03055000>. [Accessed 26th January 2018]
7. Ribeiro JM. Role of saliva in blood-feeding by arthropods. *Annu Rev Entomol*. 1987.
8. NIH. NIH begins study of vaccine to protect against mosquito-borne diseases. Experimental vaccine targets mosquito saliva [press release]. 2017. Available from: <https://www.nih.gov/news-events/news-releases/nih-begins-study-vaccine-protect-against-mosquito-borne-diseases>. [Accessed 26th January 2018]
9. Peng Z, Yang M, Simons FER. Immunologic Mechanisms in Mosquito Allergy: Correlation of Skin Reactions with Specific IgE and IgG Antibodies and Lymphocyte Proliferation Response to Mosquito Antigens. *Annals of Allergy, Asthma & Immunology*. 1996;77(3):238–44.
10. S S, JP V. Delayed migration of Plasmodium sporozoites from the mosquito bite site to the blood. *Am J Trop Med Hyg*. 1997 Oct;57(4):426–9.
11. NIH. Phase 2 Zika Vaccine Trial Begins in U.S., Central and South America. Study Will Evaluate NIH's Experimental DNA Vaccine 2017 [updated 31032017]. Available from: <https://www.niaid.nih.gov/news-events/phase-2-zika-vaccine-trial-begins-us-central-and-south-america>. [Accessed 26th January 2018]
12. Clinicaltrials.gov. Safety, Tolerability, and Immunogenicity of mRNA-1325 in Healthy Adult Subjects [Internet]. 2017. Available from: <https://clinicaltrials.gov/ct2/show/NCT03014089>. [Accessed 26th January 2018]
13. Terry M. Why Secretive \$5 Billion Biotech Moderna May Not be Able to Commercialize Products into Clinical Trials. 2017. <http://www.biospace.com/News/why-secretive-5-billion-biotech-moderna-may-not-be/446627>. [Accessed 26th January 2018]
14. Moderna. Pipeline. 2017. Available from: <https://www.modernatx.com/pipeline>. [Accessed 26th January 2018]
15. Clinicaltrials.gov. VRC 319: A Phase I/Ib, Randomized Clinical Trial to Evaluate the Safety and Immunogenicity of A Zika Virus DNA Vaccine, VRC-ZKADNA085-00-VP, in Healthy Adults [Internet]. 2016. Available from: <https://clinicaltrials.gov/ct2/show/study/NCT02840487?view=record>. [Accessed 26th January 2018]
16. Clinicaltrials.gov. A Zika Virus DNA Vaccine in Healthy Adults and Adolescents (DNA) [Internet]. 2017. Available from: <https://clinicaltrials.gov/ct2/show/NCT03110770?term=vrc+5283&rank=1>. [Accessed 26th January 2018]
17. Fauci AS, Morens DM. Zika Virus in the Americas — Yet Another Arbovirus Threat. *New England Journal of Medicine*. 2016;374(7):601–4.
18. NIAID. Zika Virus vaccines. Available from: <https://www.niaid.nih.gov/diseases-conditions/zika-vaccines>. [Accessed 26th January 2018]
19. Waltz E. GM mosquitoes fire first salvo against Zika virus. *Nat Biotech*. 2016;34(3):221–2.
20. Clinicaltrials.gov. A Phase 1, First-in-human, Double-blinded, Randomized, Placebo-controlled Trial of a Zika Virus Purified Inactivated Vaccine (ZPIV) With Alum Adjuvant in Healthy Flavivirus-naive and Flavivirus-Primed Subjects. [Internet]. 2016. Available from: <https://clinicaltrials.gov/ct2/show/study/NCT02963909>. [Accessed 26th January 2018]
21. Clinicaltrials.gov. Zika Virus Purified Inactivated Vaccine (ZPIV) Accelerated Vaccination Schedule Study (Z001) [Internet]. 2016. Available from: <https://clinicaltrials.gov/ct2/show/study/NCT02937233?cond=Zika&intr=Vaccine&rank=1>. [Accessed 26th January 2018]

22. Clinicaltrials.gov. ZIKA Vaccine in Naive Subjects [Internet]. 2016. Available from: <https://clinicaltrials.gov/ct2/show/study/NCT02952833?cond=Zika&intr=Vaccine&rank=2>. [Accessed 26th January 2018]
23. Clinicaltrials.gov. Phase I, Randomized, Double-blinded, Placebo-Controlled Dose De-escalation Study to Evaluate Safety and Immunogenicity of Alum Adjuvanted Zika Virus Purified Inactivated Vaccine (ZPIV) in Adults in a Flavivirus Endemic Area [Internet]. 2016. Available from: [https://clinicaltrials.gov/ct2/show/NCT03008122?cond=Zika&intr=Vaccine&rank=3&submit\\_fld\\_opt=](https://clinicaltrials.gov/ct2/show/NCT03008122?cond=Zika&intr=Vaccine&rank=3&submit_fld_opt=). [Accessed 26th January 2018]
24. CTRI. A Phase 1 clinical trial to evaluate safety and effectiveness of ZIKA vaccine in healthy adults. [Internet]. Developer: Bharat Biotech. 2017. Available from: <http://www.ctri.nic.in/Clinicaltrials/showallp.php?mid1=16798&EncHid=&userName=Zika%20vaccine>. [Accessed 26th January 2018]
25. Sagonowsky E. India's Bharat Biotech poised to enter clinic with Zika vaccine, report says. FiercePharma. 2016. Available from: <http://www.fiercepharma.com/vaccines/bharat-biotech-poised-to-enter-clinic-zika-vaccine-report-says>. [Accessed 26th January 2018]
26. WHO Vaccine Pipeline Tracker. BBV121-Inactivated Whole Target Organism [Internet]. 2017 [cited 04/05/2017]. Available from: [https://docs.google.com/spreadsheets/d/19otvINcayJURCMg76xWO4KvuyedYbMZDcXqbyJGdcZM/pubhtml#](https://docs.google.com/spreadsheets/d/19otvINcayJURCMg76xWO4KvuyedYbMZDcXqbyJGdcZM/pubhtml#.). [Accessed 31th March 2017]
27. Sanofi Pasteur. Sanofi Pasteur, Fiocruz, and WRAIR Agree to Collaborate on Zika Vaccine Research. The three research organizations have a history of flavivirus vaccine collaboration [press release]. 2016. Available from: [http://www.sanofipasteur.com/en/articles/Sanofi\\_Pasteur\\_Fiocruz\\_and\\_WRAIR\\_Agree\\_to\\_Collaborate\\_on\\_Zika\\_Vaccine\\_Research.aspx](http://www.sanofipasteur.com/en/articles/Sanofi_Pasteur_Fiocruz_and_WRAIR_Agree_to_Collaborate_on_Zika_Vaccine_Research.aspx). [Accessed 31th March 2017]
28. WHO Vaccine Pipeline Tracker. ZIKV-Inactivated Whole Target Organism-Bio Manguinhos/Sanofi Pasteur/WRAIR [Internet]. 2017. Available from: [https://docs.google.com/spreadsheets/d/19otvINcayJURCMg76xWO4KvuyedYbMZDcXqbyJGdcZM/pubhtml#](https://docs.google.com/spreadsheets/d/19otvINcayJURCMg76xWO4KvuyedYbMZDcXqbyJGdcZM/pubhtml#.). [Accessed 31th March 2017]
29. WHO Vaccine Pipeline Tracker. ZIKV-Recombinant Subunit (non-VLP) - Bio-Manguinhos partnership [Internet]. 2017. Available from: [https://docs.google.com/spreadsheets/d/19otvINcayJURCMg76xWO4KvuyedYbMZDcXqbyJGdcZM/pubhtml#](https://docs.google.com/spreadsheets/d/19otvINcayJURCMg76xWO4KvuyedYbMZDcXqbyJGdcZM/pubhtml#.). [Accessed 31th March 2017]
30. WHO Vaccine Pipeline Tracker. ZIKV-Recombinant viral vector-Brazilian MoH agreement with UTMB and IEC/SVS/MS [Internet]. 2017. Available from: [https://docs.google.com/spreadsheets/d/19otvINcayJURCMg76xWO4KvuyedYbMZDcXqbyJGdcZM/pubhtml#](https://docs.google.com/spreadsheets/d/19otvINcayJURCMg76xWO4KvuyedYbMZDcXqbyJGdcZM/pubhtml#.). [Accessed 31th March 2017]
31. Shan C, Muruato AE, Jagger BW, et al. A single-dose live-attenuated vaccine prevents Zika virus pregnancy transmission and testis damage. *Nat Commun*. 2017;8(1):676.
32. WHO Vaccine Pipeline Tracker. ZIKV-Live Attenuated Recombinant Virus-Brazilian MoH agreement with UTMB and IEC/SVS/MS [Internet]. 2017. Available from: [https://docs.google.com/spreadsheets/d/19otvINcayJURCMg76xWO4KvuyedYbMZDcXqbyJGdcZM/pubhtml#](https://docs.google.com/spreadsheets/d/19otvINcayJURCMg76xWO4KvuyedYbMZDcXqbyJGdcZM/pubhtml#.). [Accessed 31th March 2017]
33. WHO Vaccine Pipeline Tracker. Butantan ZIKV-Inactivated Whole Target Organism [Internet]. 2017. Available from: [https://docs.google.com/spreadsheets/d/19otvINcayJURCMg76xWO4KvuyedYbMZDcXqbyJGdcZM/pubhtml#](https://docs.google.com/spreadsheets/d/19otvINcayJURCMg76xWO4KvuyedYbMZDcXqbyJGdcZM/pubhtml#.). [Accessed 31th March 2017]
34. WHO Vaccine Pipeline Tracker. Butantan attenuated ZIKV-Live, attenuated target organism [Internet]. 2017. Available from: [https://docs.google.com/spreadsheets/d/19otvINcayJURCMg76xWO4KvuyedYbMZDcXqbyJGdcZM/pubhtml#](https://docs.google.com/spreadsheets/d/19otvINcayJURCMg76xWO4KvuyedYbMZDcXqbyJGdcZM/pubhtml#.). [Accessed 31th March 2017]
35. Emergent BioSolutions. Emergent BioSolutions Receives BARDA Task Order Valued at Up to \$21.9 Million to Develop and Manufacture a Zika Vaccine [press release]. 2016. Available from: <http://investors.emergentbiosolutions.com/phoenix.zhtml?c=202582&p=irol-newsArticle&ID=2180167>. [Accessed 07th February 2018]
36. WHO Vaccine Pipeline Tracker. ZIKV-inactivated virus + aluminium adjuvant-Emergent BioSolutions [Internet]. 2017. Available from: [https://docs.google.com/spreadsheets/d/19otvINcayJURCMg76xWO4KvuyedYbMZDcXqbyJGdcZM/pubhtml#](https://docs.google.com/spreadsheets/d/19otvINcayJURCMg76xWO4KvuyedYbMZDcXqbyJGdcZM/pubhtml#.). [Accessed 31th March 2017]
37. GeoVax Reports Promising Results for Zika Vaccine [press release]. 2017. Available from: <https://www.geovax.com/news/entry/2017/03/20/geovax-reports-promising-results-for-zika-vaccine.html>. [Accessed 07th February 2018]

38. WHO Vaccine Pipeline Tracker. GEO-ZM05-Recombinant Viral Vector [Internet]. 2017. Available from: <https://docs.google.com/spreadsheets/d/19otvINcayJURCMg76xWO4KvuyedYbMZDcXqbyJGdcZM/pubhtml#> . [Accessed 31th March 2017]
39. WHO Vaccine Pipeline Tracker. WT-Self-Amplifying mRNA(SAM) [Internet]. 2017. Available from: <https://docs.google.com/spreadsheets/d/19otvINcayJURCMg76xWO4KvuyedYbMZDcXqbyJGdcZM/pubhtml#> . [Accessed 31th March 2017]
40. GlaxoSmithKline plc. Update on GSK's response to the Zika virus disease outbreak [press release]. 2016. Available from: <http://www.gsk.com/en-gb/media/resource-centre/zika/>. [Accessed 31th March 2017]
41. WHO Vaccine Pipeline Tracker. CO-SELF-amplifying mRNA (SAM)-prME [Internet]. 2017. Available from: <https://docs.google.com/spreadsheets/d/19otvINcayJURCMg76xWO4KvuyedYbMZDcXqbyJGdcZM/pubhtml#> . [Accessed 31th March 2017]
42. WHO Vaccine Pipeline Tracker. VRC\_5283-Self-amplifying mRNA(SAM)-GSK/NIH [Internet]. 2017. Available from: <https://docs.google.com/spreadsheets/d/19otvINcayJURCMg76xWO4KvuyedYbMZDcXqbyJGdcZM/pubhtml#> . [Accessed 31th March 2017]
43. Graham B. Rapid development of a vaccine for Zika virus. NIAID: NIAID; 2016. Available from: [https://projectreporter.nih.gov/project\\_info\\_description.cfm?aid=9360471&icde=34675971&ddparam=&ddvalu e=&ddsub=&cr=21&csb=default&cs=ASC&pball=](https://projectreporter.nih.gov/project_info_description.cfm?aid=9360471&icde=34675971&ddparam=&ddvalu e=&ddsub=&cr=21&csb=default&cs=ASC&pball=). [Accessed 07th February 2018]
44. WHO Vaccine Pipeline Tracker. VRC\_5288-Self-amplifying mRNA (SAM)-GSK/NIH [Internet]. 2017. Available from: <https://docs.google.com/spreadsheets/d/19otvINcayJURCMg76xWO4KvuyedYbMZDcXqbyJGdcZM/pubhtml#> . [Accessed 31th March 2017]
45. Grover N, Penumudi A. Hawaii Biotech joins race to develop Zika vaccine. In: Penumudi NGaA, editor. *Reuters*. 2016. Available from: <http://www.reuters.com/article/us-health-zika-idUSKCN0V71OV>. [Accessed 07th February 2018]
46. WHO Vaccine Pipeline Tracker. ZIK-80E-Recombinant subunit (non VLP)-Hawaii Biotech, Inc. [Internet]. 2017. Available from: <https://docs.google.com/spreadsheets/d/19otvINcayJURCMg76xWO4KvuyedYbMZDcXqbyJGdcZM/pubhtml#> . [Accessed 31th March 2017]
47. ZIKVLP-Recombinant subunit VLP (non-fusion)-Institut Oasteur Shanghai, China [Internet]. 2017. Available from: <https://docs.google.com/spreadsheets/d/19otvINcayJURCMg76xWO4KvuyedYbMZDcXqbyJGdcZM/pubhtml#> . [Accessed 31th March 2017]
48. ZIKAlliance. Successful technology transfer of a Zika vaccine developed by Institut Pasteur Shanghai-Chinese Academy of Sciences (IPS-CAS) to Chongqing Zhifei Biological Products Co., Ltd.: Research Capacity network; 2017.
49. Institut Pasteur, France. Zika. 2017. Available from: <https://www.pasteur.fr/en/medical-center/disease-sheets/zika>. [Accessed 07th February 2018]
50. WHO Vaccine Pipeline Tracker. NILV-ZIK-Recombinant Viral Vector-Institut Pasteur, Paris, France [Internet]. 2017. Available from: <https://docs.google.com/spreadsheets/d/19otvINcayJURCMg76xWO4KvuyedYbMZDcXqbyJGdcZM/pubhtml#> . [Accessed 31th March 2017]
51. The Jenner Institute. Zika Virus Vaccine Programme. 2017. Available from: <http://www.jenner.ac.uk/zika-virus-vaccine-programme>. [Accessed 07th February 2018]
52. Reyes-Sandoval A. Protective efficacy and neutralisation to select an optimal Zika virus vaccine. The Jenner Institute, University of Oxford, Oxford. 2018. Available from: <http://gtr.rcuk.ac.uk/projects?ref=972216>. [Accessed 07th February 2018]
53. WHO Vaccine Pipeline Tracker. ChAdOx1-Zk-Recombinant Viral Vector-Jenner Institute [Internet]. 2017. Available from: <https://docs.google.com/spreadsheets/d/19otvINcayJURCMg76xWO4KvuyedYbMZDcXqbyJGdcZM/pubhtml#> . [Accessed 31th March 2017]
54. WHO Vaccine Pipeline Tracker. ZIKV-Inactivated Whole Target organism- NewLINK Genetics [Internet]. 2017. Available from: <https://docs.google.com/spreadsheets/d/19otvINcayJURCMg76xWO4KvuyedYbMZDcXqbyJGdcZM/pubhtml#> . [Accessed 31th March 2017]
55. Labiotech.eu. CEVEC is Transforming Vaccine Development starting with Zika 2017. Available from: <https://labiotech.eu/cevec-newlink-genetics-zika-vaccine/>. [Accessed 07th February 2018]
56. NewLink Genetics Corporation Announces Project to Develop New Treatment Options for the Zika Virus [press release]. 2016. Available from: <http://investors.linkp.com/releasedetail.cfm?releaseid=952798>. [Accessed 31th March 2017]
57. WHO Vaccine Pipeline Tracker. ZIKV-Recombinant subunit VLP (fusion)-NewLink Genetics [Internet]. 2017. Available from:

- <https://docs.google.com/spreadsheets/d/19otvINcayJURCMg76xWO4KvuyedYbMZDcXqbyJGdcZM/pubhtml#>  
 . [Accessed 31th March 2017]
58. WHO Vaccine Pipeline Tracker. rZIKV/D4D30 [Internet]. 2017 [cited 210817]. Available from: [http://www.who.int/immunization/research/vaccine\\_pipeline\\_tracker\\_spreadsheet/en/](http://www.who.int/immunization/research/vaccine_pipeline_tracker_spreadsheet/en/). [Accessed 31th March 2017]
59. Novavax. Clinical stage pipeline 2017 Available from: <http://novavax.com/page/11/clinical-stage-pipeline>. [Accessed 07th February 2018]
60. WHO Vaccine Pipeline Tracker. ZIKV envelope diners (EnvD)-Novavax, Inc. - Sf9 cells / Baculo [Internet]. 2017. Available from: <https://docs.google.com/spreadsheets/d/19otvINcayJURCMg76xWO4KvuyedYbMZDcXqbyJGdcZM/pubhtml#>  
 . [Accessed 31th March 2017]
61. Mao H-Q. Nanoparticle delivery of Dna vaccine against Zika virus. Johns Hopkins University: NIAID; 2017. Available from: [https://projectreporter.nih.gov/project\\_info\\_description.cfm?aid=9379639&icde=34675971&ddparam=&ddvalu e=&ddsub=&cr=30&csb=default&cs=ASC&pball=](https://projectreporter.nih.gov/project_info_description.cfm?aid=9379639&icde=34675971&ddparam=&ddvalu e=&ddsub=&cr=30&csb=default&cs=ASC&pball=). [Accessed 07th February 2018]
62. Morrison C. DNA vaccines against Zika virus speed into clinical trials. *Nat Rev Drug Discov*. 2016;15(8):521–2.
63. WHO Vaccine Pipeline Tracker. LAMP-ZIKA nanoDNA- nanoDNA/ZIKA-LAMP chimera construct - Pharos Biologicals. 2017. Available from: <https://docs.google.com/spreadsheets/d/19otvINcayJURCMg76xWO4KvuyedYbMZDcXqbyJGdcZM/pubhtml#>  
 . [Accessed 31th March 2017]
64. Protein Sciences. Vaccines. 2017. Available from: <http://www.proteinsciences.com/VAC.htm>. [Accessed 07th February 2018]
65. WHO Vaccine Pipeline Tracker. ZIKA recombinant- Recombinant subunit (non VLP) - Protein Sciences / Sinergium Biotech / Lab Liomont / UMN [Internet]. 2017. Available from: <https://docs.google.com/spreadsheets/d/19otvINcayJURCMg76xWO4KvuyedYbMZDcXqbyJGdcZM/pubhtml#>  
 . [Accessed 31th March 2017]
66. Replikins Ltd. First Response to Zika Replikins Vaccine Candidates Reported [press release]. *PR Newswire*, 2016. Available from: <http://www.prnewswire.com/news-releases/first-response-to-zika-replikins-vaccine-candidates-reported-300264043.html>. [Accessed 07th February 2018]
67. WHO Vaccine Pipeline Tracker. Replikins Zika vaccine and Bocker-Replikins, Ltd and LLC-peptide [Internet]. 2017. Available from: <https://docs.google.com/spreadsheets/d/19otvINcayJURCMg76xWO4KvuyedYbMZDcXqbyJGdcZM/pubhtml#>. [Accessed 31th March 2017]
68. WHO Vaccine Pipeline Tracker. Chimerivax-Zika-Sanofi Pasteur-Recombinant viral vector [Internet]. 2017. Available from: <https://docs.google.com/spreadsheets/d/19otvINcayJURCMg76xWO4KvuyedYbMZDcXqbyJGdcZM/pubhtml#>  
 . [Accessed 31th March 2017]
69. WHO Vaccine Pipeline Tracker. SCV-CHIKV+ZIKV+YF-Sementis Ltd-ZIKV, YF, and CHIKV surface antigens [Internet]. 2017. Available from: <https://docs.google.com/spreadsheets/d/19otvINcayJURCMg76xWO4KvuyedYbMZDcXqbyJGdcZM/pubhtml#>  
 . [Accessed 31th March 2017]
70. University of South Australia. UniSA-industry partnership seeks vaccine for Zika virus [press release]. 2016. Available from: [http://unisa.edu.au/Media-Centre/Releases/UniSA-industry-partnership-seeks-vaccine-for-Zika-virus/#.WRmh\\_ih97mF](http://unisa.edu.au/Media-Centre/Releases/UniSA-industry-partnership-seeks-vaccine-for-Zika-virus/#.WRmh_ih97mF). [Accessed 07th February 2018]
71. WHO Vaccine Pipeline Tracker. SCV-CHIKV+ZIKV-Sementis Ltd - Recombinant viral vector [Internet]. 2017. Available from: <https://docs.google.com/spreadsheets/d/19otvINcayJURCMg76xWO4KvuyedYbMZDcXqbyJGdcZM/pubhtml#>  
 . [Accessed 31th March 2017]
72. WHO Vaccine Pipeline Tracker. SCV-ZIKV-Sementis Ltd-Recombinant viral vector [Internet]. 2017. Available from: <https://docs.google.com/spreadsheets/d/19otvINcayJURCMg76xWO4KvuyedYbMZDcXqbyJGdcZM/pubhtml#>  
 . [Accessed 31th March 2017]
73. Takeda Pharmaceutical Company Limited. Takeda to develop Zika Vaccine with up to \$312 million in funding from US Government [press release]. 2016. Available from: [https://www.takeda.com/newsroom/newsreleases/2016/Takeda-to-develop-Zika-Vaccine-with-up-to-\\$312-million/](https://www.takeda.com/newsroom/newsreleases/2016/Takeda-to-develop-Zika-Vaccine-with-up-to-$312-million/). [Accessed 07th February 2018]
74. WHO Vaccine Pipeline Tracker. ZIKV-Takeda-Inactivated Whole Target organism. 2017. Available from: <https://docs.google.com/spreadsheets/d/19otvINcayJURCMg76xWO4KvuyedYbMZDcXqbyJGdcZM/pubhtml#>  
 . [Accessed 31th March 2017]

75. Clinicaltrials.gov. Zika-Vaccine Dose Finding Study Regarding Safety, Immunogenicity and Tolerability [Internet]. 2016. Available from: [https://clinicaltrials.gov/ct2/show/NCT02996890?cond=Zika&intr=Vaccine&rank=5&submit\\_fld\\_opt=](https://clinicaltrials.gov/ct2/show/NCT02996890?cond=Zika&intr=Vaccine&rank=5&submit_fld_opt=). [Accessed 31th March 2017]
76. Themis Bioscience. Zika Virus: Themis Bioscience Initiates Worldwide First Study With Live Attenuated Recombinant Vaccine [press release]. 2017. Available from: <http://www.themisbio.com/#/products-and-pipeline>. [Accessed 07th February 2018]
77. WHO Vaccine Pipeline Tracker. ZIKV-Tours University\_Subunit VLP HBV-Zika [Internet]. 2017. Available from: <https://docs.google.com/spreadsheets/d/19otvINcayJURCMg76xWO4KvuyedYbMZDcXqbyJGdcZM/pubhtml#>. [Accessed 31th March 2017]
78. WHO Vaccine Pipeline Tracker. Tracker WVP. ZIKV-INSERM (CYROI, La Reunion)-Prime-Boost Live attenuated + ZIKV exosome. 2017. Available from: <https://docs.google.com/spreadsheets/d/19otvINcayJURCMg76xWO4KvuyedYbMZDcXqbyJGdcZM/pubhtml#>. [Accessed 31th March 2017]
79. WHO Vaccine Pipeline Tracker. ZIKV-Valneva-Inactivated whole target organism [Internet]. 2017. Available from: <https://docs.google.com/spreadsheets/d/19otvINcayJURCMg76xWO4KvuyedYbMZDcXqbyJGdcZM/pubhtml#>. [Accessed 31th March 2017]
80. Valneva. Valneva's Zika vaccine candidate – VLA1601. 2017. Available from: <http://www.valneva.com/en/rd/zika>. [Accessed 07th February 2018]
81. WHO Vaccine Pipeline Tracker. VXA-ZIKAvax [Internet]. 2017. Available from: <https://docs.google.com/spreadsheets/d/19otvINcayJURCMg76xWO4KvuyedYbMZDcXqbyJGdcZM/pubhtml#>. [Accessed 31th March 2017]
82. Vaxart Begins Preclinical Testing of an Oral Zika Virus Vaccine [press release]. 2016. Available from: <http://www.businesswire.com/news/home/20160303005451/en/Vaxart-Begins-Preclinical-Testing-Oral-Zika-Virus>. [Accessed 07th February 2018]
83. VBI Vaccines. Zika Vaccine Program. Available from: <https://www.vbivaccines.com/zika/>. [Accessed 07th February 2018]
84. WHO Vaccine Pipeline Tracker. ZIKV-DNA-WRAIR/BIDMC/Harvard [Internet]. 2017 [cited 04052017]. Available from: <https://docs.google.com/spreadsheets/d/19otvINcayJURCMg76xWO4KvuyedYbMZDcXqbyJGdcZM/pubhtml#>. [Accessed 31th March 2017]
85. WHO Vaccine Pipeline Tracker. ZIKV-Recombinant Viral Vector-WRAIR/BIDMC/Harvard [Internet]. 2017. Available from: <https://docs.google.com/spreadsheets/d/19otvINcayJURCMg76xWO4KvuyedYbMZDcXqbyJGdcZM/pubhtml#>. [Accessed 31th March 2017]
86. PaxVax. PaxVax's Zika Vaccine Pipeline. 2017. Available from: <https://paxvax.com/pipeline>. [Accessed 07th February 2018]
87. Paxvax. Zika Vaccine candidate 2017. Available from: <https://paxvax.com/pipeline/zika-vaccine-candidate/>. [Accessed 07th February 2018]
88. Curiel DT. Gorilla Adenovirus Zika vaccine for Humans. NIAID; 2017. Available from: [https://projectreporter.nih.gov/project\\_info\\_description.cfm?aid=9316943&icde=34675971&ddparam=&ddvalu e3=&ddsub=&cr=10&csb=default&cs=ASC&pball=](https://projectreporter.nih.gov/project_info_description.cfm?aid=9316943&icde=34675971&ddparam=&ddvalu e3=&ddsub=&cr=10&csb=default&cs=ASC&pball=). [Accessed 07th February 2018]
89. Martinez-Sobrido L. Single-cycle infectious Zika viruses for the development of a live-attenuated vaccine. NIAID; 2017. Available from: [https://projectreporter.nih.gov/project\\_info\\_description.cfm?aid=9297627&icde=34675971&ddparam=&ddvalu e=&ddsub=&cr=31&csb=default&cs=ASC&pball=](https://projectreporter.nih.gov/project_info_description.cfm?aid=9297627&icde=34675971&ddparam=&ddvalu e=&ddsub=&cr=31&csb=default&cs=ASC&pball=). [Accessed 07th February 2018]
90. Van Hoeven NS. Development of an innovative, effective, Rna-based vaccine for Zika virus. NIAID; 2016. Available from: [https://projectreporter.nih.gov/project\\_info\\_description.cfm?aid=9256207&icde=34675971&ddparam=&ddvalu e=&ddsub=&cr=46&csb=default&cs=ASC&pball=](https://projectreporter.nih.gov/project_info_description.cfm?aid=9256207&icde=34675971&ddparam=&ddvalu e=&ddsub=&cr=46&csb=default&cs=ASC&pball=). [Accessed 07th February 2018]
91. Richner JM, Himansu S, Dowd KA, Butler SL, Salazar V, Fox JM, et al. Modified mRNA Vaccines Protect against Zika Virus Infection. *Cell*. 2017;168(6):1114–25.e10.
92. Stabilitech. Zika. 2017. Available from: <http://www.stabilitech.com/zika-virus/>. [Accessed 07th February 2018]
93. Slifka MK. An advanced vaccine candidate to prevent Zika virus infection. 2017. Available from: [https://projectreporter.nih.gov/project\\_info\\_details.cfm?aid=9362124&icde=34727062](https://projectreporter.nih.gov/project_info_details.cfm?aid=9362124&icde=34727062). [Accessed 07th February 2018]
94. Pushko P, Lukashevich IS, Weaver SC, Tretyakova I. DNA-launched live-attenuated vaccines for biodefense applications. *Expert review of vaccines*. 2016;15(9):1223-34.



95. Clinicaltrials.gov. VRC 320: A Phase I, Randomized Clinical Trial to Evaluate the Safety and Immunogenicity of a Zika Virus DNA Vaccine, VRC-ZKADNA090-00-VP, Administered Via Needle and Syringe or Needle-free Injector, PharmaJet, in Healthy Adults [Internet]. 2016. Available from: <https://clinicaltrials.gov/ct2/show/record/NCT02996461?cond=Zika&intr=Vaccine&rank=7>. [Accessed 26th January 2018]
96. Tai W, He L, Wang Y, et al. Critical neutralizing fragment of Zika virus EDIII elicits cross-neutralization and protection against divergent Zika viruses. *Emerg Microbes Infect.* 2018;7(1):7.
97. Du L, Zhou Y, Jiang S. The latest advancements in Zika virus vaccine development. *Expert Rev. Vaccines.* 2017; 16(10):951–954.

## Step 2: Cost research

The vaccine EID R&D cost data informing our regression, simulation, and stochastic optimization analyses was collected through the same survey process that we employed to validate the EID R&D pipeline data, described in step 1: Pipeline research above.

From September 2017 to January 2018 we launched a cost data collection process as part of the same survey described in the previous section. A copy of the survey can be accessed in the following weblink, under heading ‘CEPI vaccine R&D pipeline and cost tracking survey’: <http://cepi.net/news>.

Out of the 313 vaccine candidates confirmed through the survey responses, 113 vaccine candidates were reported with full R&D costs by R&D phase. Our definition of full R&D costs included whether reported costs covered all or most critical non-clinical, clinical, chemistry, manufacturing and control (CMC) and regulatory activities associated with each R&D phase, as classified in an R&D scope checklist that was used to assess completeness of cost estimates by R&D phase. (See Appendix table 1.2 for more details)

Based on this criterion, we compiled an initial set of 113 vaccine candidate cost entries. Following on several statistical tests which we describe in more detail in appendix 3, we merged this dataset with additional CEPI data on vaccine project costs to generate a total set of 138 unique vaccine development project cost entries, including information by: R&D phase, platform technology and disease, indirect costs, sectoral affiliation (industry *versus* non-industry) and geographical location of product developers.

Cost estimates reported in this study do not include:

- Basic laboratory research activities (e.g. basic epidemiology and pathogen biology studies; studies for antigen detection, expression, genetic construct, development of new animal models to assist in vaccine design, in-vitro studies, development of functional, neutralization or other assays / immunoassays, etc.)
- Activities associated with Phase IIb/III efficacy testing, CMC, regulatory and delivery
- Activities associated with stockpiles of investigational material for phase IIb/III studies
- Activities associated with manufacturing capacity building or maintenance to support phase IIb/III studies or scale up production in response to public health emergencies

**Appendix table 2.12: R&D scope checklist to support survey-based reporting and quality checking of completeness of EID vaccine R&D costs by R&D phase**

| R&D Phase          | Activities                                                                                                                                                                                                                                                                                                                                                                                                                                                                                                                                                                                                                                                  |
|--------------------|-------------------------------------------------------------------------------------------------------------------------------------------------------------------------------------------------------------------------------------------------------------------------------------------------------------------------------------------------------------------------------------------------------------------------------------------------------------------------------------------------------------------------------------------------------------------------------------------------------------------------------------------------------------|
| <b>Preclinical</b> | <ul style="list-style-type: none"> <li>- Safety &amp; Immunogenicity: Dosing and safety studies in animal models; Toxicology or equivalent studies; Immunogenicity and protective efficacy studies in animal models</li> <li>- Chemistry, Manufacturing and Control (CMC): Establishment of seed lot; Establishment of Good Laboratory Practice (GLP) production / Pilot lot production planning; Potency demonstration/ Identity/ Sterility/ Purity studies; Good Manufacturing Practices (GMP) production consistency studies</li> <li>- Regulatory: Investigational New Drug (IND) or equivalent regulatory advice and application procedures</li> </ul> |
| <b>Phase I</b>     | <ul style="list-style-type: none"> <li>- Safety: Phase Ia studies assessing safety, dosing and adverse events in humans</li> <li>- Immunogenicity: Evaluation of immuno-assays for correlates of immunity and risk in clinical studies; Phase Ia studies assessing immunogenicity in humans</li> <li>- Chemistry, Manufacturing and Control (CMC): Stability studies; Product quality control and quality assurance validation studies; Clinical lot consistency studies</li> <li>- Regulatory: Regulatory planning and clinical trial protocol development</li> </ul>                                                                                      |
| <b>Phase II</b>    | <ul style="list-style-type: none"> <li>- Safety: Phase IIa studies assessing safety, dosing and common short-term side effects in humans</li> <li>- Immunogenicity: Phase IIa studies assessing immune responses in target populations</li> <li>- Chemistry, Manufacturing and Control (CMC): Clinical lot consistency studies and GMP product formulation</li> <li>- Regulatory: Development and finalization of clinical development and regulatory pathway strategy</li> </ul>                                                                                                                                                                           |

## Appendix 2 references

1. Elis RW, Rappuoli R, Ahmed S. Technologies for making new vaccines. In *Vaccines: Sixth Edition*, 2012; 1182–1199. 10.1016/B978-1-4557-0090-5.00013-6.
2. Norheim, G., Oftung, F., Clark, C., Borge, K.S., Dudman, S., Røttingen, J.A. Vaccine development opportunities for 17 priority pathogens: Draft Report. Norwegian Institute of Public Health 2016. (Unpublished)
3. CEPI. Coalition for Epidemic Preparedness Innovations preliminary business plan 2017–2021. November 2016. Available from: <http://cepi.net/sites/default/files/CEPI%20Preliminary%20Business%20Plan%20061216.pdf>. Last accessed 9 February 2017
4. Bente DA, Forrester NL, Watts DM, McAuley AJ, Whitehouse CA, Bray M. Crimean-Congo hemorrhagic fever: History, epidemiology, pathogenesis, clinical syndrome and genetic diversity. *Antiviral Research* 2013; 100(1): 159–89
5. Buttigieg KR, Dowall SD, Findlay-Wilson S, et al. A novel vaccine against Crimean-Congo Haemorrhagic Fever protects 100% of animals against lethal challenge in a mouse model. *PLoS One* 2014; 9(3): e91516
6. Enjuanes L, DeDiego ML, Álvarez E, Deming D, Sheahan T, Baric R. Vaccines to prevent severe acute respiratory syndrome coronavirus-induced disease. *Virus research* 2008; 133(1): 45–62
7. López-Gil E, Lorenzo G, Hevia E, et al. A Single Immunization with MVA Expressing GnGc Glycoproteins Promotes Epitope-specific CD8+ T Cell Activation and Protects Immune-competent Mice against a Lethal RVFV Infection. *PLOS Neglected Tropical Diseases* 2013; 7(7): e2309
8. Mire CE, Geisbert JB, Agans KN, et al. Durability of a Vesicular Stomatitis Virus-Based Marburg Virus Vaccine in Nonhuman Primates. *PLOS ONE* 2014; 9(4): e94355
9. Papa A, Mirazimi A, Köksal I, Estrada-Pena A, Feldmann H. Recent advances in research on Crimean-Congo hemorrhagic fever. *Journal of clinical virology : the official publication of the Pan American Society for Clinical Virology* 2015; 64: 137–43
10. Terasaki K, Tercero BR, Makino S. Single-cycle replicable Rift Valley fever virus mutants as safe vaccine candidates. *Virus Res* 2016; 216: 55–65
11. Warimwe GM, Gesharisha J, Carr BV, et al. Chimpanzee Adenovirus Vaccine Provides Multispecies Protection against Rift Valley Fever. *Scientific Reports* 2016; 6: 20617

## Appendix 3: Statistical methods and results for estimating vaccine development project costs and their explanatory factors

In this appendix we present the details of our statistical tests and regression analysis to determine average vaccine development project cost estimates by R&D phase. We begin with a discussion of the variables considered and the rationale behind these. We then turn to a description of the statistical tests conducted and rationale for performing these, including how their results impacted the final selection of explanatory variables informing the average vaccine development project cost functions.

### Consistency checking

Prior to determining what variables are likely to determine average vaccine development project costs, we checked for consistency of the survey data with CEPI's own database of vaccine R&D budgets. Based on a Student's T-test conducted between the two samples we found no significant inconsistency in the survey data, for both one-tailed and two-tailed tests (see Appendix table 3.1).

**Appendix table 3.1: t-Test: Two-Sample Assuming Unequal Variances**

|                              | CEPI data   | Survey data |
|------------------------------|-------------|-------------|
| Observations                 | 57          | 113         |
| Hypothesized Mean Difference | 0           |             |
| Df                           | 123         |             |
| t Stat                       | 1.008532207 |             |
| P(T<=t) one-tail             | 0.157589464 |             |
| t Critical one-tail          | 1.657336397 |             |
| P(T<=t) two-tail             | 0.315178928 |             |
| t Critical two-tail          | 1.979438685 |             |

These results allowed us to merge the two samples into a new set of 138 unique cost data entries (some of the CEPI cost data was later reported by survey respondents independently, we therefore removed a total of 32 duplicate entries from the final dataset). This check allowed us to minimize the risk of skewing or increasing the reporting bias of the baseline data used to determine average vaccine development project costs.

### Variables

Based on the data made available to us, we constructed the following variables which we assumed may have an explanatory role in the determination of average vaccine project development costs by R&D phase:

- R&D timelines (#years)
- Indirect cost (%) (Such costs may include: (1) In-kind R&D contributions (e.g. training of developing country scientists, sharing of compounds); (2) Overhead costs including, but not limited to, building running costs and general administrative and management costs).
- Product Developer licensure track-record (YES=1/NO=0)
- Industry (YES=1/NO=0)
- Platform technology licensure track-record against any disease (YES=1/NO=0)
- Vaccine licensure track-record against the disease (YES/NO)

All above listed variables are clearly identified as drivers of pharmaceutical R&D costs in numerous literature sources.<sup>1-21</sup> Moreover, in a discussion of cost drivers by R&D phase, survey respondents commonly cited Non-Human Primate studies, toxicology studies, analytical testing and manufacturing/ process development, project management, salaries, consumables, equipment, clinical trial costs associated with numbers of enrollees and locations of studies among several of common reasons for escalation of costs. Other reasons, such as unforeseen regulatory requirements, were also argued to drive vaccine development project costs, but which we could not translate into quantifiable variables due to lack of sufficient information collected via the survey.

It is worth noting that we did not consider geographical location of product developers as a variable, although we do recognize that this can have a more or less substantial effect on R&D costs, for two reasons. First, almost all reported vaccine R&D projects included partners from multiple countries and regions, making it difficult to quantify the relationship between geographical location and cost. Second, our sample size was not large enough to accurately differentiate between geographies and therefore provide significant statistical inferences for our model (only 5 out of 138 vaccine project cost entries were clearly attributed to Low and Middle Income Country organizations).

## Descriptive statistics

Prior to assessing the statistical significance of the constructed variables that would allow us to conclude whether to consider these or not as explanatory factors of average vaccine development projects in our model, we ran some descriptive statistics to assess averages and distributions of the reported data by variable. Appendix table 3.2 summarizes these statistics for the two continuous variables (timelines and indirect cost share) and Appendix table 3.3 summarizes the breakdown of self-reported costs in the survey by data clusters and explanatory variables considered in the regression (for clustering analysis see below) Appendix box plots 3.1 to 3.4 summarize the ranges for the four dichotomous variables (product developer licensure track-record, industry/non-industry, platform technology licensure track-record, disease track-record of licensed vaccines).

As Appendix table 3.2 demonstrates, the average timeline for bringing EID vaccine development projects from preclinical through end of phase II is 6 to 7 years (+/- 2 years) and can arguably range from 4 to 15 years. The average share of indirect costs out of total vaccine development project costs from preclinical through end of phase II is 20-23% (+/- 18%) and can arguably range from 0% to 79%.

**Appendix table 3.2: Descriptive statistics for timelines (#years) and indirect costs (%) from preclinical through phase II (N=138)**

| Descriptive Statistic | R&D timeline preclinical through phase II (# years) | Indirect cost share preclinical through phase II (%) |
|-----------------------|-----------------------------------------------------|------------------------------------------------------|
| Mean                  | ~7 years                                            | ~23%                                                 |
| Standard Deviation    | +/- 2 years                                         | +/-18%                                               |
| Median                | 6 years                                             | 20%                                                  |
| Maximum               | 4 years                                             | 79%                                                  |
| Minimum               | 15 years                                            | 0%                                                   |

**Appendix table 3.3: Self-reported data through survey, by data clusters and explanatory variables considered in regression**

|                                      | Data clusters |           |           | Product Developer licensure track-record |         | Licensed product for disease already exists |        | Industrial sector affiliation of lead developer |        | Licensed products on this platform technology exist |         |
|--------------------------------------|---------------|-----------|-----------|------------------------------------------|---------|---------------------------------------------|--------|-------------------------------------------------|--------|-----------------------------------------------------|---------|
|                                      | Cluster 1     | Cluster 2 | Cluster 3 | (YES =1)                                 | (NO =0) | (YES=1)                                     | (NO=0) | (YES=1)                                         | (NO=0) | (YES =1)                                            | (NO =0) |
| <i>Observations</i>                  |               |           |           |                                          |         |                                             |        |                                                 |        |                                                     |         |
| Total (#)                            | 103           | 21        | 14        | 33                                       | 105     | 10                                          | 128    | 105                                             | 33     | 56                                                  | 82      |
| PD track-record (YES=1) (% of total) | 19%           | 19%       | 64%       | 100%                                     | 0%      | 40%                                         | 23%    | 22%                                             | 30%    | 23%                                                 | 24%     |
| Industry (YES=1) (% of total)        | 76%           | 86%       | 64%       | 70%                                      | 78%     | 70%                                         | 77%    | 100%                                            | 0%     | 77%                                                 | 76%     |
| Licensed disease (YES=1) (% total)   | 9%            | 5%        | 0%        | 12%                                      | 6%      | 100%                                        | 0%     | 7%                                              | 9%     | 5%                                                  | 9%      |
| Licensed tech (YES=1) (% total)      | 42%           | 52%       | 14%       | 39%                                      | 41%     | 30%                                         | 41%    | 41%                                             | 39%    | 100%                                                | 0%      |

As Appendix box plots 3.1 to 3.4 below demonstrate, the distribution of reported costs from preclinical through phase II is skewed more upwards for vaccine developers with previous vaccine licensure track-record than those without (box plot 1), whereas they are relatively the same for technologies for which there are licensed vaccines in other disease settings in comparison to those for which no licensed vaccines exist (box plot 2). In contrast, reported costs from preclinical through phase II are distributed towards the lower end for diseases where licensed vaccines exist than those for which there is licensed vaccine at the time of R&D (box plot 3). Industry reported costs are distributed in a similar manner to non-industry reported estimates, however industry reported costs include significant outliers at the higher end of the reported cost range.

**Appendix box plot 3.1: Total preclinical-phase 2 cost estimates reported by Product Developers, with or without licensure track-record**

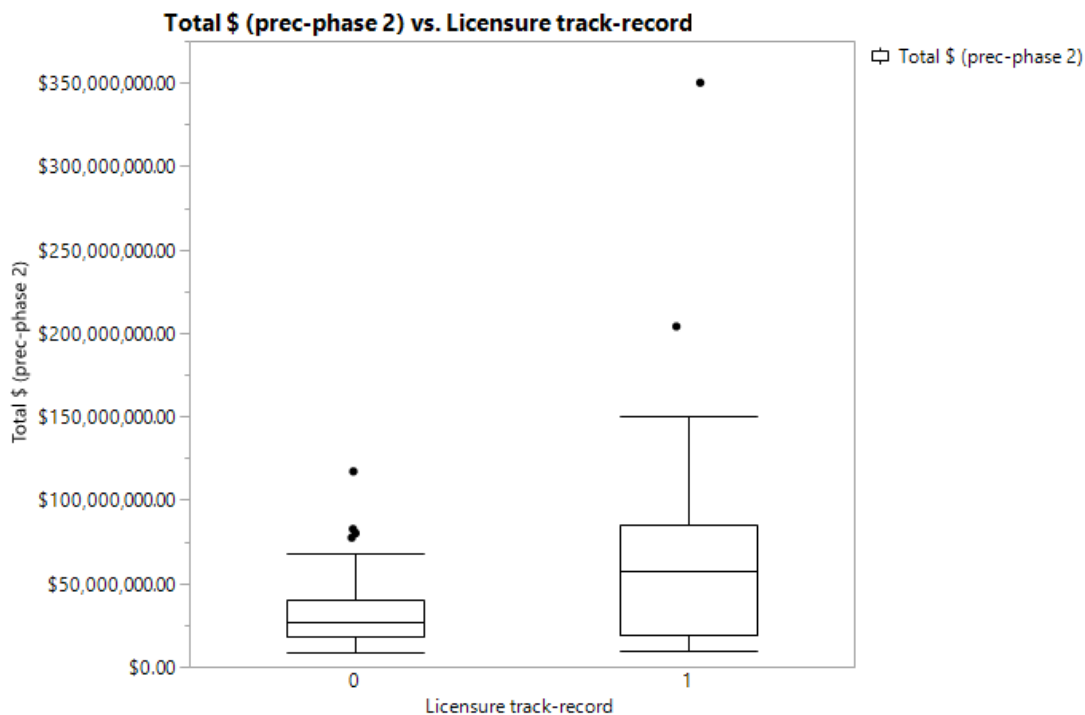

\*Number of observations for licensure track-record (=1) = 33  
 \*\*Number of observations for no licensure track-record (=0) = 105

**Appendix box plot 3.2: Total preclinical-phase 2 cost estimates reported by Product Developers, with or without platform technologies with licensure track-record**

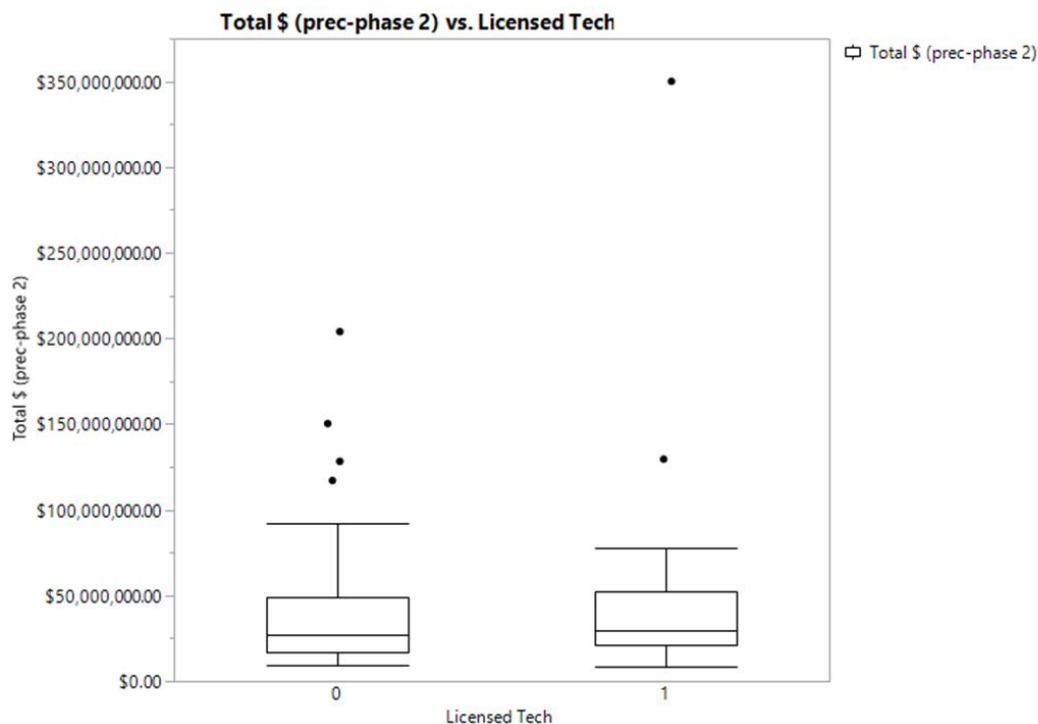

\*Number of observations for licensure track-record (=1) = 56  
 \*\*Number of observations for no licensure track-record (=0) = 82  
 \*\*\*Platform technologies with licensure track-record include: attenuated virus- based technologies; inactivated pathogen- based technologies; Sub-Unit Protein- based technologies  
 Platform technologies with no licensure track-record include: Nucleic acid- based technologies; Peptide- based technologies; Viral vector- based technologies

**Appendix box plot 3.3: Total preclinical-phase 2 cost estimates reported by Product Developers, against diseases with licensed or not licensed vaccines at the time of R&D being conducted**

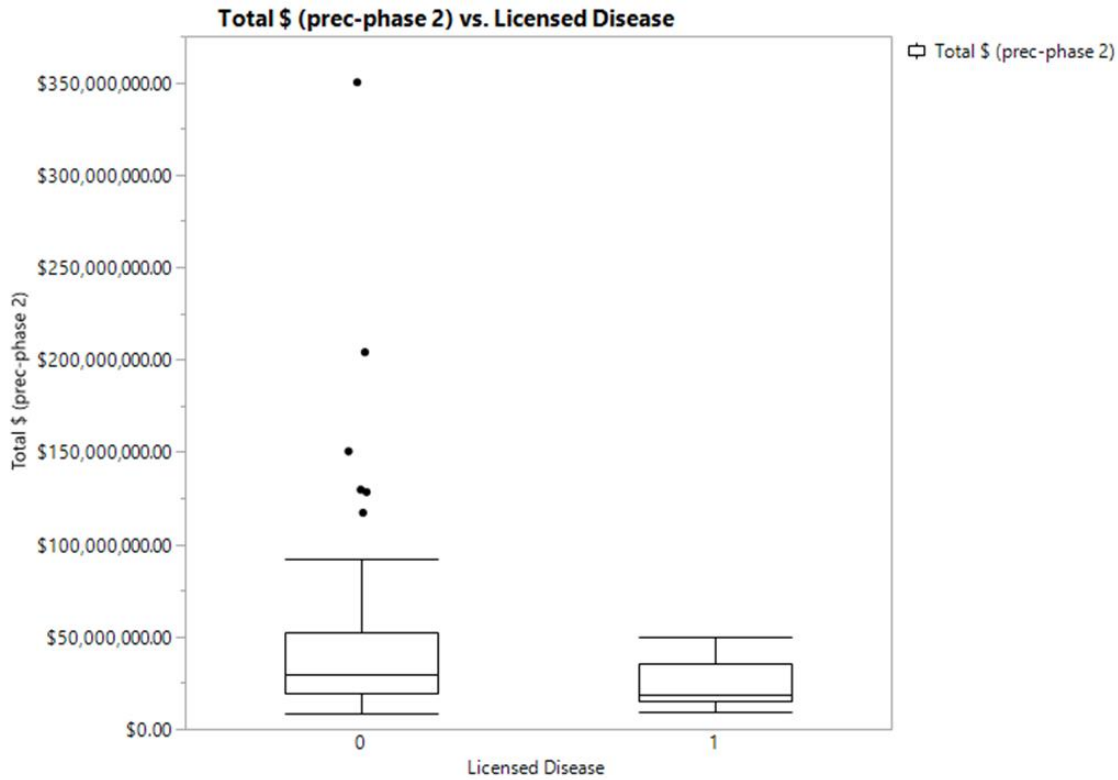

\*Number of observations for licensure track-record (=1) = 10

\*\*Number of observations for no licensure track-record (=0) = 128

\*\*\*Diseases with licensed vaccines at the time of R&D being conducted include: *Hendra; Hepatitis E; IPV; Japanese Encephalitis; Measles; Yellow Fever*

Diseases with no licensed vaccines at the time of R&D being conducted include: *Cambylobacter Jejuni; Chagas; Chikungunya; Cytomegalovirus; Dengue; East Equine Encephalitis; Ebola; ETEC; Human Metapneumovirus; Influenza (universal); Lassa; Marburg; MERS; Nipah; Other Arenaviruses; Pandemic H10N8; Pandemic H7N9; Respiratory Syncytial Virus; Rift Valley Fever; SARS; Venezuelan Equine Encephalitis; West Equine Encephalitis; West Nile Virus; Zika*

**Appendix box plot 3.4: Total preclinical-phase 2 cost estimates reported by industry or non-industry Product Developers**

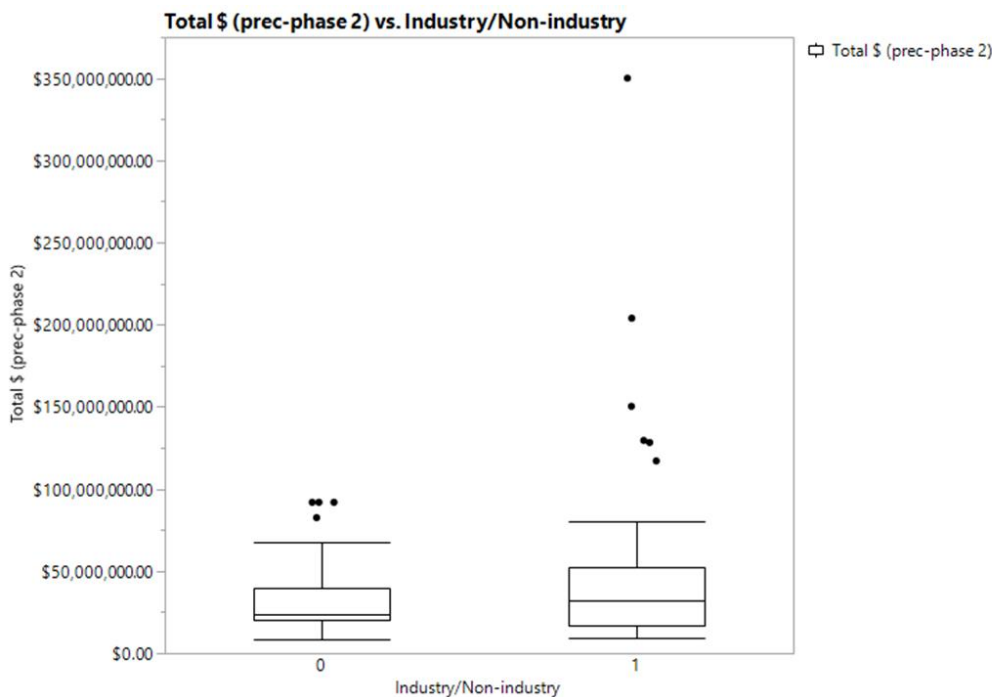

\*Number of observations for industry respondents (=1) = 105

\*\*Number of observations for non-industry respondents (=0) = 33

## Correlation testing

Our next step was to run a correlation test to determine how strongly the considered variables are related to each other. As Appendix table 3.4 demonstrates, there is a weak negative correlation between timelines and product developer licensure track-record (~-0.24) and a weak positive correlation between timelines and platform technology licensure track-record (~0.29). These findings suggest that timelines are likely to be somewhat affected by the level of experience of the product developer undertaking the vaccine R&D project, as well as by the type of platform technology used to develop the vaccine. No other significant relationships between variables were found (correlation coefficient values close to zero).

**Appendix table 3.4: Correlation findings**

|                             | <b>Timelines</b> | <b>Indirect cost (%)</b> | <b>PD track-record YES=1/NO=0</b> | <b>Industry (YES=1/NO=0)</b> | <b>Licensed tech (YES=1/NO=0)</b> | <b>Licensed disease (YES/NO)</b> |
|-----------------------------|------------------|--------------------------|-----------------------------------|------------------------------|-----------------------------------|----------------------------------|
| Timelines                   | 1                |                          |                                   |                              |                                   |                                  |
| Indirect cost (%)           | 0.129486684      | 1                        |                                   |                              |                                   |                                  |
| PD track-record YES=1/NO=0) | -0.239877069     | 0.084900437              | 1                                 |                              |                                   |                                  |
| Industry (YES=1/NO=0)       | 0.086187148      | -0.052764841             | -0.083982684                      | 1                            |                                   |                                  |
| Licensed tech (YES=1/NO=0)  | 0.293382573      | 0.161873462              | -0.013537585                      | 0.013537585                  | 1                                 |                                  |
| Licensed disease (YES/NO)   | 0.026287447      | 0.006986613              | 0.105413533                       | -0.039886202                 | -0.060220857                      | 1                                |

## Regression analysis

In order to determine whether the considered variables are statistically significant explanatory factors of average vaccine development projects by R&D phase, we ran several regressions to identify consistently significant values of these (95% confidence interval). Although there are various types of regression models that can potentially be used, we present below the findings of linear regressions using Ordinary Least Squares (OLS) estimators of the explanatory variables. As we demonstrate below, the coefficient of determination (R squared) is low – i.e. the proportion of the variance in average vaccine development project costs by R&D phase that can be predicted from the explanatory variables in the regression models. This coefficient does not improve when running non-linear (e.g. logarithmic or exponential) regressions, which we also tested. However, the coefficient improves when hierarchically clustering the data. We therefore opted for OLS, which are well-established methods with robust (Best Linear Unbiased Estimator) properties. And we conducted a hierarchical clustering analysis to determine to what extent the predicted cost ranges in our model failed to capture the proportion of the variance in average vaccine development project costs by R&D phase not predicted from the explanatory variables in the regression model.

The general linear multiple regression function for our analytical purposes can be expressed as follows:

$$Y = \text{intercept} + \text{Sum}(biXi) + \text{Sum}(biDi) + \text{Sum}(ei)$$

Where

$Y$  = dependent variable capturing the mean vaccine development project cost by R&D phase

Intercept = Average constant cost of vaccine development by R&D phase at chosen values of explanatory variables

$Xi$  = explanatory variable  $i$  that is continuous (e.g. in our case: timelines, indirect cost)

$Di$  = explanatory variable  $i$  that is dichotomous i.e. it takes either a 0 or 1 value (e.g. in our case: product developer licensure track-record, platform technology licensure track-record, disease track-record of licensed vaccine, industry/non-industry)

$bi$  = coefficient parameter of variable  $Xi$ , which estimates the change in the mean cost of vaccine development per explanatory variable value change, all other explanatory variables held constant

$ei$  = residual, i.e. the cost of vaccine development by R&D phase that cannot be explained by the intercept and explanatory variables included in the cost function

For our six variables previously described, we ran regressions on average vaccine development project costs by R&D phase. As Appendix tables 3.5 to 3.8 demonstrate, only two variables (indirect cost, product developer licensure track-record) are consistently statistically significant across R&D phases (p values for these variables are less than 0.05, suggesting significance within a 95% confidence interval).



**Appendix table 3.5: Exploratory regression statistics for six considered variables, preclinical phase**

|                             | <b>Multiple R</b>   | <b>R Square</b>        | <b>Adjusted R Square</b> | <b>Standard Error</b> | <b>Observations</b>   |
|-----------------------------|---------------------|------------------------|--------------------------|-----------------------|-----------------------|
|                             | 0.5676              | 0.3222                 | 0.2911                   | 14,000,053            | 138                   |
|                             | <b>df</b>           | <b>Sum Square</b>      | <b>Mean Square</b>       | <b>F</b>              | <b>Significance F</b> |
| Regression                  | 6.00                | 12,204,961,821,826,900 | 2,034,160,303,637,820    | 10.378290325          | 0.000000002           |
| Residual                    | 131.00              | 25,676,194,386,044,700 | 196,001,483,862,936      |                       |                       |
| Total                       | 137.00              | 37,881,156,207,871,600 |                          |                       |                       |
|                             | <b>Coefficients</b> | <b>Standard Error</b>  | <b>t Stat</b>            | <b>P-value</b>        |                       |
| Intercept                   | - 118,824           | 3,897,262              | - 0.030                  | 0.976                 |                       |
| Timelines                   | - 188,077           | 453,041                | - 0.415                  | 0.679                 |                       |
| Indirect cost (%)           | 18,741,986          | 6,799,654              | 2.756                    | 0.007                 |                       |
| PD track-record YES=1/NO=0) | 18,694,704          | 2,927,244              | 6.386                    | 0.000                 |                       |
| Industry (YES=1/NO=0)       | 7,231,687           | 2,816,865              | 2.567                    | 0.011                 |                       |
| Licensed tech (YES=1/NO=0)  | 212,515             | 2,571,289              | 0.083                    | 0.934                 |                       |
| Licensed disease (YES/NO)   | - 9,992,501         | 4,646,705              | - 2.150                  | 0.033                 |                       |

**Appendix table 3.6: Exploratory regression statistics for six considered variables, phase I**

|                             | <b>Multiple R</b>   | <b>R Square</b>        | <b>Adjusted R Square</b> | <b>Standard Error</b> | <b>Observations</b>   |
|-----------------------------|---------------------|------------------------|--------------------------|-----------------------|-----------------------|
|                             | 0.4587              | 0.2104                 | 0.1742                   | 8,588,765             | 138                   |
|                             | <b>df</b>           | <b>Sum Square</b>      | <b>Mean Square</b>       | <b>F</b>              | <b>Significance F</b> |
| Regression                  | 6.00                | 2,574,550,353,103,880  | 429,091,725,517,314      | 5.816860566           | 0.000021237           |
| Residual                    | 131.00              | 9,663,462,859,623,110  | 73,766,892,058,192       |                       |                       |
| Total                       | 137.00              | 12,238,013,212,727,000 |                          |                       |                       |
|                             | <b>Coefficients</b> | <b>Standard Error</b>  | <b>t Stat</b>            | <b>P-value</b>        |                       |
| Intercept                   | 448,660             | 2,390,896              | 0.188                    | 0.851                 |                       |
| Timelines                   | 429,070             | 277,932                | 1.544                    | 0.125                 |                       |
| Indirect cost (%)           | 11,766,596          | 4,171,458              | 2.821                    | 0.006                 |                       |
| PD track-record YES=1/NO=0) | 8,164,516           | 1,795,808              | 4.546                    | 0.000                 |                       |
| Industry (YES=1/NO=0)       | 1,932,689           | 1,728,093              | 1.118                    | 0.265                 |                       |
| Licensed tech (YES=1/NO=0)  | - 588,972           | 1,577,436              | - 0.373                  | 0.709                 |                       |
| Licensed disease (YES/NO)   | - 5,281,677         | 2,850,665              | - 1.853                  | 0.066                 |                       |

**Appendix table 3.7: Exploratory regression statistics for six considered variables, phase II**

|                             | <b>Multiple R</b>   | <b>R Square</b>        | <b>Adjusted R Square</b> | <b>Standard Error</b> | <b>Observations</b>   |
|-----------------------------|---------------------|------------------------|--------------------------|-----------------------|-----------------------|
|                             | 0.4142              | 0.1716                 | 0.1336                   | 15,225,809            | 138                   |
|                             | <b>df</b>           | <b>Sum Square</b>      | <b>Mean Square</b>       | <b>F</b>              | <b>Significance F</b> |
| Regression                  | 6.00                | 6,289,010,935,437,650  | 1,048,168,489,239,610    | 4.521372976           | 0.000337977           |
| Residual                    | 131.00              | 30,369,109,743,942,500 | 231,825,265,220,935      |                       |                       |
| Total                       | 137.00              | 36,658,120,679,380,200 |                          |                       |                       |
|                             | <b>Coefficients</b> | <b>Standard Error</b>  | <b>t Stat</b>            | <b>P-value</b>        |                       |
| Intercept                   | 7,594,841           | 4,238,482              | 1.792                    | 0.075                 |                       |
| Timelines                   | 741,523             | 492,706                | 1.505                    | 0.135                 |                       |
| Indirect cost (%)           | 20,425,013          | 7,394,989              | 2.762                    | 0.007                 |                       |
| PD track-record YES=1/NO=0) | 12,311,901          | 3,183,535              | 3.867                    | 0.000                 |                       |
| Industry (YES=1/NO=0)       | 1,736,393           | 3,063,492              | 0.567                    | 0.572                 |                       |
| Licensed tech (YES=1/NO=0)  | - 2,566,669         | 2,796,414              | - 0.918                  | 0.360                 |                       |
| Licensed disease (YES/NO)   | - 8,027,628         | 5,053,541              | - 1.589                  | 0.115                 |                       |

**Appendix table 3.8: Exploratory regression statistics for six considered variables, Total preclinical - phase II**

|                             | Multiple R   | R Square                | Adjusted R Square     | Standard Error | Observations   |
|-----------------------------|--------------|-------------------------|-----------------------|----------------|----------------|
|                             | 0.5010       | 0.2510                  | 0.2167                | 35,366,432     | 138            |
|                             | df           | Sum Square              | Mean Square           | F              | Significance F |
| Regression                  | 6.00         | 54,916,978,260,331,200  | 9,152,829,710,055,210 | 7.317671173    | 0.000000927    |
| Residual                    | 131.00       | 163,852,770,054,642,000 | 1,250,784,504,233,910 |                |                |
| Total                       | 137.00       | 218,769,748,314,973,000 |                       |                |                |
|                             | Coefficients | Standard Error          | t Stat                | P-value        |                |
| Intercept                   | 7,924,667    | 9,845,123               | 0.805                 | 0.422          |                |
| Timelines                   | 982,517      | 1,144,456               | 0.859                 | 0.392          |                |
| Indirect cost (%)           | 50,933,579   | 17,177,042              | 2.965                 | 0.004          |                |
| PD track-record YES=1/NO=0) | 39,171,132   | 7,394,698               | 5.297                 | 0.000          |                |
| Industry (YES=1/NO=0)       | 10,900,759   | 7,115,863               | 1.532                 | 0.128          |                |
| Licensed tech (YES=1/NO=0)  | - 2,943,114  | 6,495,497               | - 0.453               | 0.651          |                |
| Licensed disease (YES/NO)   | - 23,301,799 | 11,738,340              | - 1.985               | 0.049          |                |

**Hierarchical clustering analysis**

It is worth noting that for all regressions the outputs of which are presented in Appendix tables 3.5 to 3.8 above, the results are reliable (given that Significance F is less than 0.05 in all regressions), however there is a great deal of variation in average cost estimates that is not sufficiently explained by any standalone or combinations of the considered explanatory variables (R Squared is less than 0.28 in all regression; Multiple R Squared is less than 0.48 in all regressions; and there are large residual values).

We therefore ran a hierarchical clustering analysis to identify potential clusters of cost estimates in our sample and associated cost drivers not captured in the tested variables above which could improve the explanatory power of the model. We did this by computing the distance between clusters using a Euclidean metric as the similarity measure for our data. The results are presented in appendix dendrograms 3.1 and 3.2 and appendix table 3.9 below.

As the vertical distances between sub-clusters in the dendrograms show, no strong clustering effect becomes immediately apparent. When testing for clusters at the preclinical cost level (appendix dendrogram 3.1), sub-clusters 5 and 9 contain only 4 out of 138 observations. Sub-cluster 10 is a single observation, and so is sub-cluster 4. All other observations are contained in the remaining sub-clusters, whose distance in cost terms is very small. Similarly, when testing for clusters at the clinical cost level (appendix dendrogram 3.2), sub-clusters 3 and 9 each concern single observations, whereas all other observations are contained in the remaining sub-clusters, whose distance in cost terms is again very small.

**Appendix dendrogram 3.1.: Dendrogram of cost data clusters, preclinical phase**

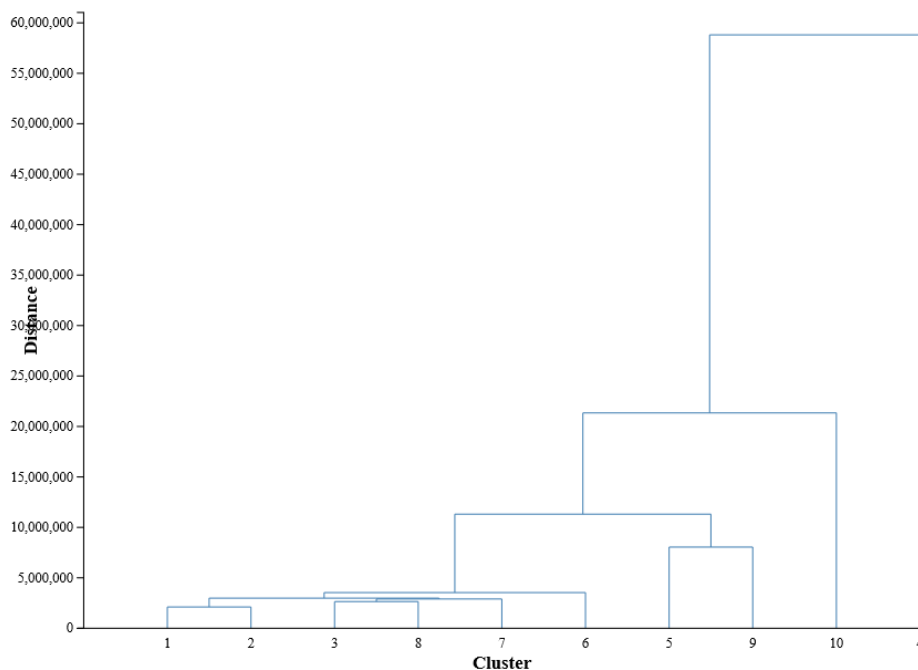

**Appendix figure 3.2.: Dendrogram of cost data clusters, clinical phases I & II**

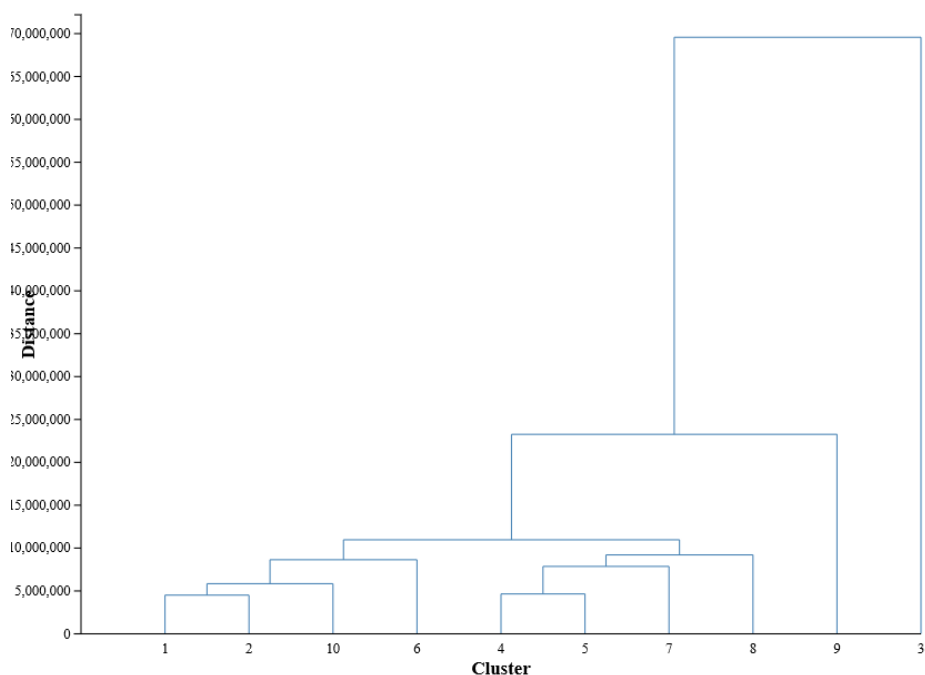

Looking at the total number of cost observations per cluster for the preclinical phase, 119 are contained in sub-cluster 1 and the remaining observations are distributed in very small numbers between 1 and 5 across sub-clusters 2 and 10. However, at the clinical phase, sub-cluster 1 reduces its total number of observations to 103, and sub-cluster 2 increases its observations to 21. All other observations are distributed in small numbers between 1 and 5 across sub-clusters 3 to 10. When grouping together the clinical phase sub-clusters into three main clusters 1, 2, and 3 (this includes sub-clusters 3 to 10), we identified:

- One cluster (cluster 3 - comprised of sub-clusters 1 to 3) concerning cost estimates reported by vaccine developers with previous licensure experience, representing both industry and non-industry sectors, concerning costs for diseases where no vaccine had been previously licensed at the time of R&D, and representing both well-established and less established platform technologies.
- A second cluster (cluster 2) concerning cost estimates reported by vaccine developers with limited licensure experience, representing predominantly industry, concerning costs for diseases where no vaccine had been previously licensed at the time of R&D, and representing both well-established and less established platform technologies.
- The remaining sample observations excluded from clusters 2 and 3 (cluster 1), concerning cost estimates reported by vaccine developers with limited licensure experience, representing both industry and non-industry sectors, concerning costs for diseases where no vaccine had been previously licensed at the time of R&D, and representing both well-established and less established platform technologies.

**Appendix table 3.9: Concentration of cost sample observations by cluster, by explanatory variable considered in the regression**

| Observations                         | Cluster 1 | Cluster 2 | Cluster 3 |
|--------------------------------------|-----------|-----------|-----------|
| Total (#)                            | 103       | 21        | 14        |
| PD track-record (YES=1) (% of total) | 19%       | 19%       | 64%       |
| Industry (YES=1) (% of total)        | 76%       | 86%       | 64%       |
| Licensed disease (YES=1) (% total)   | 9%        | 5%        | 0%        |
| Licensed tech (YES=1) (% total)      | 42%       | 52%       | 14%       |

Applying this clustering to the regression model and removing all other variables improves the coefficient of determination, at least for the clinical development phases, as demonstrated by the increased R square in Appendix table 3.10 below. This finding, in combination with the above, may suggest that increased R&D costs, particularly at clinical R&D phases, may potentially be associated with increased industrial sector affiliation but that the greatest increase in costs is associated with previous licensure track-record. However, as the same table suggests, the modes and boundaries of the estimated R&D cost distributions per R&D phase remain very close between the regression model that accounts for this clustering effect and the regression model that accounts for the statistically significant explanatory variables presented in the previous section.

**Appendix table 3.10: Exploratory regression statistics for six considered variables of vaccine R&D cost, preclinical through end of phase IIa**

|                                | <i>6 variables considered</i> |                |                 | <i>3 variables considered</i> |                |                 | <i>Clusters only considered</i> |                |                 |
|--------------------------------|-------------------------------|----------------|-----------------|-------------------------------|----------------|-----------------|---------------------------------|----------------|-----------------|
|                                | <i>Preclinical</i>            | <i>Phase I</i> | <i>Phase II</i> | <i>Preclinical</i>            | <i>Phase I</i> | <i>Phase II</i> | <i>Preclinical</i>              | <i>Phase I</i> | <i>Phase II</i> |
| Observations                   | 138                           | 138            | 138             | 138                           | 138            | 138             | 138                             | 138            | 138             |
|                                | 0.5676                        | 0.4587         | 0.4142          | 0.5365                        | 0.4092         | 0.3728          | 0.5912                          | 0.7772         | 0.8123          |
| R Square                       | 0.3222                        | 0.2104         | 0.1716          | 0.2878                        | 0.1675         | 0.1390          | 0.3495                          | 0.6041         | 0.6598          |
| Adjusted R Square              | 0.2911                        | 0.1742         | 0.1336          | 0.2719                        | 0.1551         | 0.1263          | 0.3399                          | 0.5982         | 0.6548          |
| Standard Error                 | \$14m                         | \$9m           | \$15m           | \$14m                         | \$9m           | \$15m           | \$14m                           | \$6m           | \$10m           |
| Significance F                 | 0.000                         | 0.000          | 0.000           | 0.000                         | 0.000          | 0.000           | 0.000                           | 0.000          | 0.000           |
| <i>P-values</i>                |                               |                |                 |                               |                |                 |                                 |                |                 |
| Intercept                      | 0.976                         | 0.851          | 0.075           | 0.024                         | 0.001          | 0.000           | 0.000                           | 0.000          | 0.000           |
| Timelines (#years)             | 0.679                         | 0.125          | 0.135           | NA                            | NA             | NA              | NA                              | NA             | NA              |
| Indirect cost (%)              | 0.007                         | 0.006          | 0.007           | 0.010                         | 0.003          | 0.005           | NA                              | NA             | NA              |
| PD track-record (dichotomous)  | 0.0000                        | 0.0000         | 0.0000          | 0.000                         | 0.000          | 0.001           | NA                              | NA             | NA              |
| Industry (dichotomous)         | 0.011                         | 0.265          | 0.572           | NA                            | NA             | NA              | NA                              | NA             | NA              |
| Licensed tech (dichotomous)    | 0.934                         | 0.709          | 0.36            | NA                            | NA             | NA              | NA                              | NA             | NA              |
| Licensed disease (dichotomous) | 0.033                         | 0.066          | 0.115           | 0.027                         | 0.006          | 0.1             | NA                              | NA             | NA              |
| Cluster 2                      | NA                            | NA             | NA              | NA                            | NA             | NA              | 0.1                             | 0.000          | 0.000           |
| Cluster 3                      | NA                            | NA             | NA              | NA                            | NA             | NA              | 0.000                           | 0.000          | 0.000           |

## Analysis of Variance (ANOVA) testing

We ran an ANOVA to test whether the average vaccine development project cost estimates by R&D phase are statistically equal across explanatory variables included in the model. As Appendix tables 3.11 to 3.13 demonstrate, there is a significant source of variation in cost estimates between product developers with licensure track-record and all other variables. Results from both one-tailed and two-tailed t-tests are also provided in tables 3.11 to 3.13 below.

**Appendix table 3.11: ANOVA single factor and t-Test two-sample assuming unequal variances, preclinical**

| <b>Anova: Single Factor</b> |              |               |                |                     |  |
|-----------------------------|--------------|---------------|----------------|---------------------|--|
| <b>Groups</b>               | <b>Count</b> | <b>Sum</b>    | <b>Average</b> | <b>Variance</b>     |  |
| PD track-record YES=1       | 33           | 867,401,039   | 26,284,880     | 803,483,567,916,375 |  |
| PD track-record NO=0        | 105          | 825,990,434   | 7,866,576      | 35,115,003,439,485  |  |
| Industry YES=1              | 105          | 1,423,567,211 | 13,557,783     | 337,789,373,741,060 |  |
| Industry NO=0               | 33           | 269,824,261   | 8,176,493      | 63,248,643,525,856  |  |
| Licensed tech YES=1         | 56           | 726,536,692   | 12,973,869     | 428,865,418,267,238 |  |
| Licensed tech NO=0          | 82           | 966,854,780   | 11,790,912     | 175,888,802,991,404 |  |
| Licensed disease YES=1      | 10           | 55,806,500    | 5,580,650      | 16,704,012,558,333  |  |
| Licensed disease NO=0       | 128          | 1,637,584,972 | 12,793,633     | 293,293,304,928,347 |  |

| <b>Source of Variation</b> | <b>Sum Square</b>       | <b>df</b> | <b>Mean Square</b>    | <b>F</b> | <b>P-value</b> | <b>F crit</b> |
|----------------------------|-------------------------|-----------|-----------------------|----------|----------------|---------------|
| Between Groups             | 9,773,961,952,630,980   | 7         | 1,396,280,278,947,280 | 5.358539 | 0.000006       | 2.02640       |
| Within Groups              | 141,750,662,878,855,000 | 544       | 260,571,071,468,483   | 1        |                |               |
| Total                      | 151,524,624,831,486,000 | 551       |                       |          |                |               |

### t-Test: Two-Sample Assuming Unequal Variances (PD track-record YES=1 versus other variables)

|                     | <b>PD track-record<br/>NO=0</b> | <b>Industry<br/>YES=1</b> | <b>Industry<br/>NO=0</b> | <b>Licensed<br/>tech<br/>YES=1</b> | <b>Licensed<br/>tech<br/>NO=0</b> | <b>Licensed<br/>disease<br/>YES=1</b> | <b>Licensed<br/>disease<br/>NO=0</b> |
|---------------------|---------------------------------|---------------------------|--------------------------|------------------------------------|-----------------------------------|---------------------------------------|--------------------------------------|
| Df                  | 33                              | 41                        | 37                       | 52                                 | 38                                | 36                                    | 38                                   |
| t Stat              | 3.707                           | 2.424                     | 3.533                    | 2.353                              | 2.816                             | 4.059                                 | 2.614                                |
| P(T<=t) one-tail    | 0.000                           | 0.010                     | 0.001                    | 0.011                              | 0.004                             | 0.000                                 | 0.006                                |
| t Critical one-tail | 1.692                           | 1.683                     | 1.687                    | 1.675                              | 1.686                             | 1.688                                 | 1.686                                |
| P(T<=t) two-tail    | 0.001                           | 0.020                     | 0.001                    | 0.022                              | 0.008                             | 0.000                                 | 0.013                                |
| t Critical two-tail | 2.035                           | 2.020                     | 2.026                    | 2.007                              | 2.024                             | 2.028                                 | 2.024                                |

**Appendix table 3.12: ANOVA single factor and t-Test two-sample assuming unequal variances, phase I**

**Anova: Single Factor**

| Groups                 | Count | Sum           | Average    | Variance            |
|------------------------|-------|---------------|------------|---------------------|
| PD track-record YES=1  | 33    | 468,833,200   | 14,207,067 | 233,033,295,881,201 |
| PD track-record NO=0   | 105   | 714,691,672   | 6,806,587  | 32,748,244,738,700  |
| Industry YES=1         | 105   | 934,490,529   | 8,899,910  | 100,599,773,071,757 |
| Industry NO=0          | 33    | 249,034,343   | 7,546,495  | 54,051,388,658,770  |
| Licensed tech YES=1    | 56    | 511,536,402   | 9,134,579  | 104,547,774,615,255 |
| Licensed tech NO=0     | 82    | 671,988,470   | 8,194,981  | 79,734,675,155,287  |
| Licensed disease YES=1 | 10    | 51,042,500    | 5,104,250  | 15,044,365,402,778  |
| Licensed disease NO=0  | 128   | 1,132,482,372 | 8,847,519  | 94,272,811,001,822  |

| Source of Variation | Sum Square             | df  | Mean Square        | F         | P-value  | F crit  |
|---------------------|------------------------|-----|--------------------|-----------|----------|---------|
| Between Groups      | 1,580,466,516,067,730  | 7   | 25,780,930,866,818 | 2.5927953 | 0.012266 | 2.02640 |
| Within Groups       | 47,371,586,334,840,200 | 544 | 7,080,121,939,045  |           |          |         |
| Total               | 48,952,052,850,907,900 | 551 |                    |           |          |         |

**t-Test: Two-Sample Assuming Unequal Variances (PD track-record YES=1 versus other variables)**

|                     | PD track-record NO=0 | Industry YES=1 | Industry NO=0 | Licensed tech YES=1 | Licensed tech NO=0 | Licensed disease YES=1 | Licensed disease NO=0 |
|---------------------|----------------------|----------------|---------------|---------------------|--------------------|------------------------|-----------------------|
| Df                  | 35                   | 41             | 46            | 49                  | 41                 | 41                     | 39                    |
| t Stat              | 2.725                | 1.874          | 2.258         | 1.698               | 2.121              | 3.110                  | 1.919                 |
| P(T<=t) one-tail    | 0.005                | 0.034          | 0.014         | 0.048               | 0.020              | 0.002                  | 0.031                 |
| t Critical one-tail | 1.690                | 1.683          | 1.679         | 1.677               | 1.683              | 1.683                  | 1.685                 |
| P(T<=t) two-tail    | 0.010                | 0.068          | 0.029         | 0.096               | 0.040              | 0.003                  | 0.062                 |
| t Critical two-tail | 2.030                | 2.020          | 2.013         | 2.010               | 2.020              | 2.020                  | 2.023                 |

**Appendix table 3.13: ANOVA single factor and t-Test two-sample assuming unequal variances, phase II**

**Anova: Single Factor**

| Groups                 | Count | Sum           | Average    | Variance            |
|------------------------|-------|---------------|------------|---------------------|
| PD track-record YES=1  | 33    | 924,078,219   | 28,002,370 | 687,821,296,459,282 |
| PD track-record NO=0   | 95    | 651,777,596   | 6,860,817  | 111,122,022,648,137 |
| Industry YES=1         | 105   | 2,064,475,820 | 19,661,674 | 315,250,134,797,915 |
| Industry NO=0          | 33    | 621,330,168   | 18,828,187 | 120,458,237,847,132 |
| Licensed tech YES=1    | 56    | 1,091,477,869 | 19,490,676 | 356,658,345,530,359 |
| Licensed tech NO=0     | 82    | 1,594,328,118 | 19,443,026 | 210,393,038,536,530 |
| Licensed disease YES=1 | 10    | 144,551,000   | 14,455,100 | 37,308,432,544,444  |
| Licensed disease NO=0  | 128   | 2,541,254,988 | 19,853,555 | 283,874,252,037,103 |

| Source of Variation | Sum Square              | df  | Mean Square           | F         | P-value  | F crit  |
|---------------------|-------------------------|-----|-----------------------|-----------|----------|---------|
| Between Groups      | 16,234,682,363,794,800  | 7   | 2,319,240,337,684,980 | 8.7129202 | 0.000000 | 2.02672 |
| Within Groups       | 142,142,280,272,954,000 | 534 | 266,184,045,454,970   |           |          |         |
| Total               | 158,376,962,636,749,000 | 541 |                       |           |          |         |

**t-Test: Two-Sample Assuming Unequal Variances (PD track-record YES=1 versus other variables)**

|                     | PD track-record<br>NO=0 | Industry<br>YES=1 | Industry<br>NO=0 | Licensed<br>tech<br>YES=1 | Licensed<br>tech<br>NO=0 | Licensed<br>disease<br>YES=1 | Licensed<br>disease<br>NO=0 |
|---------------------|-------------------------|-------------------|------------------|---------------------------|--------------------------|------------------------------|-----------------------------|
| Df                  | 40                      | 42                | 43               | 52                        | 40                       | 40                           | 39                          |
| t Stat              | 2.410                   | 1.708             | 1.854            | 1.632                     | 1.769                    | 2.733                        | 1.697                       |
| P(T<=t) one-tail    | 0.010                   | 0.048             | 0.035            | 0.054                     | 0.042                    | 0.005                        | 0.049                       |
| t Critical one-tail | 1.684                   | 1.682             | 1.681            | 1.675                     | 1.684                    | 1.684                        | 1.685                       |
| P(T<=t) two-tail    | 0.021                   | 0.095             | 0.071            | 0.109                     | 0.085                    | 0.009                        | 0.098                       |
| t Critical two-tail | 2.021                   | 2.018             | 2.017            | 2.007                     | 2.021                    | 2.021                        | 2.023                       |

**Implications**

Based on the findings presented in this appendix, product developer licensure track-record and indirect costs are significant explanatory factors of R&D costs. However, there is a substantial variation in self reported cost estimates that cannot be adequately explained by clustering or explanatory variables considered in the regression.

### Appendix 3 references

1. World Health Organization. An R&D blueprint for action to prevent epidemics: Funding & coordination models for preparedness and response. May 2016. [http://www.who.int/csr/research-and-development/workstream\\_5\\_document\\_on\\_financing.pdf](http://www.who.int/csr/research-and-development/workstream_5_document_on_financing.pdf). Last accessed 28 March 2017
2. Wilson P. Giving developing countries the best shot: An overview of vaccine access and R&D. Campaign for Access to Essential Medicines, Medecins Sans Frontieres. April 2010. Chit A, Parker J, Halperin SA, Papadimitropoulos M, Krahn M, Grootendorst P. Toward more specific and transparent research and development costs: the case of seasonal influenza vaccines. *Vaccine*. 2014;32(26):3336–40. Last accessed 6<sup>th</sup> February 2018
3. Scherer FM. Research and Development Costs and Productivity in Biopharmaceuticals A2 - Culyer, Anthony J. Encyclopedia of Health Economics. San Diego: Elsevier; 2014. p. 249–55.
4. Gregersen J-P. Scientific, Technical and Economic Aspects of Vaccine Research and Development. Pharmaceutical Biotechnology: Wiley–VCH Verlag GmbH & Co. KGaA; 2005. p. 57–77.
5. DiMasi JA, Grabowski HG, Vernon J. R&D costs and returns by therapeutic category. *Drug Information Journal*. 2004;38(3):211–23.
6. DiMasi JA, Hansen RW, Grabowski HG. The price of innovation: new estimates of drug development costs. *Journal of health economics*. 2003;22(2):151–85.
7. DiMasi JA, Hansen RW, Grabowski HG, Lasagna L. Cost of innovation in the pharmaceutical industry. *Journal of health economics*. 1991;10(2):107–42.
8. DiMasi JA, Hansen RW, Grabowski HG, Lasagna L. Research and development costs for new drugs by therapeutic category. A study of the US pharmaceutical industry. *PharmacoEconomics*. 1995;7(2):152–69.
9. Adams CP and Brantner VV. Estimating The Cost Of New Drug Development: Is It Really \$802 Million? *Health Affairs*. 2006;25(2):420–8.
10. DiMasi JA, Grabowski HG. The cost of biopharmaceutical R&D: is biotech different? *Managerial and decision Economics*. 2007;28(4- 5):469–79.
11. DiMasi JA, Grabowski HG. Economics of new oncology drug development. *Journal of clinical oncology : official journal of the American Society of Clinical Oncology*. 2007;25(2):209–16.
12. DiMasi JA, Grabowski HG, Hansen RW. Innovation in the pharmaceutical industry: New estimates of R&D costs. *Journal of health economics*. 2016;47:20–33.
13. Light DW, Andrus JK, Warburton RN. Estimated research and development costs of rotavirus vaccines. *Vaccine*. 2009;27(47):6627–33.
14. Mestre-Ferrandiz J, Sussex, J. and Towse, A. The R&D Cost of a New Medicine. *Office of Health Economics*; 2012.
15. Morgan S, Grootendorst P, Lexchin J, Cunningham C, Greyson D. The cost of drug development: A systematic review. *Health Policy*. 2011;100(1):4–17.
16. Paul SM, Mytelka DS, Dunwiddie CT, Persinger CC, Munos BH, Lindborg SR, et al. How to improve R&D productivity: the pharmaceutical industry's grand challenge. *Nature reviews Drug discovery*. 2010;9(3):203.
17. Rawlins MD. Cutting the cost of drug development? *Nature Reviews Drug Discovery*. 2004;3:360.
18. Vernon JA, Golec JH, Dimasi JA. Drug development costs when financial risk is measured using the Fama-French three-factor model. *Health Economics*. 2010;19(8):1002–5.
19. Waye A, Jacobs P, Schryvers AB. Vaccine development costs: a review. *Expert Rev Vaccines*. 2013;12(12):1495–501.
20. Plotkin S, Robinson JM, Cunningham G, Iqbal R, Larsen S. The complexity and cost of vaccine manufacturing - An overview. *Vaccine*. 2017;35(33):4064–71.
21. Special Programme for Research and Training in Tropical Diseases (TDR). Health product research & development fund: a proposal for financing and operation. World Health Organization on behalf of the Special Programme for Research and Training in Tropical Diseases 2016.



## **Appendix 4: Monte Carlo Simulations for determining R&D costs associated with current vaccine pipeline structures for 11 EIDs**

In this appendix we present the details of our Monte Carlo simulation methodology and scenario analysis to determine the expected total cost for bringing a portfolio of vaccines through end of phase IIa, out of initial investments in 194 preclinical, 24 clinical phase I, and 6 phase II vaccine candidates for 11 EIDs, accounting for risk of failure.

We begin with a discussion of the parameters and assumptions underlying the simulation, including how we constructed the cost and PoS distributions defining the different simulation scenarios. We then turn to the steps undertaken from random sampling to estimating total expected vaccine R&D costs from preclinical through phase II.

### **Simulation parameters**

The estimation of total vaccine R&D costs from preclinical phase through clinical phase II is dependent on the number of preclinical and clinical EID vaccine candidates currently available in the R&D pipeline and their combination with two sets of randomized input parameters to generate expected phase II and associated R&D cost outputs:

- Cost by R&D phase
- PoS by R&D phase

In setting our cost by R&D phase parameters, we relied on the self-reported cost estimates provided by vaccine developers through the survey (appendix 2) categorized in two groups: a lower bound group with cost estimates based on product developers with no previous licensure track-record; and an upper bound group with cost estimates based on product developers with licensure track-record. For each of these groups, we took the self-reported cost estimates and created ranges of costs; range boundaries being defined by the lowest and highest reported cost estimates for each respective group. We assigned equal probabilities to these costs, to construct discrete distributions of costs by R&D phase.

The figures below present the cumulative distribution functions for the lower and upper bounds of vaccine R&D costs by R&D phase. These figures demonstrate that vaccine project costs used for the simulation scenarios fall between:

- US\$ 1.7m – US\$ 140m (upper bound) and US\$ 1.8m – US\$ 37.4m (lower bound) for preclinical
- US\$ 1.9m – US\$ 70m (upper bound) and US\$ 1m – US\$ 30.2m (lower bound) for phase I
- US\$ 3.8m – US\$ 140m (upper bound) and US\$ 4.4m – US\$ 54.5m (lower bound) for phase II

**Figures 4.1 to 4.3.: Upper bound cumulative cost distributions by R&D phase, based on product developers with previous vaccine licensure track-record**

**Figures 4.4. to 4.6.: Lower bound cumulative cost distributions by R&D phase, based on product developers with no vaccine licensure track-record**

Preclinical phase

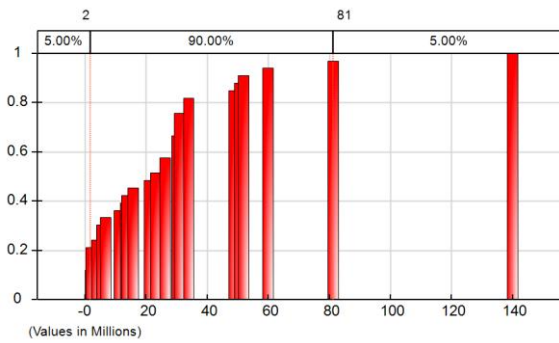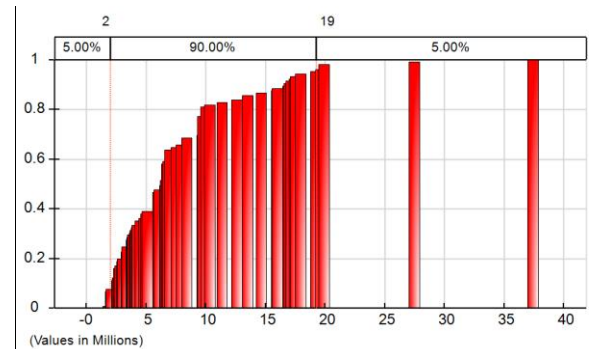

Phase I

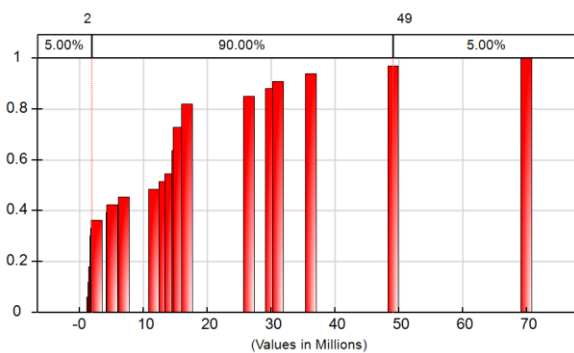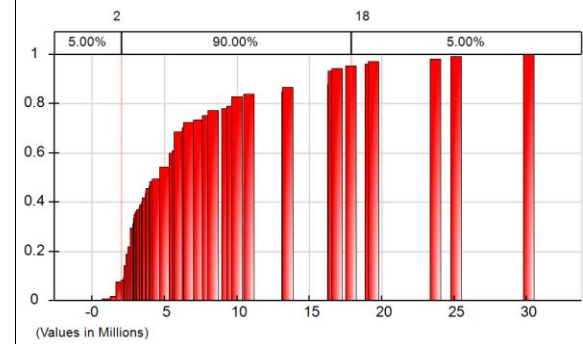

Phase II

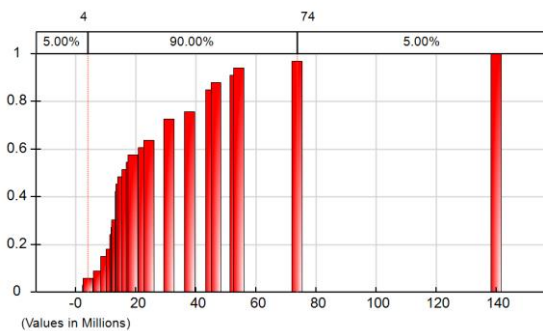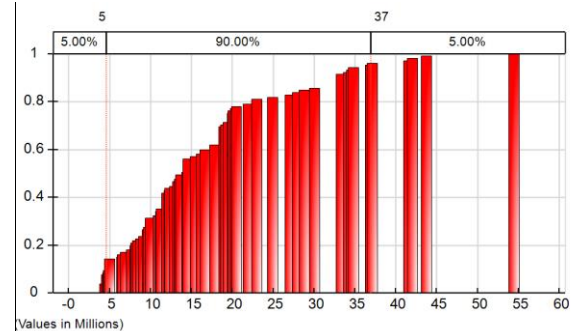

*\*X axis shows the self-reported cost estimates; Y axis shows their cumulative frequency*

In setting our PoS by R&D phase parameters, we relied on published evidence of estimates of vaccine R&D PoS by R&D phase in the literature and a number of key assumptions. The literature sources and their associated estimates of vaccine R&D PoS by R&D phase are listed in table 1 of the main article. As that table demonstrates, the literature on vaccine R&D PoS is not consistent, with variable estimates of PoS by R&D phase suggested by different sources. To capture this variability in previously published vaccine R&D PoS estimates, we assumed three PoS distribution scenarios, whereby:

- The lower PoS scenario is defined for each R&D phase by lower and upper bounds equivalent to the lowest and highest PoS estimates in the literature, and a modal value equivalent to the lowest published estimate of PoS
- The higher PoS scenario is defined for each R&D phase by lower and upper bounds equivalent to the lowest and highest PoS estimates in the literature, and a modal value equivalent to the highest published estimate of PoS
- The base case PoS scenario is defined for each R&D phase by lower and upper bounds equivalent to the lowest and highest PoS estimates in the literature, and a modal value equivalent to Pronker's estimates,<sup>1</sup> acknowledging that this research provides one of the most comprehensive and recently updated sources of PoS estimates on vaccine R&D.

The figures below present the frequency and cumulative distribution functions for the PoS associated with lower bound, base case, and upper bound scenarios by R&D phase, from preclinical through phase II.

The figures for preclinical phase demonstrate that PoS:

- Has in the *lower bound* scenario a modal value of 40%, and it ranges from 40% to 60%, with over two-thirds of the PoS % value falling between 40% and 45%
- Has in the *base case* scenario the same modal value, ranges and frequency distribution with the lower bound scenario
- Has in the *upper bound* scenario a modal value of 60%, and it ranges from 40% to 60%, with half of the PoS % value falling between 40% and 50%

**Figures 4.7 to 4.8: Frequency distributions of PoS (%), preclinical phase**

Lower bound

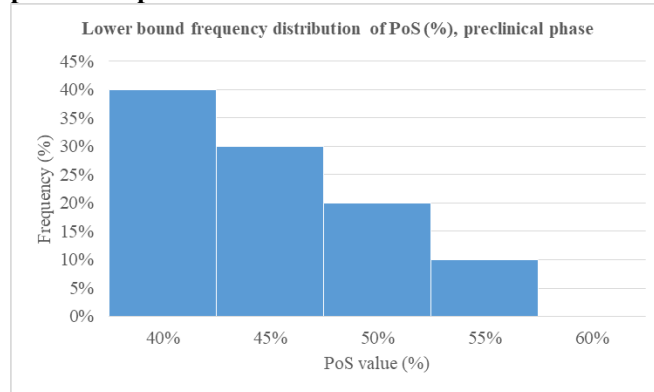

Upper bound

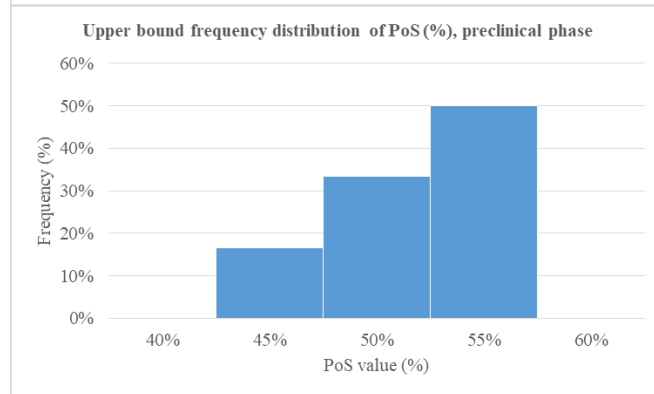

**Figures 4.9 to 4.10: Cumulative distributions of PoS (%), preclinical phase**

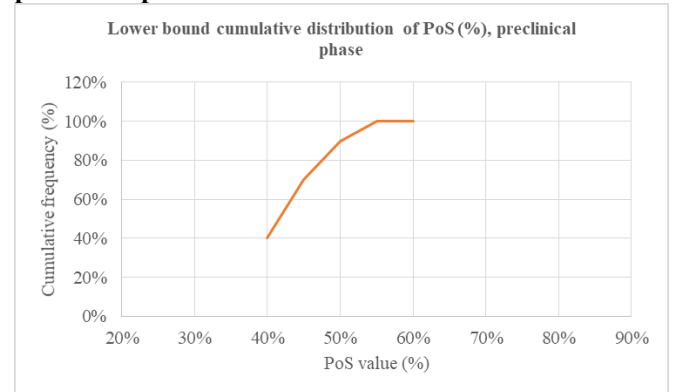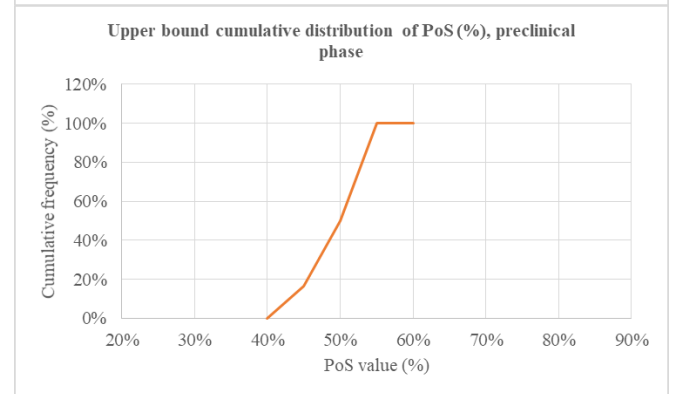

The figures for phase I demonstrate that PoS:

- Has in the *lower bound* scenario a modal value of 50%, and it ranges from 50% to 90%, with half of the PoS % value falling between 50% and 60%
- Has in the *base case* scenario a modal value of 80%, and it ranges from 50% to 90%, with over half of the PoS % value falling between 50% and 75%
- Has in the *upper bound* scenario a modal value of 90%, and it ranges from 50% to 90%, with half of the PoS % value falling between 50% and 80%

**Figures 4.11 to 4.12: Frequency distributions of PoS (%), phase I**

Lower bound

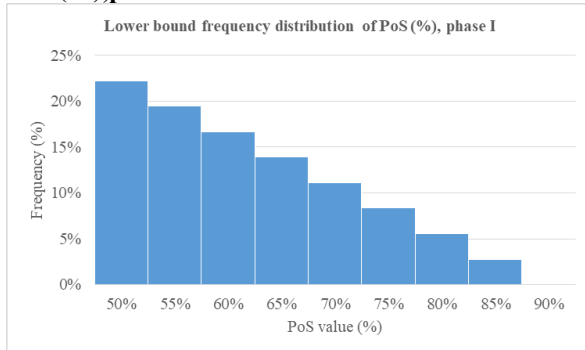

Upper bound

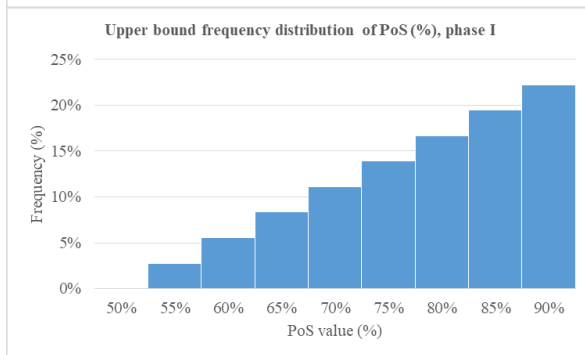

**Figures 4.13 to 4.14: Cumulative distributions of PoS (%), phase I**

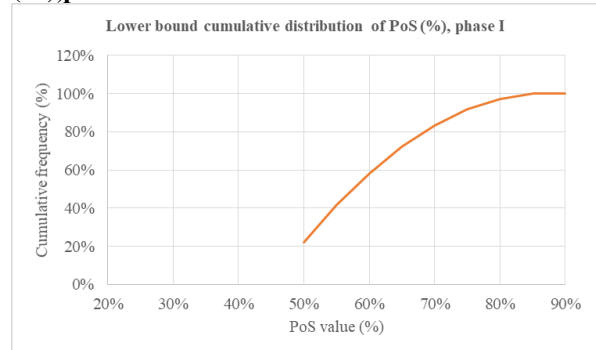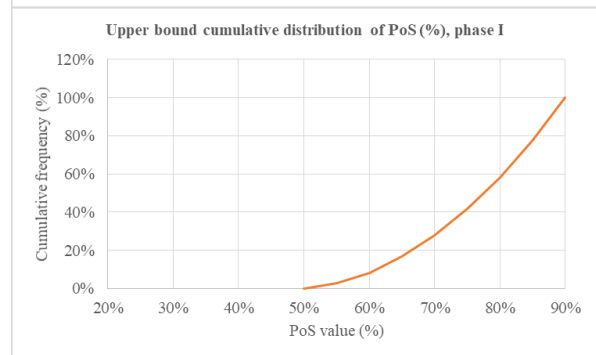

The figures for phase II demonstrate that PoS:

- Has in the *lower bound* scenario a modal value of 20%, and it ranges from 20% to 80%, with half of the PoS % value falling between 20% and 35%
- Has in the *base case* scenario a modal value of 30%, and it ranges from 20% to 80%, with half of the PoS % value falling between 25% and 40%
- Has in the *upper bound* scenario a modal value of 80%, and it ranges from 20% to 80%, with half of the PoS % value falling between 20% and 65%

**Figures 4.15 to 4.16: Frequency distributions of PoS (%), phase II**

Lower bound

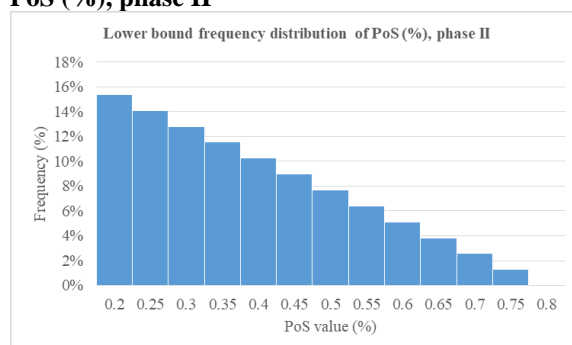

Upper bound

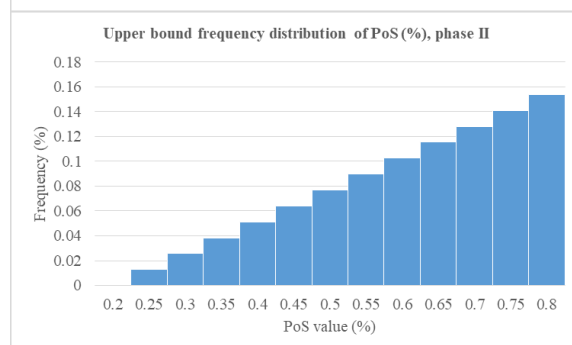

**Figures 4.17 to 4.18: Cumulative distributions of PoS (%), phase II**

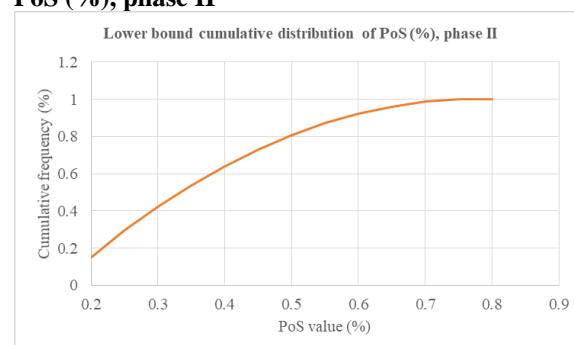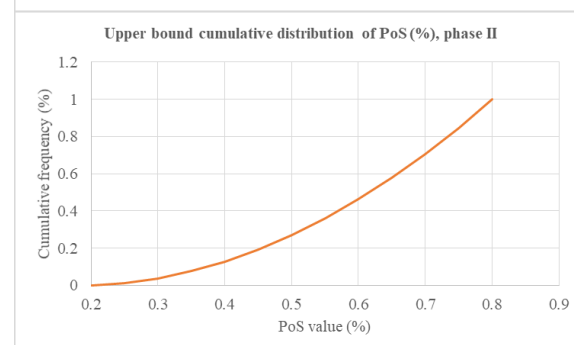

Our final assumption based on which we ran the simulation is that of statistical independence between parameters. The PoS by R&D phase parameters were drawn from different datasets identified in our literature review. Their independence from cost parameters is therefore likely. We assumed no further correlation between PoS by R&D phase and other possibly significant variables to which PoS may relate, namely: targeted disease; and type of technology used. Given no prophylactic vaccine and no standardized regulatory pathway exists for any of the 11 EIDs, disease-specific failure risks are assumed to be the same across all diseases. Moreover, R&D failures due to platform technology issues between preclinical and phase II are assumed not to spill over to other vaccine candidates even when these are being developed by the same organization. However, if phase III and licensure were to be included in the analysis, this assumption would no longer hold, and PoS correlation coefficients between vaccine candidates making use of the same platform technology would have to be calculated and integrated explicitly in the simulation analysis.

## Simulating total vaccine R&D project costs given EID vaccine R&D pipelines are known

Our methodology for calculating total vaccine R&D costs is based on the combination of EID vaccine R&D pipeline data and our simulation parameters in a step-wise manner:

- Step 1: Specify values for the number of vaccine candidates by R&D phase (preclinical, phase I, phase II) available
- Step 2: Specify distributions for cost and PoS by R&D phase to define simulation scenarios. As per our clarifications on distributions in the previous section, we have six different simulation scenarios:
  - o Scenario 1: Simulation with random sampling from base case PoS and lower bound cost distributions
  - o Scenario 2: Simulation with random sampling from base case PoS and higher bound cost distributions
  - o Scenario 3: Simulation with random sampling from lower bound PoS and lower bound cost distributions
  - o Scenario 4: Simulation with random sampling from lower bound PoS and higher bound cost distributions
  - o Scenario 5: Simulation with random sampling from higher bound PoS and lower bound cost distributions
  - o Scenario 6: Simulation with random sampling from higher bound PoS and higher bound cost distributions
- Step 3: For each scenario, draw randomly (10,000 iterations) from a range of cost US\$ values for which the distribution function is known, to determine the base cost associated with bringing the current number of EID vaccine candidates through the next phase of development (call it Stage Gate 1) – i.e. phase I for vaccine candidates currently at preclinical phase of development; phase II for vaccine candidates currently at phase I; and phase III for vaccine candidates currently at phase II.
- Step 4: For each scenario, draw randomly (10,000 iterations) from a range of PoS % values for which the triangular cumulative distribution function is known, to determine the probability of successful advancement of the current number of EID vaccine candidates through the next phase of development (Stage Gate 1).
- Step 5: For each scenario, estimate the integer value of the number of EID vaccine candidates advancing through the next phase of development (Stage Gate 1) by adjusting the values in step 1 according to the PoS % values in step 4.
- Step 6: For each scenario, repeat step 3 above using the cost US\$ value distributions associated with bringing the number of Stage Gate 1 EID vaccine candidates through the next phase of development (Stage Gate 2) - i.e. phase II for vaccine candidates at phase I of development under Stage Gate 1; phase III for vaccine candidates at phase II under Stage Gate 2.
- Step 7: For each scenario, repeat step 4 above using the PoS % value distributions associated with bringing the number of Stage Gate 1 EID vaccine candidates through Stage Gate 2; then repeat steps 5 and 6 to calculate integer values and associated costs of the number of EID vaccine candidates advancing through Stage Gate 3 – i.e. phase III for vaccine candidates that were at phase II in Stage Gate 2.

The above steps, and the data and assumptions supporting the simulation parameters that we described above, allow us to estimate through this simulation model the number of successful phase II outcomes expected from investing in the current vaccine R&D pipelines by EID; and the associated total portfolio costs for achieving those phase II outcomes, given current EID vaccine R&D pipelines are known.

## Appendix 4 references

1. Pronker ES, Weenen TC, Commandeur H, Claassen EH, Osterhaus AD. Risk in vaccine research and development quantified. *PLoS One* 2013; 8(3):e57755

## Appendix 5: Stochastic optimization of EID vaccine R&D portfolios and associated costs

In this appendix we present a more detailed overview of the rationale and design of our stochastic optimization methodology. We begin with a descriptive formulation of the model and then turn to a discussion of solution methods. We conclude with a presentation of our probabilistic sensitivity analysis findings associated with the different stages of the model.

### Section 5.1. Model formulation

#### Rationale

Whereas simulation-based scenario analyses can provide analytical depth to highlighted scenarios, they have limited capacity to demonstrate optimal solutions on their own, such as how to minimize or optimize objectives in EID vaccine R&D. Optimization techniques can provide insights on how to prioritize R&D investments through the minimization or maximization of objective functions subject to analytical constraints that cannot be exceeded.<sup>1</sup> Moreover, the simultaneous consideration of multiple candidate projects is a key aspect in managing a new product development pipeline.<sup>2</sup>

In pharmaceutical R&D management, several stochastic modelling approaches have been proposed to address a variety of problems. A multistage simulation-optimization model identified the optimal number of projects required to deliver pharmaceutical R&D outputs that maximize economic value.<sup>3</sup> Discrete-event simulation was combined with mixed integer linear programming for the optimal structuring of, and ordering of activities within pharmaceutical R&D portfolios.<sup>4</sup> Mixed integer linear programming using simulation and real options valuation was employed to determine the optimal size and structuring of pharmaceutical R&D portfolios.<sup>5</sup> Discrete-event simulation was combined with genetic algorithm based optimization procedures for the optimal selection and ordering of pharmaceutical R&D projects to maximize economic value and to minimize the probability of economic losses.<sup>6</sup> In other approaches discrete-event simulation was combined with efficient frontier analysis to identify optimal pharmaceutical R&D portfolios at different levels of risk and budget constraints.<sup>7,8</sup> Simulation-optimization techniques have been proposed that incorporate mixed integer linear programming for the optimal scheduling and allocation of resources for pharmaceutical R&D pipelines.<sup>9</sup> Other related approaches were proposed for clinical trial scheduling and value maximization in pharmaceuticals.<sup>10-12</sup> An event stochastic simulation model used multi-objective genetic algorithms for the optimal structuring and sequencing of pharmaceutical R&D portfolios to minimize time, minimize risk and maximize economic value of R&D.<sup>2</sup> Others used multistage stochastic programming with knapsack decomposition algorithms for the optimal structuring of pharmaceutical R&D pipelines,<sup>13</sup> and multi-range robust optimization techniques for pharmaceutical R&D project selection.<sup>14</sup>

A number of simulation-optimization techniques for simultaneous portfolio management and manufacturing capacity planning are summarized in the literature.<sup>15</sup> So are several other simulation-optimization techniques for time dependent optimization of new product development pipeline schedules.<sup>2</sup> And programming techniques have recently been reviewed using chance constrained optimization for the optimization of pharmaceutical development processes under uncertainty.<sup>16</sup>

This literature demonstrates that stochastic optimization can provide meaningful prioritization insights for new product development in the presence of uncertainty. Given the inherently risky nature of vaccine R&D, stochastic modelling approaches are likely to represent realistic reflections of the uncertain expectations from the pharmaceutical R&D process. However, this evidence predominantly provides theoretical approaches to hypothetical, yet challenging and sophisticated problems may relate to, but do not directly address real-life situations. This is a common limitation of this literature that our study attempts to overcome.

#### Problem description

Our optimization model can be described as a stochastic non-smooth mixed integer programming (SNP/MIP) problem. The key parameters of the model are provided in the main part of the study, table 2. Here, we provide some definitions and elaborate on several assumptions we have undertaken.

Mixed integer problems concern optimization problems where at least some of these variables are restricted to be integers, introducing discontinuities in the objective function and in the search space of feasible solutions. Non-smooth optimization means optimization of a problem where derivative information on the objective and variables cannot be used to determine the direction in which the objective function is increasing or decreasing, creating a non-convex space of many potentially feasible solutions.

Given the nature of SNP/MIP problems it is unlikely that all possible solutions can be calculated or a globally optimal solution found. In SNP/MIP problems, traditional optimization techniques – such as linear or non-linear convex programming – break down, either due to the irregular structure of the search space or because the search becomes computationally intractable.<sup>17</sup> In such cases, evolutionary computation approaches can offer robust and flexible alternatives to optimization problem solving,<sup>17</sup> where solutions are no longer deterministic (i.e. single point estimates representing global optimum solutions without uncertainty) but probabilistic (i.e. range estimates representing multiple likely optimal solutions with uncertainty).

A general introduction to evolutionary algorithms and an overview of genetic algorithms for modelling and optimization can be found elsewhere in the literature.<sup>17, 18</sup> Although genetic and evolutionary algorithms developed independently since the 1960s,<sup>19, 20</sup> they share the same overall approach to generating candidate solutions to some problem via random selection and evolution of solutions to near-optimal solutions through a series of fitness-based evolutionary steps (see figure 5.1 for an illustration). Despite

small differences in technical details<sup>2</sup>, genetic and evolutionary algorithms are generally treated as part of the same family of evolutionary computation methods.

As figure 5.1 illustrates, an evolutionary algorithm starts by randomly drawing from a population of candidate solutions. The algorithm learns and adapts its search for even better optima in relation to a current solution, as the composition of the population of candidate solutions changes. This adaptation is supported by random changes (mutations) to the original (the parent) population of candidate solutions, yielding new candidate solutions (the children) – which may or may not be an improvement to previous solutions. Throughout this process, an evolutionary algorithm selects the ‘fittest’ and eliminates the ‘least fit’ members of the population of candidate solutions.

**Figure 5.1: The general scheme of an evolutionary algorithm as a flow-chart<sup>18</sup>**

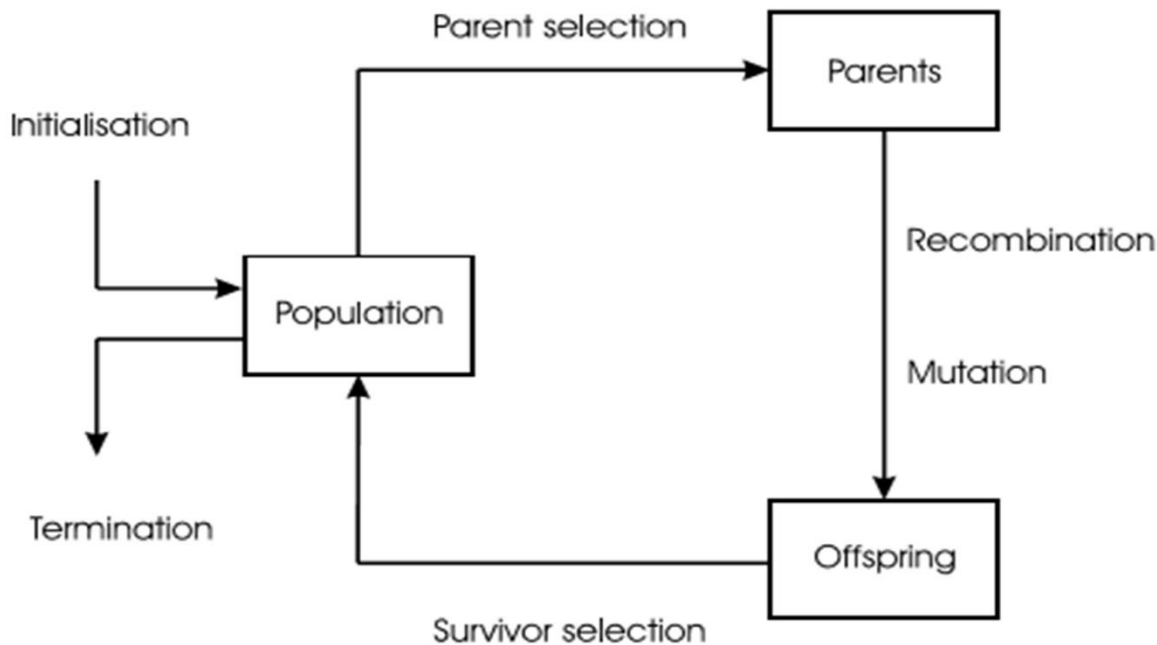

An evolutionary algorithm will continue to drive towards ever-better, or at least ever-new, solutions in comparison to previously generated solutions, only to be constrained by rules designed to serve as stopping conditions in the computation process. These include: (1) the maximum computation time allowed; (2) the number of ‘fitness’ iterations allowed; (3) the maximum time allowed for fitness iterations to take place without improving on the current solutions; (4) and the minimization of differences between new *versus* previous sets of solutions.<sup>18</sup> The latter condition, also known as convergence, is a critical indication of whether optimal or near-optimal solutions have been met. However, premature convergence – the loss of diversity between sets of solutions too quickly in the search process – can lead to solutions that are not near-optimal. To avoid this, the number of optimization runs permitted in any given optimization problem making use of evolutionary algorithms needs to be substantial. Although a good practice, there is no agreement on the minimum threshold for the number of optimization runs required for evolutionary algorithms to reach convergent, or near optimal solutions.<sup>18</sup> In our study, we ran between 10 and 100 optimizations on the same problem, for each stage of the model. We assumed that a minimum of 10 optimizations would be sufficient to minimize the risk of early convergence on the problem for each stage of the model. If differences between model parameters were consistently zero or close to zero on their 5<sup>th</sup> and 95<sup>th</sup> percentile values after 5 consecutive optimizations, beyond and above the 10 minimum runs, we then assumed that a convergent solution had been found.

Evolutionary programming is increasingly being employed to solve stochastic optimization problems through simulation-optimization techniques in pharmaceutical R&D management problems, as demonstrated by evidence also referenced earlier in this appendix.<sup>2,6,12,13,15,21–23</sup> The basic idea behind simulation optimization is that for each set of values for the decision variables considered by the model, we perform one simulation of 10,000 iterations for the constraints and objective that depend on uncertainty. The model uses these measures to decide what set of values it should try next for the decision variables – and the process is repeated with a new simulation conducted at each step of the optimization. The overall benefit of simulation-optimization is the treatment of optimization outcomes as probabilistic outcomes accounting for uncertainty. A significant limitation associated with such techniques is the number of computational steps required to derive solutions, which can grow exponentially with the number of variables and constraints included in the optimization problem. For instance, the cumulative computational time for solutions across all stages of our model was over 20 hours in total.

<sup>2</sup> E.g. an evolutionary algorithm may make a sequence of mutations of an original solution, whereas a genetic algorithm may make a recombination of two original solutions to generate new solutions. Both mutation and recombination operators are stochastic and are applied so as to randomly draw from populations of multiple original solutions.



Although the theory behind evolutionary computation is limited in scope and applicability to special cases,<sup>17</sup> the literature on pharmaceutical R&D management problems demonstrates that evolutionary algorithms provide acceptable means of coping with large and discontinuous search spaces (such as non-smooth mixed integer problems) and robust ways of dealing with problems where there is significant uncertainty associated with key parameters of the problems (such as PoS in pharmaceutical R&D optimization problems).

## Section 5.2. Probabilistic sensitivity analysis

Here we assess the robustness of our results, by analysing the expected outcome probabilities associated with the lowest and highest PoS/Cost scenarios and by examining the degree of correlation between the variance in outcomes and the uncertain parameters of the model. To do this we are employing a probabilistic sensitivity analysis approach, inherent in Monte Carlo simulations<sup>24</sup> and simulation-optimization methods,<sup>25</sup> whereby probability distributions are defined for the uncertain parameters of the model: cost and PoS by R&D phase. By simulating the consequences of random drawings from these distributions, we are able to determine the likelihood that different outcomes will occur and to identify the most significant sources of variation in our model's outcomes.

In stage 1, we asked how many vaccine candidates would ideally need to enter into preclinical, or phase I, or phase II, to achieve at least one phase IIa outcome by EID. The probabilities associated with the occurrence of at least one phase IIa outcome due to vaccine candidates entering different phases of the R&D pipeline by disease are presented in table 5.1 for the low PoS/ low cost scenario and in table 5.2 for the high PoS/ high cost scenario, respectively. Here we find that the probability of zero phase IIa outcomes remains consistently below 5% across scenarios. For each EID, the probability of one vaccine progressing through end of phase IIa is higher than the respective probability of two or more phase IIa outcomes in the low PoS/Cost scenario (see table 5.1). In the high PoS/Cost scenario two phase IIa outcomes per EID are more likely for all EIDs, except for RVF (see table 5.2).

**Table 5.1: Probabilistic Sensitivity Analysis under low PoS/ low cost scenario, stage 1 of stochastic optimization model**

|                           | <b>0 phase IIb/III ready candidates</b> | <b>1 phase IIb/III ready candidate</b> | <b>2 phase IIb/III ready candidates</b> | <b>3 phase IIb/III ready candidates</b> | <b>4 phase IIb/III ready candidates</b> | <b>5 phase IIb/III ready candidates</b> |
|---------------------------|-----------------------------------------|----------------------------------------|-----------------------------------------|-----------------------------------------|-----------------------------------------|-----------------------------------------|
| RVF                       | 4%                                      | 52%                                    | 32%                                     | 11%                                     | 1%                                      | 0%                                      |
| Chikungunya               | 0%                                      | 50%                                    | 34%                                     | 14%                                     | 2%                                      | 0%                                      |
| CCHF                      | 5%                                      | 49%                                    | 32%                                     | 11%                                     | 3%                                      | 0%                                      |
| Marburg                   | 5%                                      | 49%                                    | 32%                                     | 11%                                     | 3%                                      | 0%                                      |
| MERS                      | 4%                                      | 49%                                    | 32%                                     | 12%                                     | 3%                                      | 0%                                      |
| SARS                      | 4%                                      | 48%                                    | 31%                                     | 13%                                     | 3%                                      | 1%                                      |
| SFTS                      | 4%                                      | 47%                                    | 32%                                     | 13%                                     | 3%                                      | 1%                                      |
| Lassa                     | 4%                                      | 47%                                    | 32%                                     | 13%                                     | 4%                                      | 0%                                      |
| Nipah                     | 4%                                      | 47%                                    | 32%                                     | 13%                                     | 4%                                      | 0%                                      |
| Zika                      | 0%                                      | 46%                                    | 34%                                     | 16%                                     | 4%                                      | 0%                                      |
| Starting from phase II    | 0%                                      | 56%                                    | 33%                                     | 11%                                     | 0%                                      | 0%                                      |
| Starting from preclinical | 1%                                      | 37%                                    | 34%                                     | 19%                                     | 7%                                      | 2%                                      |
| Starting from phase I     | 0%                                      | 36%                                    | 35%                                     | 20%                                     | 7%                                      | 2%                                      |

**Table 5.2: Probabilistic Sensitivity Analysis under high PoS/ high cost scenario, stage 1 of stochastic optimization model**

|                           | <b>0 phase IIb/III ready candidates</b> | <b>1 phase IIb/III ready candidate</b> | <b>2 phase IIb/III ready candidates</b> | <b>3 phase IIb/III ready candidates</b> | <b>4 phase IIb/III ready candidates</b> |
|---------------------------|-----------------------------------------|----------------------------------------|-----------------------------------------|-----------------------------------------|-----------------------------------------|
| Chikungunya               | 1%                                      | 30%                                    | 55%                                     | 14%                                     | 0%                                      |
| Zika                      | 2%                                      | 37%                                    | 51%                                     | 10%                                     | 0%                                      |
| RVF                       | 5%                                      | 55%                                    | 40%                                     | 0%                                      | 0%                                      |
| MERS                      | 4%                                      | 43%                                    | 46%                                     | 7%                                      | 0%                                      |
| Marburg                   | 4%                                      | 38%                                    | 46%                                     | 12%                                     | 0%                                      |
| CCHF                      | 4%                                      | 37%                                    | 45%                                     | 14%                                     | 0%                                      |
| SARS                      | 3%                                      | 37%                                    | 45%                                     | 15%                                     | 0%                                      |
| Lassa                     | 3%                                      | 37%                                    | 45%                                     | 15%                                     | 0%                                      |
| SFTS                      | 4%                                      | 36%                                    | 45%                                     | 15%                                     | 0%                                      |
| Nipah                     | 4%                                      | 36%                                    | 45%                                     | 15%                                     | 0%                                      |
| Starting from phase II    | 1%                                      | 24%                                    | 59%                                     | 16%                                     | 0%                                      |
| Starting from phase I     | 0%                                      | 17%                                    | 43%                                     | 37%                                     | 3%                                      |
| Starting from preclinical | 1%                                      | 19%                                    | 44%                                     | 32%                                     | 4%                                      |

In stage 2, we asked how much investment would be needed to progress at least one vaccine through end of phase IIa by EID, given current and new preclinical vaccine candidates are made available. As table 5.3 demonstrates, the probabilities associated with at least one phase IIa outcome per EID at a total cost of less than US\$ 4 billion or more than US\$ 7 billion are less than 2% across scenarios. The most likely cost range for achieving the minimum phase IIa targets for all 10 EIDs is US\$5 – 6 billion, followed by the US\$4 – 5 billion range and the US\$6 – 7 billion range, respectively.

**Table 5.3: Probabilistic Sensitivity Analysis across PoS/cost scenarios, stage 2 of stochastic optimization model**

| Scenario      | <\$1bn | \$1–2bn | \$2–3bn | \$3–4bn | \$4–5bn | \$5–6bn | \$6–7bn | \$7–8bn | \$8–9bn | \$9–10bn | >\$10bn |
|---------------|--------|---------|---------|---------|---------|---------|---------|---------|---------|----------|---------|
| Low PoS/cost  | 2%     | 28%     | 33%     | 22%     | 10%     | 4%      | 0.5%    | 0.5%    | 0%      | 0%       | 0%      |
| High PoS/cost | 4%     | 18%     | 19%     | 26%     | 14%     | 9%      | 4%      | 3%      | 2%      | 1%       | 0%      |

Finally, as table 5.4 demonstrates, the variance in expected phase IIa outcomes is strongly correlated with the variance in PoS by R&D phase, and in particular with PoS in phase II. The variance in associated portfolio costs is positively correlated with both costs and PoS by R&D phase. However, the variance in expected costs is most sensitive to preclinical and phase II costs, followed by PoS by R&D phase.

**Table 5.4: Correlations between variance in stochastic optimization outcomes and uncertain parameters in the model**

|                 | Cost |      | Phase IIa outcomes |      |
|-----------------|------|------|--------------------|------|
|                 | Low  | High | Low                | High |
| Preclinical \$  | 72%  | 82%  | N/A                | N/A  |
| Phase I \$      | 40%  | 32%  | N/A                | N/A  |
| Phase II \$     | 53%  | 46%  | N/A                | N/A  |
| Preclinical PoS | 10%  | 6%   | 21%                | 20%  |
| Phase I PoS     | 11%  | 4%   | 32%                | 36%  |
| Phase II PoS    | N/A  | N/A  | 86%                | 82%  |

This sensitivity analysis demonstrates that whereas zero phase II outcomes are unlikely, expected phase II outcomes above and beyond one phase IIb/III ready candidate are dependent on the PoS. Moreover, whereas the likelihood of portfolio costs below US\$ 1 billion or above US\$8 billion to achieve minimum preparedness R&D targets for the EIDs of interest is close to zero, the likely cost below or above this range will depend on the relationship of the PoS by R&D phase and the cost associated with experience and indirect costs of the vaccine developers. For instance, in a scenario where low costs were associated with high PoS distributions the same numbers of vaccine candidates would need to be funded as per the high PoS/high Cost scenario, but the overall portfolio cost would drop to US\$ 1.6 billion (US\$715 million – 2.9 billion range); whereas in a scenario where high costs were associated with low PoS distributions, the same numbers of vaccine candidates would need to be funded as per the low PoS/low Cost scenario, however the portfolio cost would increase to US\$ 6.8 billion (US\$1.5 – 15.1 billion range).

**Table 5.5: Minimum R&D portfolios and costs for progressing at least one vaccine candidate through end of phase IIa, per EID, under extreme scenarios**

| Pathogen          | #preclinical candidates (High PoS/ Low Cost to Low PoS/ High Cost scenario) |                         | #phase I candidates (High PoS/ Low Cost to Low PoS/ High Cost scenario) | #phase II candidates (High PoS/ Low Cost to Low PoS/ High Cost scenario) | Expected US\$ cost, preclinical through phase IIa (95% CI) |                                           | Expected number of phase IIb/III ready vaccine candidates (95% CI) |                             |
|-------------------|-----------------------------------------------------------------------------|-------------------------|-------------------------------------------------------------------------|--------------------------------------------------------------------------|------------------------------------------------------------|-------------------------------------------|--------------------------------------------------------------------|-----------------------------|
|                   | # currently available candidates                                            | # new candidates needed | # currently available candidates                                        | # currently available candidates                                         | High PoS/ Low Cost scenario                                | Low PoS/ High Cost scenario               | High PoS/ Low Cost scenario                                        | Low PoS/ High Cost scenario |
| Chikungunya       | 0 to 3                                                                      | -                       | 2 to 5                                                                  | 2                                                                        | \$64 m<br>(\$21–131 m)                                     | \$314 m<br>(\$99–684 m)                   | 1 (1 to 3)                                                         | 1 (1 to 2)                  |
| Zika              | -                                                                           | -                       | 4 to 8                                                                  | 1                                                                        | \$88 m<br>(\$31–177 m)                                     | \$271 m<br>(\$75–662 m)                   | 1 (1 to 3)                                                         | 1 (1 to 3)                  |
| Rift Valley Fever | 5 to 13                                                                     | -                       | -                                                                       | 2                                                                        | \$103 m<br>(\$46–185 m)                                    | \$562 m<br>(\$122 m–1.3 bn)               | 1 (1 to 3)                                                         | 1 (1 to 2)                  |
| MERS              | 3 to 12                                                                     | -                       | 4                                                                       | -                                                                        | \$114 m<br>(\$50–208 m)                                    | \$592 m<br>(\$135 m–1.3 bn)               | 1 (1 to 3)                                                         | 1 (1 to 3)                  |
| Marburg           | 7 to 16                                                                     | -                       | 2                                                                       | -                                                                        | \$150 m<br>(\$66–274 m)                                    | \$693 m<br>(\$144 m–1.6 bn)               | 1 (1 to 3)                                                         | 1 (1 to 3)                  |
| Lassa             | 11 to 21                                                                    | -                       | -                                                                       | -                                                                        | \$185 m<br>(\$80–341 m)                                    | \$835 m<br>(\$157 m–1.9 bn)               | 1 (1 to 3)                                                         | 1 (1 to 3)                  |
| CCHF              | 6                                                                           | 3 to 12                 | 1                                                                       | -                                                                        | \$168 m<br>(\$74–309 m)                                    | \$744 m<br>(\$147 m–1.7 bn)               | 1 (1 to 3)                                                         | 1 (1 to 3)                  |
| Nipah             | 11 to 13                                                                    | 0 to 8                  | -                                                                       | -                                                                        | \$185 m<br>(\$80–341 m)                                    | \$835 m<br>(\$157 m–1.9 bn)               | 1 (1 to 3)                                                         | 1 (1 to 3)                  |
| SARS              | 6                                                                           | 5 to 15                 | -                                                                       | -                                                                        | \$185 m<br>(\$80–341 m)                                    | \$835 m<br>(\$157 m–1.9 bn)               | 1 (1 to 3)                                                         | 1 (1 to 3)                  |
| SFTS              | 1                                                                           | 10 to 20                | -                                                                       | -                                                                        | \$185 m<br>(\$80–341 m)                                    | \$835 m<br>(\$157 m–1.9 bn)               | 1 (1 to 3)                                                         | 1 (1 to 3)                  |
| <b>Total</b>      | <b>50 to 91</b>                                                             | <b>18 to 55</b>         | <b>13 to 20</b>                                                         | <b>5</b>                                                                 | <b>\$1.6 bn</b><br><b>(\$0.7–2.9 bn)</b>                   | <b>\$6.8 bn</b><br><b>(\$1.5–15.1 bn)</b> | <b>10 (10 to 30)</b>                                               | <b>10 (10 to 29)</b>        |

### Section 5.3. Quantifying uncertainty in analytical measurements

As explained in appendix 4, statistical independence has been assumed between cost and PoS distributions by R&D phase. Moreover, it is assumed that self-reported cost estimates are statistically independent from numbers of vaccine candidates identified in the R&D pipeline. As per section 5.2, the variance in portfolio costs associated with phase IIa outcomes is positively correlated with cost and PoS distributions by R&D phase. Given that this variance is likely to be amplified from the variance observed in the reported cost and pipeline data, we quantified the uncertainty associated with the simulation-optimization analysis to determine to what extent the variation in the observed data was amplified in the analytical process. We did this by:

- Estimating the variance of the product of the following two variables: (1) number of vaccine candidates per R&D phase; (2) self-reported cost estimates per R&D phase, using the following formula:

$$Var(XY) = E(X^2)E(Y^2) - [E(X)]^2[E(Y)]^2$$

Where

$X$  = number of candidates in the pipeline considered

$Y$  = self-reported cost estimates

- Comparing the standard deviation of the above with the standard deviation associated with the PoS-adjusted cost estimates in the simulation-optimization.

As per table 3 in the main article, the standard deviation of the cost of a single vaccine candidate advancing through end of phase IIa in the simulation model assuming 100% PoS is lower than the standard deviation observed in the self-reported cost data. The standard deviation of the cost of one vaccine candidate successfully advancing through end of phase IIa in the simulation-optimization deviates increasingly from the standard deviation observed in the self-reported data as the number of vaccine candidates considered start from earlier phases of development and PoS distributions by R&D phase are taken into account (for comparison of standard deviations see Appendix table 5.6 below). In line with the sensitivity analysis above, this suggests that the amplification of uncertainty in the measurement of EID vaccine R&D costs is solely based on the objective function of the simulation-optimization model (minimum 1 phase IIa outcome) and the impact of PoS distributions by R&D phase on the numbers of vaccine candidates required per R&D phase to achieve this objective. There are no other sources of uncertainty amplification in the analysis in relation to the variation observed in the self-reported cost data.

**Table 5.6: Comparison of standard deviations of cost estimates between simulation-optimization and self-reported data**

|                                             | Simulation assuming 100% PoS vs self-reported data |            |            |            | Simulation-optimization of PoS-adjusted cost vs self-reported data |                       |                           |
|---------------------------------------------|----------------------------------------------------|------------|------------|------------|--------------------------------------------------------------------|-----------------------|---------------------------|
|                                             | Preclinical                                        | Phase I    | Phase II   | Total      | Starting from phase 2                                              | Starting from phase 1 | Starting from preclinical |
| <b>High Cost/<br/>High PoS<br/>scenario</b> |                                                    |            |            |            |                                                                    |                       |                           |
| SD self-reported                            | 28,345,786                                         | 15,265,428 | 26,226,347 | 67,747,184 | 92,045,406                                                         | 76,707,607            | 260,839,556               |
| SD simulation-optimization                  | 27,914,228                                         | 15,032,372 | 25,826,057 | 40,849,928 | 103,304,711                                                        | 142,019,505           | 332,532,567               |
| <b>Low Cost/<br/>Low PoS<br/>scenario</b>   |                                                    |            |            |            |                                                                    |                       |                           |
| SD self-reported                            | 5,925,791                                          | 5,722,608  | 10,508,552 | 18,975,332 | 55,916,750                                                         | 52,726,261            | 120,381,555               |
| SD simulation-optimization                  | 5,895,823                                          | 5,694,263  | 10,458,030 | 13,377,017 | 52,306,472                                                         | 86,375,514            | 150,096,592               |

## Appendix 5 referencnes

1. Phillips LD, Bana e Costa CA. Transparent prioritisation, budgeting and resource allocation with multi-criteria decision analysis and decision conferencing. *Annals of Operations Research*. 2007; 154: 51–68
2. Perez-Escobedo JL, Azzaro-Pantel C, Pibouleau L. Multiobjective strategies for New Product Development in the pharmaceutical industry. *Computers and Chemical Engineering* 2012; 37: 278– 296
3. Ding M, Eliashberg J. Structuring the new product development pipeline. *Management Science* 2002; 48: 343–363
4. Subramanian D, Pekny J, Reklaitis G, Blau G. Simulation-optimization framework for stochastic optimization of R&D pipeline management. *AIChE Journal* 2003; 49: 96–112
5. Rogers M, Gupta A, Maranas C. Real options based analysis of optimal pharmaceutical research and development portfolios. *Industrial and Engineering Chemistry* 2002; 41: 6607–6620
6. Blau GE, Pekny JF, Varma VA, Bunch, PR. Managing a portfolio of interdependent new product candidates in the pharmaceutical industry. *Journal of Product Innovation Management* 2004; 21: 227–245
7. Rajapakse A, Titchener-Hooker NJ, Farid SS. Modelling of the biopharmaceutical drug development pathway and portfolio management. *Computers and Chemical Engineering* 2005; 29: 1357–1368
8. Rajapakse A, Titchener-Hooker NJ, Farid SS. Integrated approach to improving the value potential of biopharmaceutical R&D portfolios while mitigating risk. *Journal of Chemical Technology and Biotechnology* 2006; 81:1705–171
9. Varma VA, Pekny JF, Blau GE, Reklaitis GV. A framework for addressing stochastic and combinatorial aspects of scheduling and resource allocation in pharmaceutical R&D pipelines. *Computers and Chemical Engineering* 2008; 32: 1000–1015
10. Colvin M, Maravelias CT. A stochastic programming approach for clinical trial planning in new drug development. *Computers and Chemical Engineering* 2008; 32(11): 2626–2642
11. Colvin M, Maravelias C. Scheduling of testing tasks and resource planning in new product development using stochastic programming. *Computers and Chemical Engineering* 2009; 33(5): 964–976
12. Colvin M, Maravelias CT. R&D pipeline management: Task interdependencies and risk management. *European Journal of Operational Research* 2011; 215: 616–628
13. Christian B, Selen C. (2014). Heuristic Solution Approaches to the Pharmaceutical R&D Pipeline Management Problem. *Computers & Chemical Engineering* 2015; 74: 34-47
14. Duzgun R, Thiele A. Robust Optimization with Multiple Ranges: Theory and Application to Pharmaceutical Project Selection. *14th INFORMS Computing Society Conference Richmond, Virginia, January 11-13, 2015*; 103:118. <http://dx.doi.org/10.1287/ics.2015.0008>
15. George ED, Farid SS. Strategic Biopharmaceutical Portfolio Development: An Analysis of Constraint-Induced Implications. *Biotechnology Progress* 2008; 24: 698-713
16. Grossman IE, Apap RM, Calfa BA, Garcia-Herreros P, Zhang Q. Recent advances in mathematical programming techniques for the optimization of process systems under uncertainty. *Computers & Chemical Engineering* 2016; 91: 3-14
17. McCall J. Genetic algorithms for modelling and optimisation. *Journal of Computational and Applied Mathematics* 2005; 184(1): 205-222
18. Eiben AE, Smith JE. What is an Evolutionary Algorithm? In Eiben AE and Smith JE. Introduction to Evolutionary Computing. *Springer* 2003; Chapter 2: 15-35
19. Holland JH. *Adaptation in Natural and Artificial Systems*. The University of Michigan Press. Ann Arbor, Michigan, 1975
20. Fogel LJ, Ownes AJ, Walsh MJ. *Artificial Intelligence through Simulated Evolution*. John Wiley & Sons, New York, 1966
21. Luis Fernando MM, Perez-Escobedo JL, Azzaro-Pantel C, Pibouleau L, Domenech S, Aguilar-Lasserre A. Selecting the best portfolio alternative from a hybrid multiobjective GA-MCDM approach for New Product Development in the pharmaceutical industry. *IEEE Symposium on Computational Intelligence in Multicriteria Decision-Making (MDCM)* 2011. 10.1109/SMDCM.2011.5949271
22. Yu L, Wang S, Wen F, Lai KK. Genetic algorithm-based multi-criteria project portfolio selection. *Annals of Operations Research* 2012; 197(1): 71–86
23. Nie W. *Cost evaluation and portfolio management optimization for biopharmaceutical product development*. Doctoral Thesis at the Advanced Centre for Biochemical Engineering Department of Biochemical Engineering UCL, 2015
24. Doubilet P, Begg CB, Weinstein MC, Braun P, McNeil BJ. Probabilistic sensitivity analysis using Monte Carlo simulation. A practical approach. *Medical Decision Making* 1985; 5(2):157-77
25. Uryasev S. *Probabilistic Constrained Optimization Methodology and Applications*. Springer. 2000
